# Supplementary material for: Preventing childhood obesity, phase II feasibility study focusing on South Asians: BEACHeS
Source: PubMed Central journal article supplement (PMC3987740; doi:10.1136/bmjopen-2013-004579), 2014-04-10
Supplement: bmjopen-2013-004579.draft_revisions.pdf [file bmjopen-2013-004579.draft_revisions.pdf]

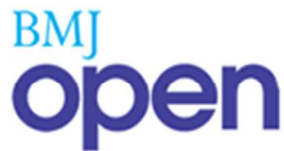

**Preventing childhood obesity, exploratory trial focusing on  
South Asians: BEACHeS**

|                                 |                                                                                                                                                                                                                                                                                                                                                                                                                                                                                                                                                                                                                                                                                                                                                                                                                                                                                                                                                   |
|---------------------------------|---------------------------------------------------------------------------------------------------------------------------------------------------------------------------------------------------------------------------------------------------------------------------------------------------------------------------------------------------------------------------------------------------------------------------------------------------------------------------------------------------------------------------------------------------------------------------------------------------------------------------------------------------------------------------------------------------------------------------------------------------------------------------------------------------------------------------------------------------------------------------------------------------------------------------------------------------|
| Journal:                        | <i>BMJ Open</i>                                                                                                                                                                                                                                                                                                                                                                                                                                                                                                                                                                                                                                                                                                                                                                                                                                                                                                                                   |
| Manuscript ID:                  | bmjopen-2013-004579                                                                                                                                                                                                                                                                                                                                                                                                                                                                                                                                                                                                                                                                                                                                                                                                                                                                                                                               |
| Article Type:                   | Research                                                                                                                                                                                                                                                                                                                                                                                                                                                                                                                                                                                                                                                                                                                                                                                                                                                                                                                                          |
| Date Submitted by the Author:   | 29-Nov-2013                                                                                                                                                                                                                                                                                                                                                                                                                                                                                                                                                                                                                                                                                                                                                                                                                                                                                                                                       |
| Complete List of Authors:       | Adab, Peymane; The University of Birmingham, Public Health, Epidemiology & Biostatistics<br>Pallan, Miranda; University of Birmingham, Public Health, Epidemiology & Biostatistics<br>Cade, Janet; University of Leeds,<br>Ekelund, Ulf; MRC Epidemiology Unit,<br>Barrett, Timothy; Birmingham Childrens Hospital University of Birmingham, Diabetes Unit Institute of Child Health<br>Daley, Amanda; University of Birmingham, Primary Care Clinical Sciences<br>Deeks, Jon; University of Birmingham, Public Health, Epidemiology & Biostatistics<br>Duda, Joan; University of Birmingham, Sport, Exercise & Rehabilitation Sciences<br>Gill, Paramjit; University of Birmingham, Primary Care Clinical Sciences<br>Parry, Jayne; University of Birmingham, Public Health, Epidemiology & Biostatistics<br>Bhopal, Raj; University of Edinburgh<br>Cheng, Kar Keung; The University of Birmingham, Public Health, Epidemiology & Biostatistics |
| <b>Primary Subject Heading</b>: | Public health                                                                                                                                                                                                                                                                                                                                                                                                                                                                                                                                                                                                                                                                                                                                                                                                                                                                                                                                     |
| Secondary Subject Heading:      | Public health                                                                                                                                                                                                                                                                                                                                                                                                                                                                                                                                                                                                                                                                                                                                                                                                                                                                                                                                     |
| Keywords:                       | Obesity, Children, Prevention                                                                                                                                                                                                                                                                                                                                                                                                                                                                                                                                                                                                                                                                                                                                                                                                                                                                                                                     |
|                                 |                                                                                                                                                                                                                                                                                                                                                                                                                                                                                                                                                                                                                                                                                                                                                                                                                                                                                                                                                   |

SCHOLARONE™  
Manuscripts

**Title: Preventing childhood obesity, exploratory trial focusing on South Asians: BEACHeS**

**Authors:** Peymané Adab (MD)<sup>1</sup>, Miranda Pallan (PhD)<sup>1</sup>, Janet Cade (PhD)<sup>2</sup>, Ulf Ekelund (PhD)<sup>3</sup>, Timothy Barrett (PhD)<sup>4</sup>, Amanda Daley (PhD)<sup>1</sup>, Jonathan Deeks (PhD)<sup>1</sup>, Joan Duda (PhD)<sup>5</sup>, Paramjit Gill (DM)<sup>1</sup>, Jayne Parry (MD)<sup>1</sup>, Raj Bhopal (PhD)<sup>6</sup>, KK Cheng (PhD)<sup>1</sup>

**Affiliations:**

<sup>1</sup>School of Health & Population Sciences (Public Health, Epidemiology and Biostatistics and Primary Care Clinical Sciences), University of Birmingham

<sup>2</sup>Nutritional Epidemiology Group, School of Food Science and Nutrition, University of Leeds

<sup>3</sup>MRC Epidemiology Unit, Institute of Metabolic Science, Cambridge & Department of Sport Medicine, Norwegian School of Sport Sciences

<sup>4</sup>School of Clinical and Experimental Medicine, University of Birmingham

<sup>5</sup>Sport & Exercise Sciences, The University of Birmingham

<sup>6</sup>Edinburgh Ethnicity and Health Research Group, Centre for Population Health Sciences, University of Edinburgh

**Address correspondence to:**

Miranda J Pallan, Public Health, Epidemiology and Biostatistics, University of Birmingham, Edgbaston, Birmingham, B15 2TT, UK.

Tel: +441214147990

Fax: +441214147878

E-mail: m.j.pallan@bham.ac.uk

**Key words:** Childhood obesity prevention; exploratory trial; MRC framework for complex interventions

**Word count:**

Abstract: 273

Manuscript: 3366

## Abstract

**Objectives:** To assess feasibility and acceptability of a multifaceted, culturally appropriate intervention for preventing obesity in South Asian children, and to obtain data to inform sample size for a definitive trial.

**Design:** Phase II exploratory trial of a complex intervention.

**Setting:** Eight primary schools in inner city Birmingham, UK, within populations that are predominantly South Asian.

**Participants:** 1090 children aged 6-8 years took part in the intervention. 571 (85.9% from South Asian background) underwent baseline measures. 85.5% (n=488) were followed up 2 years later.

**Interventions:** The one-year intervention consisted of school and family based activities, targeting dietary and physical activity behaviours. The intervention was modified and refined throughout the period of delivery.

**Main outcome measures:** Acceptability and feasibility of the intervention and of measurements required to assess outcomes in a definitive trial. The difference in BMI z-score between arms was used to inform sample size calculations for a definitive trial.

**Results:** Some intervention components (increasing school physical activity opportunities, family cooking skills workshops, signposting of local leisure facilities and attending day event at a football club) were feasible and acceptable. Other components were acceptable, but not feasible. Promoting walking groups was neither acceptable nor feasible. At follow up, children in the intervention compared with the control group were less likely to be obese (OR 0.41; 0.19 to 0.89), and had lower adjusted BMI z-score [-0.15 (-0.27, -0.03)].

**Conclusions:** The exploratory trial informed components for an intervention programme. The favourable direction of outcome for weight status in the intervention group supports the need for a definitive trial. A cluster randomised controlled trial is now underway to assess the clinical and cost-effectiveness of the intervention.

## Article Summary

### *Strengths and limitations of the study*

- We report the findings of an exploratory trial of a childhood obesity prevention intervention that focuses on primary school-aged children from South Asian communities in the UK. Despite their susceptibility to the cardiometabolic consequences of obesity, little obesity prevention research has been undertaken in these communities previously.
- The early phases of the UK Medical Research Framework for complex health interventions has guided the intervention development and evaluation process undertaken in this exploratory trial.
- The feasibility and acceptability of the childhood obesity prevention intervention components was variable and context dependent, however, the exploratory nature of the trial enabled us to modify and refine delivery of the intervention throughout.
- Development and evaluation of the feasibility and acceptability of the intervention was undertaken in materially disadvantaged, predominantly South Asian communities, thus its transferability would be dependent on tailoring to the specific local context.
- The final intervention programme, following modification and refinement in this exploratory trial, is being definitively evaluated in an ongoing cluster-randomised controlled trial.

## Introduction

Childhood obesity is a growing problem worldwide.[1] Apart from psychological and social problems, longitudinal studies show adverse future health consequences in children as young as 7 years old who are obese.[2] In the UK, although childhood overweight prevalence has stabilised, socioeconomic disparities have widened, with increasing trend in more deprived sub-populations.[3] Data from the national childhood surveillance programmes in England show that at school entry (age 4-5 years), 9.5% of children are obese (i.e., above 95<sup>th</sup> percentile for national reference standards), but this prevalence doubles (19.2%) by the end of primary school (age 11).[4] The rate of increase among children from South Asian (SA) ethnic groups, especially girls, is greater than that for the population as a whole (increasing trend of 1.13% and 0.66% per year for Bangladeshi and Pakistani girls respectively, compared with 0.35% yearly increase in White British).[5] Thus the primary school period presents a key phase for prevention, and SA are an important target group.

However, despite numerous systematic reviews,[6,7] reports[8,9] and guidelines,[10] evidence for effective approaches to prevention is limited, particularly among minority ethnic groups. Relevant trials suggest that multifaceted school-based interventions have potential, particularly those that also include a home or community element, but the most effective combination of components is not clear.[7,9] The need for involving stakeholders, such as families, schools and local communities, in the decision making regarding potential intervention strategies has been highlighted.[6] Furthermore, for a complex intervention such as obesity prevention, which has several interconnecting components, a rigorous and iterative phased approach is required to improve study design, execution and applicability of results. The UK Medical Research Council (MRC) proposed a framework for such interventions.[11] Given the growing problem of obesity and lack of clarity on effective approaches to

1  
2  
3 prevention, it would be unwise to embark on another trial without thorough attention to the  
4  
5 early phases described in the MRC framework.  
6

7  
8 The Birmingham healthy Eating and Active lifestyle for CHildren Study (BEACHeS  
9  
10 <http://www.birmingham.ac.uk/research/activity/mds/projects/HaPS/PHEB/WAVES/BEACH>  
11 [eS/index.aspx](http://www.birmingham.ac.uk/research/activity/mds/projects/HaPS/PHEB/WAVES/BEACH)), used the theoretical and modelling phases of the MRC framework to develop  
12  
13 a multifaceted childhood obesity prevention programme, targeting SA children (phase I).[12]  
14  
15 Here we report on the exploratory trial (phase II). The aim was to assess feasibility and  
16  
17 acceptability of the intervention. In addition we wanted to obtain data to inform a definitive  
18  
19 (phase III) cluster-randomised controlled trial (RCT).  
20  
21  
22  
23  
24  
25  
26  
27  
28  
29  
30  
31  
32  
33  
34  
35  
36  
37  
38  
39  
40  
41  
42  
43  
44  
45  
46  
47  
48  
49  
50  
51  
52  
53  
54  
55  
56  
57  
58  
59  
60

## Materials and Methods

The exploratory trial was conducted in eight Birmingham primary schools from 2006 to 2009. Children underwent baseline measures between December 2006 and June 2007. Four schools were selected to receive the intervention (2007/8 academic year), and the remainder had no active intervention. Follow up data were collected two years after baseline.

### *Setting*

Birmingham is UK's second city with a high minority ethnic population (34%), one fifth being from the three main SA communities (Pakistani, Bangladeshi and Indian). We obtained a list of all Local Authority-maintained primary schools in Birmingham. Of 304 schools, 52 had  $\geq 50\%$  of pupils from SA background (mean 75%). These, compared with the remainder, had a higher proportion of children eligible for free school meals (FSM), indicating higher deprivation. Schools were ranked in order of FSM eligibility, and those from either extreme were successively invited until 8 agreed to take part.

### *Participants*

Pupils from years 1 and 2 (aged 5-7 years) were invited to participate. Parents of the children were approached by letter distributed through the schools, and active consent was sought for their child to participate in measurements.

### *Baseline and follow up measures*

Age, sex and ethnicity data (from parent report at school entry) were obtained from school records on all eligible children in participating schools. Children with consent also underwent a range of anthropometric measurements, including standing height (measured to nearest 0.1cm with a Leicester Height Measure), weight (measured to nearest 0.1 kg with aTanita bioimpedance monitor), two measures of waist circumference (measured to nearest 0.5cm),

1  
2  
3 and skinfold thickness at five sites (biceps, triceps, subscapular, suprailiac and thigh;  
4  
5 measured using a Holtain calliper). Children also completed interviewer administered  
6  
7 questionnaires (not discussed in this paper, but including: quality of life (PedsQL),[13] self  
8  
9 concept (Marsh self-description questionnaire),[14] perceived physical competence (Harter  
10  
11 Pictorial Scale for Young Children),[15] and body image perception (adapted Collin's  
12  
13 Pictorial Image Scale)[16]). All measures were undertaken by trained researchers using  
14  
15 standard protocols.

16  
17  
18 Dietary intake was assessed using the Child And Dietary Evaluation Tool (CADET)[17]; a  
19  
20 24-hour food tick list that has been validated against a semi-weighed diary in children aged 3-  
21  
22 7 years. A researcher completed the CADET for children during school hours, and parents  
23  
24 were given instructions for completing it for the remainder of the 24 hour period. Physical  
25  
26 activity levels were assessed using the Actiheart monitor (CamnTech, Papworth UK) worn  
27  
28 for five consecutive days, including a weekend. This is validated for use in children<sup>18</sup> and  
29  
30 was set up to measure acceleration and heart rate at 30 second epochs. In addition, parents  
31  
32 were asked to complete questionnaires which included questions on family composition, and  
33  
34 family dietary and physical activity habits.

### 35 36 37 38 39 ***Intervention***

40  
41  
42 The process for intervention development has been reported elsewhere,[12] but in brief, the  
43  
44 multicomponent intervention was developed by combining evidence from the literature with  
45  
46 views from key stakeholders (including parents, teachers, school nurses, dieticians,  
47  
48 community leaders, school governors, and retail and leisure representatives close to schools)  
49  
50 and a multi-disciplinary group of relevant professionals. Important contextual data were  
51  
52 gained from stakeholders, which was critical for informing intervention development.[19] A  
53  
54 review of local facilities, resources and opportunities related to healthy eating and the  
55  
56 promotion of physical activity targeting children was used to inform the design and  
57  
58  
59  
60



1  
2  
3 encourage longer term sustainability of the intervention. We also took account of national  
4  
5 childhood obesity prevention policy during the development process to try and ensure that the  
6  
7 intervention had an impact that was additional to existing national initiatives. The  
8  
9 intervention targeted both diet and physical activity behaviours and consisted of two main  
10  
11 strands: i) increasing children's physical activity levels and promoting healthy eating through  
12  
13 schools, and ii) increasing skills among family members through family educational  
14  
15 activities. A number of intervention techniques (as defined in the CALO-RE Taxonomy of  
16  
17 behaviour changed techniques for physical activity and healthy eating[20]) were utilised to  
18  
19 deliver each intervention component. A more detailed description of the intervention is  
20  
21 provided in Table 1.  
22  
23  
24  
25  
26  
27  
28  
29  
30  
31  
32  
33  
34  
35  
36  
37  
38  
39  
40  
41  
42  
43  
44  
45  
46  
47  
48  
49  
50  
51  
52  
53  
54  
55  
56  
57  
58  
59  
60

**Table 1: Intervention components and techniques<sup>20</sup> included in the BEACHeS intervention programme and findings from the process evaluation**

| Intervention component                                        | Aim                                                                                                          | Intervention techniques                                                                                                                         | Description                                                                                                                                                                                                                                                                                                                                                                                 | Evaluation method                                                                                                                                                                                                                                     | Evaluation findings                                                                                                                                                                                                                                                                                                                                                                                                      |
|---------------------------------------------------------------|--------------------------------------------------------------------------------------------------------------|-------------------------------------------------------------------------------------------------------------------------------------------------|---------------------------------------------------------------------------------------------------------------------------------------------------------------------------------------------------------------------------------------------------------------------------------------------------------------------------------------------------------------------------------------------|-------------------------------------------------------------------------------------------------------------------------------------------------------------------------------------------------------------------------------------------------------|--------------------------------------------------------------------------------------------------------------------------------------------------------------------------------------------------------------------------------------------------------------------------------------------------------------------------------------------------------------------------------------------------------------------------|
| <b>School based activities</b>                                |                                                                                                              |                                                                                                                                                 |                                                                                                                                                                                                                                                                                                                                                                                             |                                                                                                                                                                                                                                                       |                                                                                                                                                                                                                                                                                                                                                                                                                          |
| Physical activities within school day                         | To increase the amount of time that children are physically active within the school day                     | Environmental restructuring<br>Prompt practice                                                                                                  | Three elements introduced into schools:<br>1. 'Wake Up Shake Up': a short (10 minutes) organised daily dance or exercise routine to music<br>2. Organised playground activities at lunch and break times through the training of school staff to act as "play leaders"<br>3. 'Take 10': teaching resource which links 10 minutes physical activity in the classroom to curricular subjects. | <ul style="list-style-type: none"> <li>• Interviews with school staff</li> <li>• Observation of sessions in schools</li> <li>• Self-completion questionnaires administered to children and parents</li> </ul>                                         | Overall, school staff with a responsibility for health were enthusiastic and committed to introducing these schemes, and all schemes were acceptable to children. Individual school and staff factors strongly influence the success of each element in the different schools. Parents, in general felt that the amount of physical activity their children were undertaking in school had increased over the last year. |
| Incentive scheme to encourage physical activity out of school | To increase the amount of time outside of school hours that children spend doing leisure physical activities | Prompt self monitoring of behaviour<br>Prompt practice<br>Provide rewards contingent on successful behaviour                                    | Children received a sticker collection card from school and information on local participating sports and leisure venues. Each time a child attended a venue, they collected a sticker. The child with the most stickers in each school received a prize.                                                                                                                                   | <ul style="list-style-type: none"> <li>• Interviews with school staff</li> <li>• Telephone survey of leisure venue staff</li> <li>• Assessment of returned collection cards</li> <li>• Questionnaires to children</li> </ul>                          | Although this type of incentive scheme appears acceptable to children, parents and school staff alike, it was not feasible in terms of maintaining cooperation of participating venues. An element that was well received and could be retained, is the signposting information given to children and families.                                                                                                          |
| Attendance at a course run by a Premier league football club  | To encourage physical activity and healthy eating through an iconic sporting institution                     | Provide information on consequences of behaviour<br>Model/demonstrate behaviour<br>Prompt identification of role model/advocate<br>Goal setting | School classes attend a 'Villa Vitality' day. Half the day is spent with Football Club coaches, exercising and learning football skills, and the other half of the day is an interactive learning session on healthy eating and healthy lifestyles. Teachers provided with material to deliver over 6 weeks to reinforce messages, and                                                      | <ul style="list-style-type: none"> <li>• Interviews with school staff</li> <li>• Self-completion questionnaires to parents</li> <li>• Pre- and 6-week post intervention questionnaires (knowledge, attitudes &amp; behaviour) administered</li> </ul> | This was highly acceptable to children and school staff and is feasible to deliver to the target age group. There is some evidence that it may favourably alter children's health-behaviours.                                                                                                                                                                                                                            |

(behaviour) encourage weekly challenges or goals. to children

### Increasing skills of families through activity-based learning

|                                                                    |                                                                               |                                                                                                                            |                                                                                                                                                                                         |                                                                                                                                                                                                                                                                                                                                  |                                                                                                                                                                                             |                                                                                                                                                                                                                                                                                                                             |
|--------------------------------------------------------------------|-------------------------------------------------------------------------------|----------------------------------------------------------------------------------------------------------------------------|-----------------------------------------------------------------------------------------------------------------------------------------------------------------------------------------|----------------------------------------------------------------------------------------------------------------------------------------------------------------------------------------------------------------------------------------------------------------------------------------------------------------------------------|---------------------------------------------------------------------------------------------------------------------------------------------------------------------------------------------|-----------------------------------------------------------------------------------------------------------------------------------------------------------------------------------------------------------------------------------------------------------------------------------------------------------------------------|
| 8<br>9<br>10<br>11<br>12<br>13<br>14<br>15<br>16<br>17<br>18<br>19 | Cooking courses for family members                                            | To increase healthy cooking skills and confidence and influence dietary behaviour                                          | Provide information on consequences of behaviour in general<br>Model/demonstrate behaviour<br>Provide instruction on how to perform the behaviour<br>Prompt generalisation of behaviour | Five week courses on healthy cooking were delivered through schools to parents or other family members, some courses include children. Courses ran successively to allow all parents to attend if they wanted. Healthy recipes were distributed to support the course content.                                                   | <ul style="list-style-type: none"> <li>• Interviews with school staff</li> <li>• Uptake rates for courses</li> <li>• Participant pre and post-course questionnaires</li> </ul>              | This component was popular with those who participated and there was some evidence that it influenced confidence and cooking practices. Running sessions for parents and children was the most popular model, and having the sessions based in school time for children and inviting parents to attend improved attendance. |
| 20<br>21<br>22<br>23<br>24<br>25<br>26<br>27<br>28<br>29           | Information on local leisure opportunities and “taster” sessions for families | To equip families with the knowledge and skills to undertake physical activities with their children in their leisure time | Provide information on when and where to perform behaviour<br>Model/demonstrate behaviour                                                                                               | Parents were given information on local sporting and leisure venues and events. They were invited to attend weekend taster sessions with their children, through school. Activities range from cricket and football, to archery, climbing and dry-slope skiing. There was no cost for the activities and transport was provided. | <ul style="list-style-type: none"> <li>• Interviews with school staff</li> <li>• Uptake of the taster sessions</li> <li>• Self-completion questionnaires to parents and children</li> </ul> | This component was resource intensive to deliver, and uptake was very low. However, the signposting information was used by families, and was appreciated.                                                                                                                                                                  |
| 30<br>31<br>32<br>33<br>34<br>35<br>36<br>37                       | Training walk leaders to initiate community walking programmes                | To increase walking by families and other community members through organised leisure walks                                | Model/demonstrate behaviour<br>Prompt practice                                                                                                                                          | Community volunteers were recruited through schools to become trained walk leaders. Training was provided to equip volunteers to organise and lead walks in their local community.                                                                                                                                               | <ul style="list-style-type: none"> <li>• Assessment of numbers attending training to be walk leaders</li> <li>• Monitoring numbers joining walking groups</li> </ul>                        | This component proved unfeasible, as there was a lack of volunteers. Even those who expressed an initial interest failed to attend the training. Despite repeated efforts to recruit community volunteers, no one attended the training in any of the four BEACHes intervention communities.                                |

### *Allocation of intervention*

This was a non-randomised feasibility trial. Intervention allocation was by school, matching pairs of schools by size, geographical location and proportion of children eligible for FSM.

The pairs were then randomly allocated to intervention or control arm.

### *Process measures*

The main aim of the study was to assess intervention feasibility and acceptability. Each component was evaluated separately, using a variety of methods. These included collection of uptake data, direct observation, questionnaires to children and parents and interviews with key school staff. The questionnaires were also used to evaluate overall perceptions of the intervention and engagement with different intervention components. Topics covered in the semi-structured interviews included exploration of how the different intervention components were implemented, which elements were perceived to work well and ideas for further development. The interviews were tape-recorded, transcribed and analysed thematically.

### *Other measures and analysis*

We assessed the feasibility of obtaining outcome data, primarily body mass index (BMI), but also diet and physical activity and other anthropometric measures as described above.

Exploratory comparison between intervention and control children was also undertaken to determine effect size.

Height and weight data were used to calculate BMI ( $\text{kg}/\text{m}^2$ ) and converted into standard deviation scores (BMI z-score) using the UK 1990 growth reference charts.[21] Children were categorised as underweight, healthy weight, overweight or obese using the 2<sup>nd</sup>, 85<sup>th</sup> and 95<sup>th</sup> centile cut-offs. For waist circumference and skinfolds, the mean was used for analyses. Skinfold measures were combined to obtain sum, upper (biceps, triceps and subscapular) and lower (suprailiac and thigh) skinfolds.

1  
2  
3 Data from the CADET were coded and analysed by a food diary analysis program (DANTE,  
4 University of Leeds) to estimate total energy intake (Kcal) and amount of fruit and  
5 vegetables, and sugar consumed. Data on foods consumed in school and at home were  
6 analysed separately, then combined to obtain estimates for the complete 24 hour  
7 measurement period.  
8  
9

10  
11 Accelerometry data were used to assess physical activity levels ([http://www.mrc-epid.cam.ac.uk/Research/Programmes/Programme\\_5/InDepth/Programme%205\\_Downloads.html](http://www.mrc-epid.cam.ac.uk/Research/Programmes/Programme_5/InDepth/Programme%205_Downloads.html)). Total daily volume of physical activity was estimated and expressed as average counts  
12 per minute (cpm). The mean duration of daily moderate to vigorous physical activity  
13 (MVPA, min/day) was calculated (400 cpm cut-off for lower threshold).[22] The proportion  
14 participating in  $\geq 60$  minutes MVPA (as recommended by international guidelines) was also  
15 calculated.  
16  
17

18  
19 The intraclass correlation coefficient (ICC) for the main outcome (BMI z-score) was  
20 calculated, but because of the small number of schools, clustering was not taken into account  
21 for the analysis. We analysed final BMI, diet and physical activity levels of children in the  
22 intervention, compared with those in the control group, adjusted for baseline measures. We  
23 used multivariate analysis to adjust for potential confounders (age, sex, ethnicity and baseline  
24 values). Logistic regression was used to assess risk of obesity, and likelihood of meeting  $\geq 60$   
25 minutes MVPA at follow up in the intervention, compared with control children.  
26  
27

### 28 ***Ethical approval***

29  
30 Ethical approval was granted by The Black Country Research Ethics Committee  
31 (08/H1202/22). Approval was sought for active consent from parents for the child  
32 measurements, whilst consent for participation in the intervention was at school level.  
33  
34  
35  
36  
37  
38  
39  
40  
41  
42  
43  
44  
45  
46  
47  
48  
49  
50  
51  
52  
53  
54  
55  
56  
57  
58  
59  
60

## Results

### *Feasibility and acceptability of intervention components*

Some intervention components (particularly those delivered through school) were more successfully delivered than others. Intervention was modified during the course of delivery to optimise participation and in response to feedback. The findings are summarised in Table 1, and details are reported in the appendix.

Two intervention components were found to be unsuitable to include within an intervention programme in the format delivered. First was the scheme to incentivise out of school leisure activities. Poor co-operation from leisure venues and lack of resources to continually remind and motivate children contributed to the failure of this component. Second was the training of walk leaders. Despite effort to recruit through school staff, influential parents and various forms of publicity, volunteers were not forthcoming. The only person who underwent training did not undertake any walking groups.

One component was partially successful. Signposting of leisure facilities in the local area was popular among parents and school staff. However, attendance at organised taster sessions was poor, which was outweighed by the high staff and monetary resources required to deliver the component. The taster sessions were therefore not feasible to include in a larger trial.

The other intervention components had varying degrees of success, and the process evaluation highlighted how delivery could be improved. Individual school characteristics and differences between staff members strongly influenced the success of each element in the different schools.

### *Acceptability of allocation to control*

Acceptability of non-intervention was assessed through interviews with control school staff. All understood the need for a control arm. One would have liked alternative support to compensate for not being offered the intervention. In other control schools, staff expressed that being part of the study had benefitted them in other ways, and contributed to the school's status as a 'healthy school'.

### *Outcomes*

#### *Feasibility of outcome measures*

There were 1090 eligible children in the eight participating schools (range 54-180). Of these, 606 (55.6%) had parental consent and anthropometric measures were completed on those in school on measurement days (n=571, 94.2% of consented). Useable data ( $\geq 3$  days) for Actiheart were available for 508 (89.0%). Completion of CADET was more variable. Although 445 (77.9%) were returned at baseline, 269 (47.1%) were complete, of which two thirds (n=174) had usable data. Two years after the baseline measures, 488 children (85.5%) were successfully followed up. The proportion with usable Actiheart data was similar to baseline. However a higher proportion (n=454, 93%) had a completed CADET, although only 163 (36%) had usable home data.

#### *Findings from exploratory trial*

A total of 574 children were included in the trial (Figure 1), of whom 85.9% were SA. Baseline characteristics are summarised in Table 2 (anthropometric measures were completed for 571 of the 574 participating children). The age, sex and ethnicity of those who took part were similar in distribution to the characteristics of the non-consented eligible children.

1  
2  
3 Over 90% in both arms were from the most deprived areas, in keeping with the location and  
4 ethnic composition of the population. Around one in five (n=115) were overweight or obese.  
5  
6 This proportion was slightly higher in the control (21.7%) compared to the intervention  
7 (18.3%) schools, mainly due to a higher prevalence of overweight. A similar pattern was seen  
8  
9 for other measures of body fat (skinfold measures, bioimpedance), but not for waist  
10 circumference which was similar in intervention and control groups. Under half of the  
11 children (47.9%) undertook  $\geq 60$  minutes of MVPA. Levels of physical activity (total cpm)  
12 and duration of time spent in MVPA were slightly higher among children from control,  
13 compared with intervention schools. Total dietary energy, fruit and vegetable and sugar  
14 intake were slightly higher among children in intervention, compared with control schools.  
15  
16 Two-years post baseline, 254 (83.3%) children in the control and 234 (86.2%) in the  
17 intervention schools were successfully followed up. There was no significant difference in  
18 baseline weight status, MVPA, diet or sex, between those followed up, and those lost to  
19 follow up (data not shown). However, SA children were less likely to be lost to follow up  
20 (n=58; 11.9%) compared with those from other ethnic groups (n=28; 34.6%).  
21  
22  
23  
24  
25  
26  
27  
28  
29  
30  
31  
32  
33  
34  
35  
36  
37  
38  
39  
40  
41  
42  
43  
44  
45  
46  
47  
48  
49  
50  
51  
52  
53  
54  
55  
56  
57  
58  
59  
60



**Table 2: Baseline characteristics of children measured for the BEACHes exploratory trial**

|                                          | Intervention group (N=269) | Control group (N=305) |
|------------------------------------------|----------------------------|-----------------------|
| Sex : Number (%)                         |                            |                       |
| Male                                     | 144 (53.5)                 | 142 (49.8)            |
| Female                                   | 125 (46.5)                 | 153 (50.2)            |
| Mean age in years (SD)                   | 6.53 (0.59)                | 6.44 (0.58)           |
| Ethnicity: Number (%)                    |                            |                       |
| Bangladeshi                              | 36 (13.4)                  | 46 (15.1)             |
| Indian                                   | 22 (8.2)                   | 5 (1.6)               |
| Pakistani                                | 181 (67.3)                 | 203 (66.6)            |
| Other                                    | 30 (11.2)                  | 51 (16.7)             |
| Townsend score decile: Number (%)        |                            |                       |
| 1 (most deprived)                        | 250 (93.3)                 | 285 (93.8)            |
| 2                                        | 6 (2.2)                    | 9 (3.0)               |
| 3                                        | 8 (3.0)                    | 5 (1.6)               |
| Mean BMI-SDS score (SD)                  | -0.03 (1.37)               | 0.08 (1.39)           |
| Weight status: Number (%)                |                            |                       |
| Underweight                              | 6 (2.3)                    | 10 (3.3)              |
| Healthy weight                           | 212 (79.4)                 | 228 (75.0)            |
| Overweight                               | 15 (5.6)                   | 27 (8.9)              |
| Obese                                    | 34 (12.7)                  | 39 (12.8)             |
| Mean waist circumference in cm (SD)      | 55.6 (7.7)                 | 55.3 (6.9)            |
| Skinfold measures in mm: mean (SD)       |                            |                       |
| Biceps                                   | 7.5 (3.6)                  | 8.0 (4.0)             |
| Triceps                                  | 10.9 (4.1)                 | 11.6 (4.5)            |
| Subscapular                              | 7.5 (4.4)                  | 7.9 (5.0)             |
| Suprailiac                               | 7.0 (4.4)                  | 7.4 (4.7)             |
| Sum of 4 skinfolds                       | 32.5 (14.7)                | 34.8 (16.8)           |
| Thigh                                    | 14.4 (5.5)                 | 15.7 (6.3)            |
| Sum of upper skinfolds                   | 25.7 (10.9)                | 27.5 (12.5)           |
| Sum of lower skinfolds                   | 21.0 (8.8)                 | 22.9 (10.1)           |
| Mean (SD) bioimpedance ( $\Omega$ )      | 692.6 (72.5)               | 695.1 (80.8)          |
| Physical activity (SD)                   |                            |                       |
| Mean counts/min                          | 79.9 (23.4)                | 83.4 (27.3)           |
| Mean MVPA min/24h                        | 52.8 (28.4)                | 62.9 (25.0)           |
| Number (%) achieving $\geq 60$ mins MVPA | 100 (40.2)                 | 156 (54.5)            |
| 1 day school dietary intake (SD)         |                            |                       |
| Mean energy (Kcal)                       | 568.4 (387.0)              | 458.2 (435.4)         |
| Fruit and vegetables (grams)             | 140.6 (121.4)              | 105.8 (118.7)         |
| Sugar (grams)                            | 41.0 (60.9)                | 35.3 (62.9)           |
| 1 day home dietary intake (SD)           |                            |                       |
| Mean energy (Kcal)                       | 1678.12 (760.30)           | 1555.53 (750.04)      |
| Fruit and vegetables (grams)             | 329.85 (232.23)            | 267.95 (193.27)       |
| Sugar (grams)                            | 105.36 (50.20)             | 93.50 (36.63)         |
| 24h dietary intake: Mean (SD)            |                            |                       |
| Total energy (Kcal)                      | 2229.1 (909.1)             | 2007.0 (964.5)        |
| Fruit and vegetables (grams)             | 475.6 (261.4)              | 368.7 (220.2)         |
| Sugar (grams)                            | 154.1 (108.7)              | 129.7 (85.8)          |

### *Estimation of effect size to inform definitive trial*

At follow up, the proportion of children who were overweight or obese had increased in all schools (from 7.3% to 9.9%, and from 12.8% to 19.1% for overweight and obese respectively). The risk of obesity was significantly lower in the intervention compared with the control group (OR 0.41; 0.19 to 0.89). The increase in BMI z-score was also significantly lower in the intervention compared with control, after adjustment [-0.15kg/m<sup>2</sup> (-0.27, -0.03)] (Table 3). A similar trend was seen for all other anthropometric measures, although none were statistically significant.

The ICC for the outcome “overweight/obese” compared to non-overweight, was 0.00 (95% CI (0, 0.02)), whilst for BMI z-score, the ICC was 0.01 (95% CI (0, 0.04)). Therefore, taking account of clustering in the analysis would make marginal difference to the findings.

The proportion of children who undertook  $\geq 60$  minutes MVPA reduced (from 48.8% to 27.1%) at follow up, with the reduction being greater among control (30.2%) compared with intervention (23.8%) children. The differences in physical activity levels at follow up were not significant between groups (Table 3).

Total calorific intake had increased slightly at follow up (1786 Kcal at baseline to 1943 Kcal at follow up). There were no significant differences in dietary intake between control and intervention children, although 24 hour dietary intake data were only available for 33%.

However, school dietary intake data were more complete (93%), and children in intervention schools had significantly more fruits and vegetables and lower sugar intake, compared with those in control schools (Table 3).

**Table 3: Anthropometric, diet and physical activity measures at follow up, and adjusted difference in measures between control and intervention groups**

|                                 | Intervention group<br>(N=234) | Control group<br>(N=254) | Intervention vs. Control<br>(adjusted for baseline) | p value | Intervention vs. Control<br>(finally adjusted)* | p value |
|---------------------------------|-------------------------------|--------------------------|-----------------------------------------------------|---------|-------------------------------------------------|---------|
| <i>Number (%)</i>               |                               |                          | <i>OR (95% CI)</i>                                  |         | <i>Adjusted* OR (95% CI)</i>                    |         |
| Obese                           | 36 (15.4)                     | 57 (22.4)                | 0.36 (0.17, 0.77)                                   | 0.01    | 0.41 (0.19, 0.89)                               | 0.02    |
| Achieving ≥60 mins MVPA         | 53 (23.6)                     | 73 (30.2)                | 0.82 (0.52, 1.28)                                   | 0.38    | 0.74 (0.45, 1.20)                               | 0.22    |
| <i>Mean (SD)</i>                |                               |                          | <i>B (95%CI)</i>                                    |         | <i>Adjusted* B (95%CI)</i>                      |         |
| <b>Anthropometric measures</b>  |                               |                          |                                                     |         |                                                 |         |
| BMI z-score                     | 0.13 (1.5)                    | 0.40 (1.5)               | -0.15 (-0.26, -0.03)                                | 0.02    | -0.15 (-0.27, -0.03)                            | 0.02    |
| Waist circumference (cm)        | 59.4 (9.5)                    | 60.4 (9.1)               | -0.88 (-1.87, 0.10)                                 | 0.08    | -0.86 (-1.87, 0.15)                             | 0.09    |
| Skinfold measures (mm)          |                               |                          |                                                     |         |                                                 |         |
| Biceps                          | 6.9(3.5)                      | 7.7 (3.8)                | -0.48 (-0.98, 0.01)                                 | 0.06    | -0.44 (-0.93, 0.06)                             | 0.08    |
| Triceps                         | 11.2 (4.8)                    | 11.9 (4.6)               | -0.14 (-0.68, 0.40)                                 | 0.61    | -0.10 (-0.64, 0.45)                             | 0.71    |
| Subscapular                     | 8.5 (5.3)                     | 9.3 (5.8)                | -0.46 (-0.98, 0.06)                                 | 0.09    | -0.38 (-0.89, 0.14)                             | 0.15    |
| Suprailiac                      | 8.8 (5.9)                     | 9.4 (5.9)                | -0.23 (-0.84, 0.37)                                 | 0.45    | -0.23 (-0.83, 0.37)                             | 0.46    |
| Sum of 4 skinfolds              | 35.2 (18.1)                   | 37.6 (18.4)              | -1.09 (-2.85, 0.67)                                 | 0.23    | -0.97 (-2.70, 0.77)                             | 0.27    |
| Thigh                           | 17.3 (7.5)                    | 18.9 (8.1)               | -0.31 (-1.39, 0.78)                                 | 0.58    | -0.27 (-1.38, 0.84)                             | 0.63    |
| Sum of upper skinfolds          | 26.5 (12.7)                   | 28.7 (13.1)              | -0.90 (-2.21, 0.42)                                 | 0.18    | -0.76 (-2.05, 0.53)                             | 0.25    |
| Sum of lower skinfolds          | 25.3(11.8)                    | 27.6 (13.1)              | -0.36 (-1.91, 1.19)                                 | 0.65    | -0.40 (-1.98, 1.18)                             | 0.62    |
| Bioimpedance (Ω)                | 692.0 (83.1)                  | 688.3 (81.3)             | 3.33 (-5.23, 11.89)                                 | 0.45    | 3.50 (-5.14, 12.15)                             | 0.43    |
| <b>Physical activity levels</b> |                               |                          |                                                     |         |                                                 |         |
| Counts/min                      | 68.7 (33.4)                   | 71.0 (22.9)              | -0.15 <sup>#</sup> (-0.34, 0.04)                    | 0.12    | -0.18 <sup>#</sup> (-0.36, 0.01)                | 0.06    |
| MVPA min/24h                    | 49.1 (21.8)                   | 51.1 (20.2)              | 1.52 (-2.14, 5.17)                                  | 0.42    | 0.51 (-2.97, 3.99)                              | 0.77    |
| <b>Dietary intake</b>           |                               |                          |                                                     |         |                                                 |         |
| <i>School</i>                   |                               |                          |                                                     |         |                                                 |         |
| Energy (Kcal)                   | 456.2 (198.8)                 | 488.8 185.2)             | -18.83 (-57.54, 19.88)                              | 0.34    | -20.56 (-59.82, 18.69)                          | 0.30    |
| Fruit and vegetables (grams)    | 143.1 (135.0)                 | 93.9 (94.0)              | 59.88 (34.56, 85.19)                                | <0.001  | 3.35 (37.53, 89.17)                             | <0.001  |
| Sugar (grams)                   | 25.0 (15.7)                   | 29.8 (16.7)              | -3.86 (-7.27, -0.45)                                | 0.03    | -3.86 (-7.37, -0.36)                            | 0.03    |

|                            | Intervention group<br>(N=234) | Control group<br>(N=254) | Intervention vs. Control<br>(adjusted for baseline) | p value | Intervention vs. Control<br>(finally adjusted)* | p value |
|----------------------------|-------------------------------|--------------------------|-----------------------------------------------------|---------|-------------------------------------------------|---------|
| <b>Home</b>                |                               |                          |                                                     |         |                                                 |         |
| Energy (Kcal)              | 1878.7 (1043.6)               | 1946.8 (957.1)           | 316.19 (-69.97, 702.34)                             | 0.12    | 366.81 (-28.14, 761.76)                         | 0.07    |
| Fruit & vegetables (grams) | 367.5 (316.6)                 | 342.0 (224.9)            | 21.61 (-81.26, 124.47)                              | 0.68    | 18.98 (-89.43, 127.40)                          | 0.73    |
| Sugar (grams)              | 113.8 (63.7)                  | 121.0 (56.8)             | 6.88 (-17.04, 30.81)                                | 0.57    | 9.17 (-15.16, 33.51)                            | 0.45    |
| <b>24h dietary intake</b>  |                               |                          |                                                     |         |                                                 |         |
| Energy (Kcal)              | 2277.2 (1051.7)               | 2347.2 (901.8)           | 211.08 (-212.31, 634.48)                            | 0.32    | 261.08 (-172.88, 695.05)                        | 0.23    |
| Fruit & vegetables (grams) | 519.1 (350.2)                 | 446.0 (238.5)            | 89.64 (-32.51, 211.79)                              | 0.15    | 86.70 (-42.92, 216.32)                          | 0.19    |
| Sugar (grams)              | 137.2 (64.2)                  | 150.5 (59.9)             | 3.16 (-22.74, 29.07)                                | 0.81    | 4.23 (-22.00, 30.47)                            | 0.75    |

\*Adjusted for sex, ethnicity and baseline values

# B calculated for increase of 20 count/min

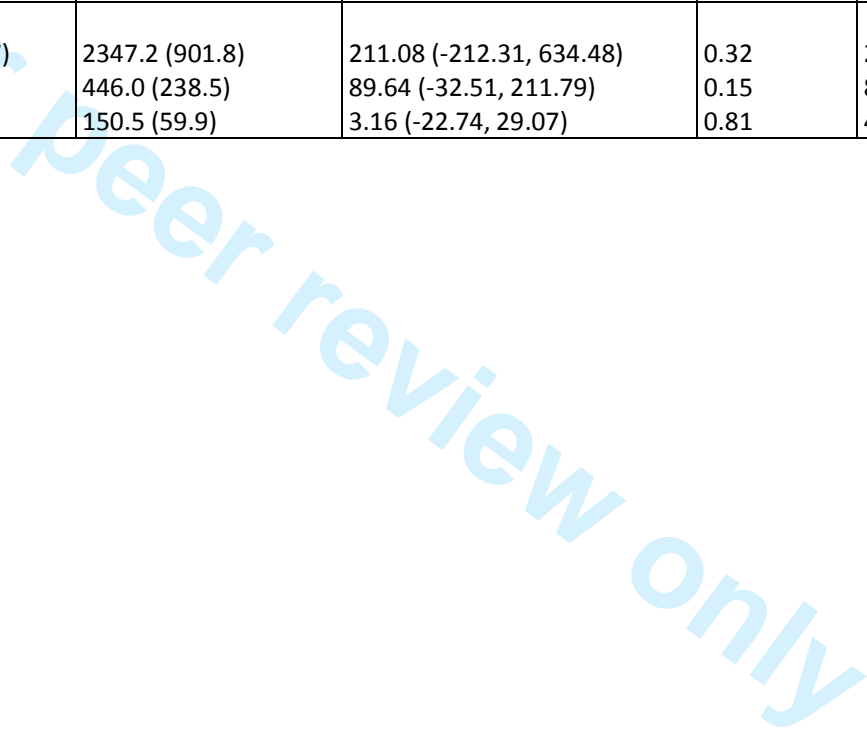

1  
2  
3  
4  
5  
6  
7  
8  
9  
10  
11  
12  
13  
14  
15  
16  
17  
18  
19  
20  
21  
22  
23  
24  
25  
26  
27  
28  
29  
30  
31  
32  
33  
34  
35  
36  
37  
38  
39  
40  
41  
42  
43  
44  
45  
46  
47  
48  
49

## Discussion

We demonstrated the feasibility of delivering a multicomponent obesity prevention intervention targeting dietary and physical activity behaviours to a socioeconomically disadvantaged, multiethnic population of primary school aged children. The exploratory trial provided an opportunity to refine and modify the programme and yielded important information on acceptability and feasibility of both the intervention and measurements required for assessing outcomes in a definitive RCT.

### *Strengths and limitations*

This is one of few studies focusing on SA populations, which comprise the largest minority ethnic group in the UK, with higher risk of obesity and its consequences. The iterative process of intervention refinement was informed by the MRC framework for complex interventions. Whilst the framework has been used for development of other interventions in NHS settings, we have demonstrated its use in the wider community setting.

The components of the intervention were influenced by stakeholder views and available resources, thus its applicability for wider populations and settings is potentially limited. However, the multifaceted intervention aimed to modify school and family environments and included elements that have been identified as promising in systematic reviews.[7,23] Furthermore the intervention components have theoretical validity for behaviour change in any population, and the incorporated techniques are transferrable. The targeting of South Asian stakeholders for intervention development is likely to have allowed us to exclude intervention components that would not be acceptable to this sub-population. Nevertheless, the developed intervention is likely to be acceptable not only in these ethnic groups, but also in the wider UK population.

Delivery of intervention, undertaken by staff outside the research team, was non-standardised. This allowed a pragmatic approach to be tested, which could be more easily rolled out.

During the trial, all children in schools allocated to the intervention arm were exposed to the intervention components. However, only about half had consent for measurements. We found no significant

1  
2 differences in sex and ethnicity between consented and non-consented children. Further, the distribution  
3  
4 of weight status among children who were measured is similar to national data for this age group[24],  
5  
6 suggesting that selection bias was unlikely.  
7  
8

### 9 10 *Intervention acceptability and feasibility*

11  
12 A variety of intervention techniques were incorporated with variable success. Environmental restructuring  
13  
14 (structured physical activity and play opportunities in school) was feasible and generally accepted.

15  
16 Demonstration of the target behaviour and prompting practice (Villa Vitality, cooking workshops, taster  
17  
18 activity sessions and walking groups) had mixed results. Apart from Villa Vitality which was  
19  
20 incorporated within the school setting, there was limited participation, despite enthusiasm amongst those  
21  
22 who did take part. At a population level, these types of intervention are less feasible to deliver, unless  
23  
24 they are incorporated within the school setting. Providing information and prompting identification of  
25  
26 role models were feasible and acceptable and would be replicable in a larger trial. Techniques to prompt  
27  
28 self monitoring and rewarding successful behaviour were acceptable, but had limited success in this  
29  
30 community setting.  
31  
32  
33  
34

35  
36 During the period of intervention delivery, we used a variety of methods and involved different  
37  
38 stakeholders (school staff, parents and children), to assess the acceptability of the intervention  
39  
40 components. We also allowed the programme to be modified and the implementation of elements to vary  
41  
42 in the different intervention schools. This tailoring to the local school context was critical in determining  
43  
44 the success of the intervention. For example in one school, lunchtime supervisors were trained to deliver a  
45  
46 structured physical activity programme at lunchtime, but did not go on to deliver the programme.

47  
48 Following this failure of implementation, an enthusiastic teaching assistant was trained, who successfully  
49  
50 delivered the intervention. Thus, whilst standardisation of aspects of the intervention is important, some  
51  
52 scope for tailoring to local context in terms of implementation and delivery needs to be considered.[25]  
53  
54  
55  
56  
57  
58  
59  
60

### *Informing a definitive RCT*

The intervention was aimed at predominantly SA populations residing in inner city settings. Despite challenges, including language barriers, 80% were successfully followed up. We demonstrated the feasibility of undertaking a wide range of anthropometric measures within school and the feasibility of Actiheart monitors for assessing physical activity in free living children (approximately 90% had usable data). Assessment of dietary intake was less successful at baseline, mainly due to language barriers and difficulties for parents in completing the forms, but the exploratory trial allowed us to refine the administration of the tool, so that measurement was more complete at follow up.

Although the exploratory trial was not powered to examine intervention outcomes, we did find that the direction of effect for most outcomes were in favour of the intervention, supporting the need for a definitive trial. In particular, at follow up children in intervention schools had BMI z-scores on average 0.15kg/m<sup>2</sup> lower than children in control schools, which is in keeping with the effect size reported in a meta-analysis of childhood obesity prevention trials.[7]

### **Conclusions**

We have used the MRC framework for complex interventions to develop a childhood obesity prevention intervention that can be evaluated within the context of a cluster-RCT. Although the intervention was informed by stakeholders, and evidence and guidelines from previous literature, some elements were found not to be feasible or acceptable to participants in practice. The exploratory trial was an essential step in finalising the intervention programme prior to definitive evaluation. Based on the findings from this study, a definitive cluster-RCT is currently underway to assess the clinical and cost-effectiveness of the finalised intervention in primary school children (ISRCTN97000586).

## Acknowledgements

S Passmore (Birmingham City Council) advised the study team on identification and engaging of schools and pupils, and the tailoring of interventions to be acceptable to schools.

M Howard (Heart of Birmingham PCT) facilitated the delivery of some of the intervention components through the Primary Care Trust.

E McGee (Birmingham Community Nutrition and Dietetic Service) oversaw the delivery of the cooking workshops and contributed to their evaluation.

K Westgate and S Mayle (MRC Epidemiology Unit, Cambridge) undertook cleaning, reducing and analysing the physical activity data.

C Cleghorn (University of Leeds) contributed to the development of the CADET, oversaw staff training and administration of the tool, and undertook cleaning and analysis of the dietary data.

The sponsor of the study (University of Birmingham) had no role in the study design, data collection, data analysis, data interpretation, writing of the report, or in the decision to submit the paper.

## Contributors Statement

Peymané Adab: Dr. Adab conceptualized and designed the study overall, oversaw study planning, delivery and evaluation, wrote the analysis plan and drafted and revised the paper and approved the final manuscript as submitted. She is a guarantor.

Miranda Pallan: Dr. Pallan assisted in the overall delivery of the study, designed the process evaluation, undertook the data cleaning and analysis. She has approved the final manuscript as submitted, and is also a guarantor.

Janet Cade: Professor Cade designed the dietary data assessment tool, oversaw training for researchers collecting data and the analysis of the dietary data obtained. She has approved the final manuscript as submitted.

Ulf Ekelund: Dr. Ekelund advised on physical activity assessment, provided training of researchers in collecting Actiheart data and oversaw the analysis of physical activity data from Actihearts. He has approved the final manuscript as submitted.

Timothy Barrett: Professor Barrett advised on anthropometric measurement tools used, arranged for training of research staff to undertaken measures and advised on interpretation of the anthropometric data obtained. He has approved the final manuscript as submitted.

Amanda Daley: Dr. Daley advised on physical activity components of the intervention and use of incentives to motivate children. She has approved the final manuscript as submitted.

Jonathan Deeks: Professor Deeks provided statistical support, advised on statistical analysis and on using the data obtained to inform sample size estimation for the definitive trial. He has approved the final manuscript as submitted.

Joan Duda: Professor Duda advised on the psychological measurement instruments, advised research staff on child protection issues and contributed to shaping the physical activity components of the intervention. She has approved the final manuscript as submitted.

Paramjit Gill: Dr. Gill advised on anthropometric measurements to be included, the sampling strategy and on ethnic minority health. He has approved the final manuscript as submitted.

Jayne Parry: Professor Parry advised on process evaluation and contributed to the interpretation of qualitative data obtained. She has approved the final manuscript as submitted.



1  
2  
3 Raj Bhopal: Professor Bhopal advised on the anthropometric measurements, definition of the target  
4 population, tailoring of the intervention to be culturally appropriate and relevant literature on ethnicity  
5 and health. He also provided important comments on the final draft and has approved the final manuscript  
6 as submitted.  
7

8  
9 Kar Keung Cheng: Professor Cheng conceived the original idea informing this study, contributed to the  
10 planning and delivery. He has approved the final manuscript as submitted.  
11

12 All authors have contributed to the design of the intervention, advised on study progress and critically  
13 revised and approved the final manuscript.  
14

### 15 **Conflict of Interest Statement**

16  
17 All authors declare there was no support from any organisation for the submitted work; no financial  
18 relationships with any organisations that might have an interest in the submitted work in the previous  
19 three years; no other relationships or activities that could appear to have influenced the submitted work.  
20 Amanda Daley is supported by an NIHR Senior Research Fellowship award. The other authors have no  
21 disclosures relevant to this article. The views expressed in this publication are those of the authors and not  
22 necessarily those of the NHS, The National Institute for Health Research or the Department of Health.  
23 Primary Care Clinical Sciences is a member of the NIHR National School for Primary Care Research.  
24 The funding organisation did not play any role in design and conduct of the study; collection,  
25 management, analysis, and interpretation of the data; and preparation, review, or approval of the  
26 manuscript.  
27  
28  
29

### 30 **Data Sharing Statement**

31  
32 The BEACHeS study dataset is available on request from the study investigators.  
33

### 34 **Funding source**

35  
36 The Birmingham healthy Eating, Active lifestyle for Children Study (BEACHeS) was funded by the  
37 National Prevention Research Initiative (NPRI, <http://www.npri.org.uk>), Grant no. G0501292 and we are  
38 grateful to all the funding partners for their support: British Heart Foundation; Cancer Research UK;  
39 Department of Health; Diabetes UK; Economic and Social Research Council; Medical Research Council;  
40 Research and Development Office for the Northern Ireland Health and Social Services; Chief Scientist  
41 Office, Scottish Executive Health Department; Welsh Assembly Government and World Cancer Research  
42 Fund.  
43  
44

45 **Clinical Trial Registration:** ISRCTN51016370  
46

### 47 **Licence for Publication Statement**

48  
49 “I Miranda Pallan, the Corresponding Author of this article contained within the original manuscript  
50 which includes any diagrams & photographs, other illustrative material, video, film or any other material  
51 howsoever submitted by the Contributor(s) at any time and related to the Contribution (“the  
52 Contribution”), have the right to grant on behalf of all authors and do grant on behalf of all authors, a  
53 licence to the BMJ Publishing Group Ltd and its licensees, to permit this Contribution (if accepted) to be  
54 published in BMJ Open and any other BMJ Group products and to exploit all subsidiary rights, as set out  
55 in the licence at: ([http://group.bmj.com/products/journals/instructions-for-authors/BMJOpen\\_licence.pdf](http://group.bmj.com/products/journals/instructions-for-authors/BMJOpen_licence.pdf))  
56  
57  
58  
59  
60

## References

- 1  
2  
3  
4  
5  
6 (1) Lobstein T, Baur L, Uauy R. Obesity in children and young people: a crisis in public health. *Obes Rev* 2004; **5**(Suppl. 1):4-85.
- 7  
8  
9  
10 (2) Baker JL, Olsen LW, Sorensen TIA. Childhood Body-Mass Index and the risk of coronary heart  
11 disease in adulthood. *N Engl J Med* 2007; **357**:2329-37.
- 12  
13 (3) Stamatakis E, Wardle J, Cole TJ. Childhood obesity and overweight prevalence trends in England:  
14 evidence for growing socioeconomic disparities. *Int J Obes* 2010; **34**:41-7.
- 15  
16 (4) NHS Information Centre for Health and Social Care. National Child Measurement Programme:  
17 England, 2011/12 school year. The Health and Social Care Information Centre, 2012.
- 18  
19 (5) Dinsdale H, Ridler C, Rutter H. National Child Measurement Programme: Changes in children's  
20 body mass index between 2006/7 and 2010/11. Oxford, National Obesity Observatory, 2012.
- 21  
22 (6) Summerbell CD, Waters E, Edmunds LD, et al. Interventions for preventing obesity in children.  
23 *Cochrane Database of Systematic Reviews* 2005, Issue 3, John Wiley & Sons, Ltd Chichester,  
24 UK, DOI: 10 1002/14651858 CD001871 pub2.
- 25  
26 (7) Waters E, de Silva-Sanigorski A, Hall B J, et al. Interventions for preventing obesity in children.  
27 *Cochrane Database of Systematic Reviews* 2011, Issue 12, John Wiley & Sons, Ltd Chichester,  
28 UK, DOI:10 1002/14651858 CD001871 pub3.
- 29  
30 (8) McPherson K, Marsh T, Brown M. Tackling obesities: future choices - modelling future trends in  
31 obesity and the impact on health. Report No. 2. London, Government Office for Science, 2007.
- 32  
33 (9) Wang Y, Wu Y, Wilson RF, et al. Childhood obesity prevention programs: comparative  
34 effectiveness review and meta-analysis. *Comparative Effectiveness Review* No. 115. Rockville,  
35 MD, Agency for Healthcare Research and Quality, 2013.
- 36  
37 (10) National Institute for Health and Clinical Excellence. Obesity: the prevention, identification,  
38 assessment and management of overweight and obesity in adults and children. London, 2006.
- 39  
40 (11) Campbell M, Fitzpatrick R, Haines A, et al. Framework for design and evaluation of complex  
41 interventions to improve health. *BMJ* 2000; **321**:694-6.
- 42  
43 (12) Pallan M, Parry J, Cheng KK, Adab P. Development of a childhood obesity prevention  
44 programme with a focus on UK South Asian Communities. *Prev Med* 2013; **57**:948-54.
- 45  
46 (13) Varni JW, Limbers CA, Burwinkle TM. How can young children reliably and validly self-report  
47 their health-related quality of life?: an analysis of 8,591 children across age subgroups with the  
48 PedsQL 4.0 generic core scales. *Health Qual Life Outcomes* 2007; **5**:1.
- 49  
50 (14) Marsh HW, Barnes J, Cairns L, Tidman M. Self-Description Questionnaire: Age and sex effects in  
51 the structure and level of self-concept for preadolescent children . *J Educ Psychol* 1984; **76**:940-  
52 56.
- 53  
54 (15) Harter S, Pike R. The pictorial scale of perceived competence and social acceptance for young  
55 children. *Child Dev* 1984; **55**:1969-82.
- 56  
57  
58  
59  
60

- 1  
2  
3  
4  
5  
6  
7  
8  
9  
10  
11  
12  
13  
14  
15  
16  
17  
18  
19  
20  
21  
22  
23  
24  
25  
26  
27  
28  
29  
30  
31  
32  
33  
34  
35  
36  
37  
38  
39  
40  
41  
42  
43  
44  
45  
46  
47  
48  
49  
50  
51  
52  
53  
54  
55  
56  
57  
58  
59  
60
- (16) Collins ME. Body figure perceptions and preferences among preadolescent children. *Int J Eat Disord* 1991; **10**:199-208.
- (17) Cade JE, Frear L, Greenwood DC. Assessment of diet in young children with an emphasis on fruit and vegetable intake: using CADET – Child and Diet Evaluation Tool. *Public Health Nutr* 2006; **9**:501-8.
- (18) Brage S, Brage N, Franks P, et al. Reliability and validity of the combined heart rate and movement sensor Actiheart. *Eur J Clin Nutr* 2005; **59**:561-70.
- (19) Pallan M., Parry J., Adab P. Contextual influences on the development of obesity in children: a case study of UK South Asian communities. *Prev Med* 2012; **54**:205-11.
- (20) Michie S, Ashford S, Sniehotta FF, et al. A refined taxonomy of behaviour change techniques to help people change their physical activity and healthy eating behaviours: the CALO-RE taxonomy. *Psychol Health* 2011; **26**:1479-98.
- (21) Cole TJ, Freeman JV, Preece MA. Body mass index reference curves for the UK, 1990. *Arch Dis Child* 1995; **73**:25-9.
- (22) Corder K, Brage S, Wareham NJ, et al. Comparison of PAEE from combined and separate HR and movement models in children. *Med Sci Sports Exerc* 2005; **37**:1761-7.
- (23) Lavelle HV, Mackay DF, Pell JP. Systematic review and meta-analysis of school-based interventions to reduce body mass index. *J Public Health* 2012; **34**:360-9.
- (24) National Obesity Observatory. National Child Measurement Programme: detailed analysis of the 2007/08 national dataset. London, 2009.
- (25) Hawe P, Shiell A, Riley T. Complex interventions: how "out of control" can a randomised controlled trial be? *BMJ* 2004; **328**:1561-3.

1  
2  
3  
4  
5  
6  
7  
8  
9  
10  
11  
12  
13  
14  
15  
16  
17  
18  
19  
20  
21  
22  
23  
24  
25  
26  
27  
28  
29  
30  
31  
32  
33  
34  
35  
36  
37  
38  
39  
40  
41  
42  
43  
44  
45  
46  
47  
48  
49  
50  
51  
52  
53  
54  
55  
56  
57  
58  
59  
60

**Figure 1: Flow diagram of recruitment and follow up of participants in the exploratory trial**

For peer review only

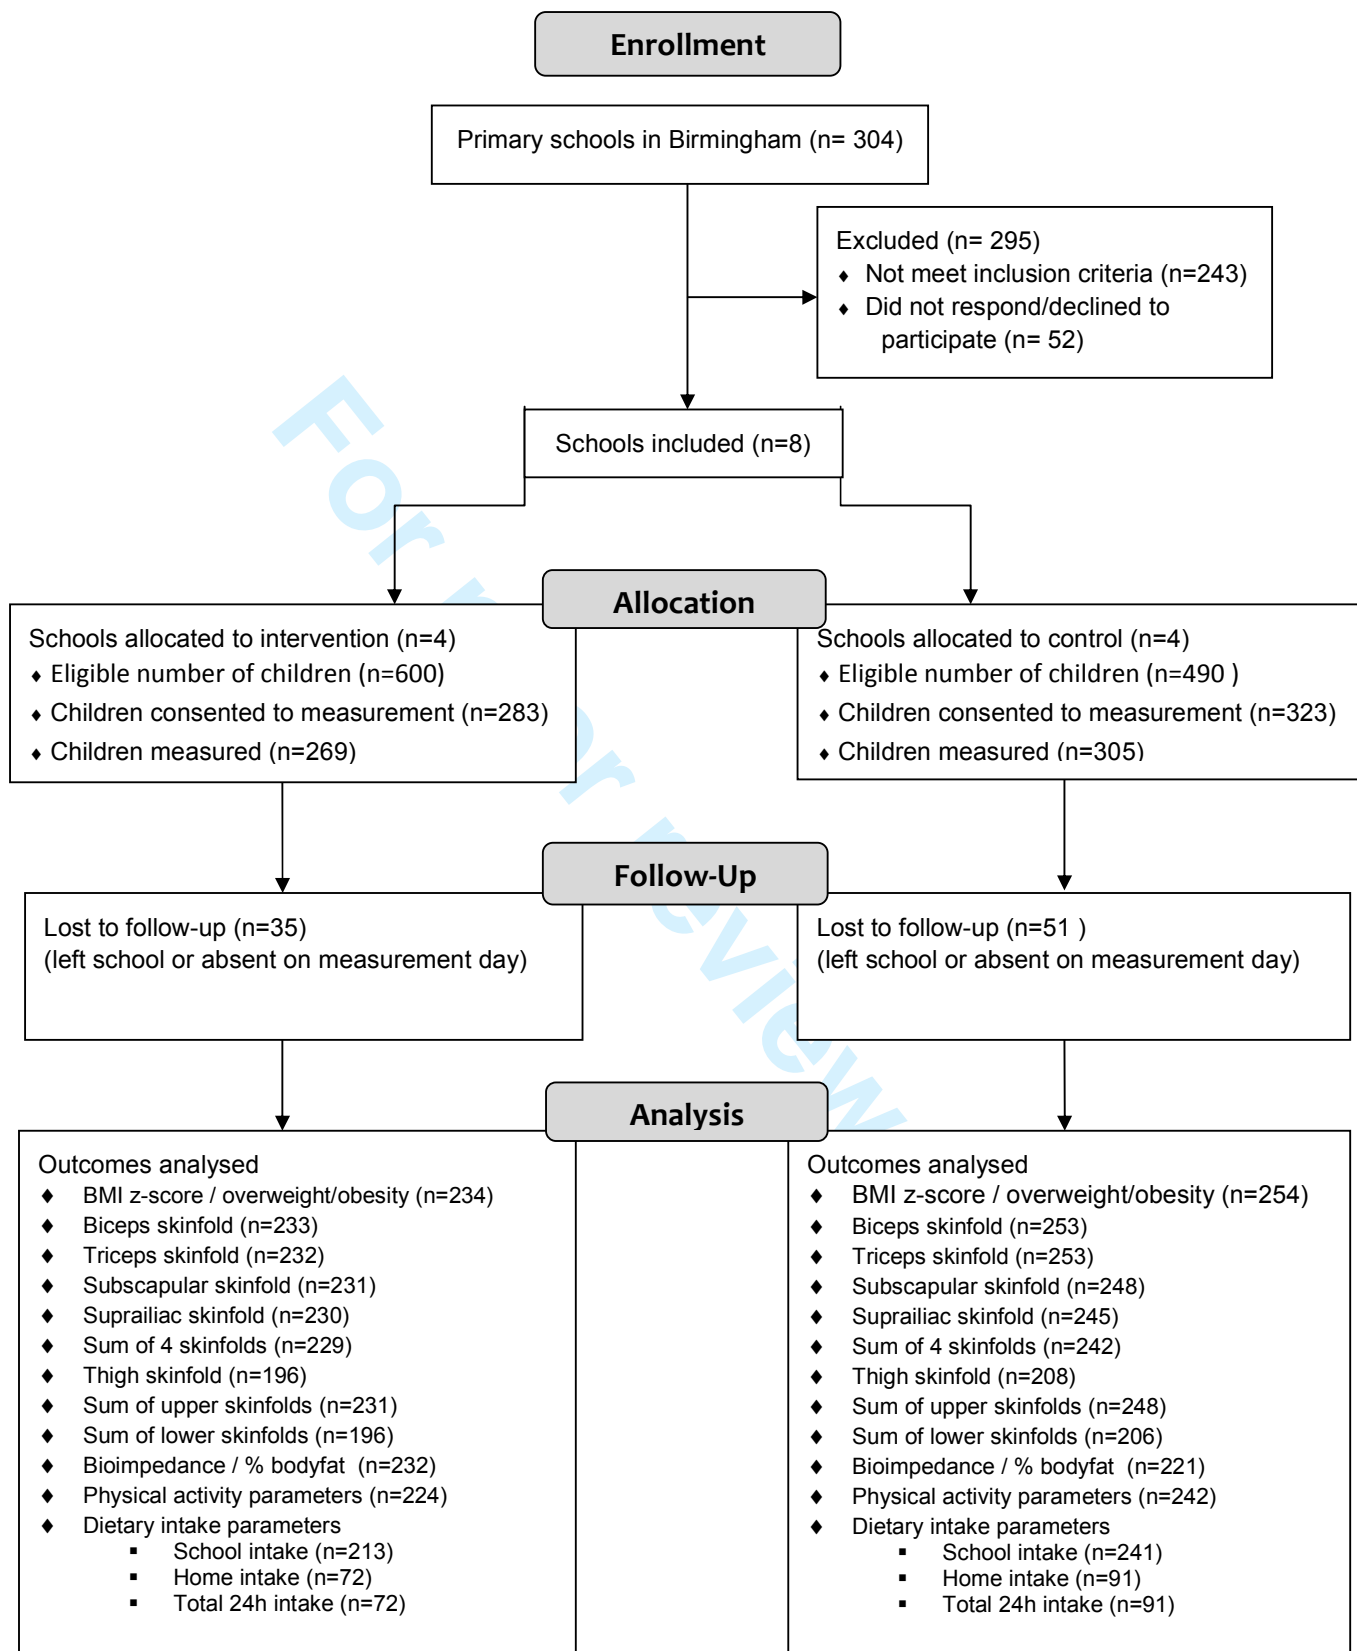

## Preventing childhood obesity, exploratory trial focusing on South Asians: BEACHEs

### Appendix: Detailed findings from the process evaluation of intervention components included in the BEACHEs programme

| Intervention component                                                  | Evaluation findings                                                                                                                                                                                                                                                                                                                                                                                                                                                                                                                                                                                                                                                                                                                                                                                                                                                                                                                                                                                                                                                                                                                                                                                                                                                                                                                                                                                                                                                                                                                                                                                                                                                                                                                                                                                                                                                                                                                                                                                                                                                                                                                                                                                                                                                                                                                                                                                                                                   |
|-------------------------------------------------------------------------|-------------------------------------------------------------------------------------------------------------------------------------------------------------------------------------------------------------------------------------------------------------------------------------------------------------------------------------------------------------------------------------------------------------------------------------------------------------------------------------------------------------------------------------------------------------------------------------------------------------------------------------------------------------------------------------------------------------------------------------------------------------------------------------------------------------------------------------------------------------------------------------------------------------------------------------------------------------------------------------------------------------------------------------------------------------------------------------------------------------------------------------------------------------------------------------------------------------------------------------------------------------------------------------------------------------------------------------------------------------------------------------------------------------------------------------------------------------------------------------------------------------------------------------------------------------------------------------------------------------------------------------------------------------------------------------------------------------------------------------------------------------------------------------------------------------------------------------------------------------------------------------------------------------------------------------------------------------------------------------------------------------------------------------------------------------------------------------------------------------------------------------------------------------------------------------------------------------------------------------------------------------------------------------------------------------------------------------------------------------------------------------------------------------------------------------------------------|
| <b>School based activities</b><br>Physical activities within school day | <p><b>“Wake Up Shake Up”:</b> 3 intervention schools implemented this to varying degrees (twice a day in one school, once or less in others). Participation by children was greater if session was compulsory rather than optional. Questionnaire responses from the children suggested that it was generally well received, although a few children were reluctant to join in. Staff were generally enthusiastic about running this, but identified lack of time and lack of space as potential barriers to success.</p> <p><i>“[Wake Up Shake Up is] really popular, going really well, parents are now starting to join in a lot more because the idea was that the parents would join in as well. So I am really pleased with how that’s coming on”</i> (teacher and school physical education lead)</p> <p><b>Organised playground activities:</b> All 4 schools received training and attempted to introduce this at lunch times. Implementation varied greatly between schools, with some schools not consistently being able to deliver. A key factor for successful implementation was having an enthusiastic member of staff to inspire the play leaders. The school that had the least success with implementation was where the lunchtime supervisors were trained as play leaders but did not have a member of staff to lead them. Provision of playground equipment and using a zoning system in the playground supported successful delivery. Children and staff indicated that they enjoyed the scheme and supported it.</p> <p><i>“What I have found with [a teaching assistant] going out, who’s doing like the parachute games and that with them is much better, because the dinner ladies just didn’t take it on board. I think they came to the training because they had to but it’s had no impact, I’ve got to be honest”</i> (deputy head teacher)</p> <p><b>Take 10 curricular materials:</b> 2 of the schools implemented this component. Success depended on the enthusiasm and motivation of the class teachers. Teachers who used Take 10 were keen to continue and expand its use. Some members of staff identified lack of training and familiarity with the material as barriers to its implementation.</p> <p><i>“I know it [Take 10] works really well, I know it’s really accessible....the only problems I have is with the staff doing it or not doing it”</i> (teacher and school physical education lead)</p> |
| Incentive scheme to encourage physical activity out of school           | <p>The major obstacle to the success of this component was retention of leisure venues and maintenance of enthusiasm. Most venues that were initially recruited no longer actively participated after 2-3 months. Staff turnover, change in management, high frequency of temporary staff, low perceived importance and lack of interest from leisure centre staff contributed to the failure of this component. School staff felt that incentive schemes were generally a good way of motivating children. However, in addition to problems with venue participation, other problems were identified. Teachers felt that motivation needed regular reinforcement (e.g. by class teachers), children</p>                                                                                                                                                                                                                                                                                                                                                                                                                                                                                                                                                                                                                                                                                                                                                                                                                                                                                                                                                                                                                                                                                                                                                                                                                                                                                                                                                                                                                                                                                                                                                                                                                                                                                                                                              |

|                                                                      |                                                                                        |                                                                                                                                                                                                                                                                                                                                                                                                                                                                                                                                                                                                                                                                                                                                                                                                                                                                                                                                                                                                                                                                                                                                                                                                                                                                                                                                                                                                                                                                                |
|----------------------------------------------------------------------|----------------------------------------------------------------------------------------|--------------------------------------------------------------------------------------------------------------------------------------------------------------------------------------------------------------------------------------------------------------------------------------------------------------------------------------------------------------------------------------------------------------------------------------------------------------------------------------------------------------------------------------------------------------------------------------------------------------------------------------------------------------------------------------------------------------------------------------------------------------------------------------------------------------------------------------------------------------------------------------------------------------------------------------------------------------------------------------------------------------------------------------------------------------------------------------------------------------------------------------------------------------------------------------------------------------------------------------------------------------------------------------------------------------------------------------------------------------------------------------------------------------------------------------------------------------------------------|
|                                                                      |                                                                                        | <p>needed a specific goal to work towards, and a shorter time frame (e.g. one term rather than one school year) and tangible reward (named item, rather than an unspecified prize) would have helped to focus the children.</p> <p>Children were generally enthusiastic about collecting stickers. However difficulties experienced with receiving stickers from the majority of venues de-motivated them.</p> <p>Parents had found information on local sporting and leisure venues useful. The majority of parents were also in favour of incentive schemes to encourage children to undertake physical activities.</p> <p><i>“they [the children] were so eager to collect the stickers... especially at the beginning when we were having trouble with the stickers, when they [the leisure venues] weren’t giving them”</i> (deputy head teacher)</p>                                                                                                                                                                                                                                                                                                                                                                                                                                                                                                                                                                                                                     |
|                                                                      | Attendance at a course run by a Premier league football club                           | <p>This component was extremely popular both with children and school staff, with high (near 100%) attendance</p> <p>Most parents did not recall that their children attended the ‘Villa Vitality’ day</p> <p>Children attending Villa Vitality reported significantly greater levels of physical activity outside of school time 6-weeks post attendance, compared to control children.</p> <p><i>“they really enjoyed that [Villa Vitality], I think that was... you know, once they got into it and realised what it was about and that they got a lot out of it, then they really enjoyed it”</i> (deputy head teacher)</p>                                                                                                                                                                                                                                                                                                                                                                                                                                                                                                                                                                                                                                                                                                                                                                                                                                                |
| <b>Increasing skills of families through activity-based learning</b> | Cooking courses for family members                                                     | <p>Uptake was generally lower than capacity (4-10 participants / course). Uptake was highest in one school with an enthusiastic parent link worker.</p> <p>There was some drop out over the 5 weeks of the course but over 90% of participants attended 3 or more sessions.</p> <p>The courses were well received by those who attended. Compared to parents who did not participate, participants had lower baseline confidence in their cooking ability. Following the course, participants had higher levels of reported confidence than at baseline in shopping for healthy food and cooking healthy meals. They also reported that the family was eating more healthily.</p> <p>Courses where the children were also invited to cook with their parents were generally better attended. The model of parents learning about healthy cooking with their children was popular with parents, children and school staff.</p> <p>School staff thought it was feasible to use school time for healthy cooking sessions for children where parents could be invited along.</p> <p>Supporting information such as healthy eating tips and recipes in newsletters was well received by parents.</p> <p><i>“[cooking courses were] very, very successful, wonderful way of doing it. So the parents were learning about healthy ways of cooking and so on without it looking as if they were having a finger wagged at them”</i> (teacher and school-community liaison manager)</p> |
|                                                                      | Information on local leisure opportunities and week-end “taster” sessions for families | <p>Uptake of the taster activity sessions was generally poor, although it did increase through the year through recommendations by those who attended.</p> <p>Activities were very well received by those who did attend.</p> <p>School staff were supportive by the taster activity sessions and expressed surprise and disappointment by the low uptake rates.</p> <p>The taster sessions were extremely resource intensive to run, in terms of cost and staff time.</p> <p>Most parents (&gt;90%) found the information signposting healthy activities and venues useful, and school staff also felt this had been useful for</p>                                                                                                                                                                                                                                                                                                                                                                                                                                                                                                                                                                                                                                                                                                                                                                                                                                           |

1  
2  
3  
4  
5  
6  
7  
8  
9  
10  
11  
12  
13  
14  
15  
16  
17  
18  
19  
20  
21  
22  
23  
24  
25  
26  
27  
28  
29  
30  
31  
32  
33  
34  
35  
36  
37  
38  
39  
40  
41  
42  
43  
44  
45  
46  
47  
48  
49

---

|                                                                         |                                                                                                                                                                                                                                                                                                                                                                                                                                                                                                                          |
|-------------------------------------------------------------------------|--------------------------------------------------------------------------------------------------------------------------------------------------------------------------------------------------------------------------------------------------------------------------------------------------------------------------------------------------------------------------------------------------------------------------------------------------------------------------------------------------------------------------|
|                                                                         | parents and served to motivate them to try out local facilities.                                                                                                                                                                                                                                                                                                                                                                                                                                                         |
|                                                                         | <i>"I was so disappointed that out of 120 children, so few families took up these free visits when they were actually picked up and taken somewhere"</i><br>(deputy head teacher)                                                                                                                                                                                                                                                                                                                                        |
| Training walk<br>leaders to initiate<br>community walking<br>programmes | This component proved unfeasible, as there was a lack of volunteers to train as walk leaders. Even those who expressed an initial interest failed to attend the training. Despite repeated efforts to recruit community volunteers, only one person attended a training session, but they failed to organise any walking trips.<br><i>"we put signs up and sent leaflets out to see if anybody was interested in being a walk leader or training and I don't think we got anybody back at all"</i> (deputy head teacher) |

---



# BMJ Open

## Preventing childhood obesity, phase II feasibility study focusing on South Asians: BEACHes

|                                 |                                                                                                                                                                                                                                                                                                                                                                                                                                                                                                                                                                                                                                                                                                                                                                                                                                                                                                                                                  |
|---------------------------------|--------------------------------------------------------------------------------------------------------------------------------------------------------------------------------------------------------------------------------------------------------------------------------------------------------------------------------------------------------------------------------------------------------------------------------------------------------------------------------------------------------------------------------------------------------------------------------------------------------------------------------------------------------------------------------------------------------------------------------------------------------------------------------------------------------------------------------------------------------------------------------------------------------------------------------------------------|
| Journal:                        | <i>BMJ Open</i>                                                                                                                                                                                                                                                                                                                                                                                                                                                                                                                                                                                                                                                                                                                                                                                                                                                                                                                                  |
| Manuscript ID:                  | bmjopen-2013-004579.R1                                                                                                                                                                                                                                                                                                                                                                                                                                                                                                                                                                                                                                                                                                                                                                                                                                                                                                                           |
| Article Type:                   | Research                                                                                                                                                                                                                                                                                                                                                                                                                                                                                                                                                                                                                                                                                                                                                                                                                                                                                                                                         |
| Date Submitted by the Author:   | 12-Mar-2014                                                                                                                                                                                                                                                                                                                                                                                                                                                                                                                                                                                                                                                                                                                                                                                                                                                                                                                                      |
| Complete List of Authors:       | Adab, Peymane; The University of Birmingham, Public Health, Epidemiology & Biostatistics<br>Pallan, Miranda; University of Birmingham, Public Health, Epidemiology & Biostatistics<br>Cade, Janet; University of Leeds,<br>Ekelund, Ulf; MRC Epidemiology Unit,<br>Barrett, Timothy; Birmingham Childrens HospitalUniversity of Birmingham, Diabetes Unit Institute of Child Health<br>Daley, Amanda; University of Birmingham, Primary Care Clinical Sciences<br>Deeks, Jon; University of Birmingham, Public Health, Epidemiology & Biostatistics<br>Duda, Joan; University of Birmingham, Sport, Exercise & Rehabilitation Sciences<br>Gill, Paramjit; University of Birmingham, Primary Care Clinical Sciences<br>Parry, Jayne; University of Birmingham, Public Health, Epidemiology & Biostatistics<br>Bhopal, Raj; University of Edinburgh<br>Cheng, Kar Keung; The University of Birmingham, Public Health, Epidemiology & Biostatistics |
| <b>Primary Subject Heading</b>: | Public health                                                                                                                                                                                                                                                                                                                                                                                                                                                                                                                                                                                                                                                                                                                                                                                                                                                                                                                                    |
| Secondary Subject Heading:      | Public health                                                                                                                                                                                                                                                                                                                                                                                                                                                                                                                                                                                                                                                                                                                                                                                                                                                                                                                                    |
| Keywords:                       | Obesity, Children, Prevention                                                                                                                                                                                                                                                                                                                                                                                                                                                                                                                                                                                                                                                                                                                                                                                                                                                                                                                    |
|                                 |                                                                                                                                                                                                                                                                                                                                                                                                                                                                                                                                                                                                                                                                                                                                                                                                                                                                                                                                                  |

SCHOLARONE™  
Manuscripts

1  
2  
3 **Title: Preventing childhood obesity, phase II feasibility study focusing on South Asians:**  
4 **BEACHeS**

5  
6 **Authors:** Peymané Adab (MD)<sup>1</sup>, Miranda Pallan (PhD)<sup>1</sup>, Janet Cade (PhD)<sup>2</sup>, Ulf Ekelund  
7 (PhD)<sup>3</sup>, Timothy Barrett (PhD)<sup>4</sup>, Amanda Daley (PhD)<sup>1</sup>, Jonathan Deeks (PhD)<sup>1</sup>, Joan Duda  
8 (PhD)<sup>5</sup>, Paramjit Gill (DM)<sup>1</sup>, Jayne Parry (MD)<sup>1</sup>, Raj Bhopal (PhD)<sup>6</sup>, KK Cheng (PhD)<sup>1</sup>  
9

10  
11 **Affiliations:**

12 <sup>1</sup>School of Health & Population Sciences (Public Health, Epidemiology and Biostatistics and  
13 Primary Care Clinical Sciences), University of Birmingham

14 <sup>2</sup>Nutritional Epidemiology Group, School of Food Science and Nutrition, University of Leeds

15 <sup>3</sup>MRC Epidemiology Unit, Institute of Metabolic Science, Cambridge & Department of Sport  
16 Medicine, Norwegian School of Sport Sciences

17 <sup>4</sup>School of Clinical and Experimental Medicine, University of Birmingham

18 <sup>5</sup>Sport & Exercise Sciences, The University of Birmingham

19 <sup>6</sup>Edinburgh Ethnicity and Health Research Group, Centre for Population Health Sciences,  
20 University of Edinburgh  
21

22  
23 **Address correspondence to:**

24 Miranda J Pallan, Public Health, Epidemiology and Biostatistics, University of Birmingham,  
25 Edgbaston, Birmingham, B15 2TT, UK.

26 Tel: +441214147990

27 Fax: +441214147878

28 E-mail: m.j.pallan@bham.ac.uk  
29

30  
31 **Key words:** Childhood obesity prevention; feasibility study; MRC framework for complex  
32 interventions  
33

34 **Word count:**

35 Abstract: 273

36 Manuscript: 3743  
37  
38  
39  
40  
41  
42  
43  
44  
45  
46  
47  
48  
49  
50  
51  
52  
53  
54  
55  
56  
57  
58  
59  
60

## Abstract

**Objectives:** To assess feasibility and acceptability of a multifaceted, culturally appropriate intervention for preventing obesity in South Asian children, and to obtain data to inform sample size for a definitive trial.

**Design:** Phase II feasibility study of a complex intervention.

**Setting:** Eight primary schools in inner city Birmingham, UK, within populations that are predominantly South Asian.

**Participants:** 1090 children aged 6-8 years took part in the intervention. 571 (85.9% from South Asian background) underwent baseline measures. 85.5% (n=488) were followed up 2 years later.

**Interventions:** The one-year intervention consisted of school and family based activities, targeting dietary and physical activity behaviours. The intervention was modified and refined throughout the period of delivery.

**Main outcome measures:** Acceptability and feasibility of the intervention and of measurements required to assess outcomes in a definitive trial. The difference in BMI z-score between arms was used to inform sample size calculations for a definitive trial.

**Results:** Some intervention components (increasing school physical activity opportunities, family cooking skills workshops, signposting of local leisure facilities and attending day event at a football club) were feasible and acceptable. Other components were acceptable, but not feasible. Promoting walking groups was neither acceptable nor feasible. At follow up, children in the intervention compared with the control group were less likely to be obese (OR 0.41; 0.19 to 0.89), and had lower adjusted BMI z-score [-0.15 (-0.27, -0.03)].

**Conclusions:** The feasibility study informed components for an intervention programme. The favourable direction of outcome for weight status in the intervention group supports the need for a definitive trial. A cluster randomised controlled trial is now underway to assess the clinical and cost-effectiveness of the intervention.

## Article Summary

### *Strengths and limitations of the study*

- We report the findings of a feasibility study of a childhood obesity prevention intervention that focuses on primary school-aged children from South Asian communities in the UK. Despite their susceptibility to the cardiometabolic consequences of obesity, little obesity prevention research has been undertaken in these communities previously.
- The early phases of the UK Medical Research Framework for complex health interventions has guided the intervention development and evaluation process undertaken in this feasibility study.
- The feasibility and acceptability of the childhood obesity prevention intervention components was variable and context dependent, however, the exploratory nature of the study enabled us to modify and refine delivery of the intervention throughout.
- Development and evaluation of the feasibility and acceptability of the intervention was undertaken in materially disadvantaged, predominantly South Asian communities, thus its transferability would be dependent on tailoring to the specific local context.
- The final intervention programme, following modification and refinement in this feasibility study, is being definitively evaluated in an ongoing cluster-randomised controlled trial.

## Introduction

Childhood obesity is a growing problem worldwide.[1] Apart from psychological and social problems, longitudinal studies show adverse future health consequences in children as young as 7 years old who are obese.[2] In the UK, although childhood overweight prevalence has stabilised, socioeconomic disparities have widened, with increasing trend in more deprived sub-populations.[3] Data from the national childhood surveillance programmes in England show that at school entry (age 4-5 years), 9.5% of children are obese (i.e., above 95<sup>th</sup> percentile for national reference standards), but this prevalence doubles (19.2%) by the end of primary school (age 11).[4] The rate of increase among children from South Asian (SA) ethnic groups, especially girls, is greater than that for the population as a whole (increasing trend of 1.13% and 0.66% per year for Bangladeshi and Pakistani girls respectively, compared with 0.35% yearly increase in White British).[5] Thus the primary school period presents a key phase for prevention, and SA are an important target group.

However, despite numerous systematic reviews,[6,7] reports[8,9] and guidelines,[10] evidence for effective approaches to prevention is limited, particularly among minority ethnic groups. Relevant trials suggest that multifaceted school-based interventions have potential, particularly those that also include a home or community element, but the most effective combination of components is not clear.[7,9] The need for involving stakeholders, such as families, schools and local communities, in the decision making regarding potential intervention strategies has been highlighted.[6] Furthermore, for a complex intervention such as obesity prevention, which has several interconnecting components, a rigorous and iterative phased approach is required to improve study design, execution and applicability of results. The UK Medical Research Council (MRC) proposed a framework for such interventions.[11] Given the growing problem of obesity and lack of clarity on effective approaches to

1  
2  
3 prevention, it would be unwise to embark on another trial without thorough attention to the  
4  
5 early phases described in the MRC framework.  
6  
7

8 The Birmingham healthy Eating and Active lifestyle for CHildren Study (BEACHeS  
9  
10 [http://www.birmingham.ac.uk/research/activity/mds/projects/HaPS/PHEB/WAVES/BEACH](http://www.birmingham.ac.uk/research/activity/mds/projects/HaPS/PHEB/WAVES/BEACHeS/index.aspx)  
11 [eS/index.aspx](http://www.birmingham.ac.uk/research/activity/mds/projects/HaPS/PHEB/WAVES/BEACHeS/index.aspx)), used the theoretical and modelling phases of the MRC framework to develop  
12  
13 a multifaceted childhood obesity prevention programme, targeting SA children (phase I).[12]  
14  
15 Here we report on the feasibility study (phase II). The aim was to assess feasibility and  
16  
17 acceptability of the intervention. In addition we wanted to obtain data to inform a definitive  
18  
19 (phase III) cluster-randomised controlled trial (RCT).  
20  
21  
22  
23  
24  
25  
26  
27  
28  
29  
30  
31  
32  
33  
34  
35  
36  
37  
38  
39  
40  
41  
42  
43  
44  
45  
46  
47  
48  
49  
50  
51  
52  
53  
54  
55  
56  
57  
58  
59  
60

## Materials and Methods

The feasibility study was conducted in eight Birmingham primary schools from 2006 to 2009. Children underwent baseline measures between December 2006 and June 2007. Four schools were selected to receive the intervention (2007/8 academic year), and the remainder had no active intervention. Follow up data were collected two years after baseline.

### *Setting*

Birmingham is UK's second city with a high minority ethnic population (34%), one fifth being from the three main SA communities (Pakistani, Bangladeshi and Indian). We obtained a list of all Local Authority-maintained primary schools in Birmingham. Of 304 schools, 52 had  $\geq 50\%$  of pupils from SA background (mean 75%). These, compared with the remainder, had a higher proportion of children eligible for free school meals (FSM), indicating higher deprivation. Schools were ranked in order of FSM eligibility, and those from either extreme were successively invited until 8 agreed to take part.

### *Participants*

Pupils from years 1 and 2 (aged 5-7 years) were invited to participate. Parents of the children were approached by letter distributed through the schools, and active opt-in consent was sought for their child to participate in measurements.

### *Baseline and follow up measures*

Age, sex and ethnicity data (from parent report at school entry) were obtained from school records on all eligible children in participating schools. Children with consent also underwent a range of anthropometric measurements, including standing height (measured to nearest 0.1cm with a Leicester Height Measure), weight (measured to nearest 0.1 kg with aTanita bioimpedance monitor), two measures of waist circumference (measured to nearest 0.5cm),

1  
2  
3 and skinfold thickness at five sites (biceps, triceps, subscapular, suprailiac and thigh;  
4  
5 measured using a Holtain calliper). Children also completed interviewer administered  
6  
7 questionnaires (not discussed in this paper, but including: quality of life (PedsQL),[13] self  
8  
9 concept (Marsh self-description questionnaire),[14] perceived physical competence (Harter  
10  
11 Pictorial Scale for Young Children),[15] and body image perception (adapted Collin's  
12  
13 Pictorial Image Scale)[16]). All measures were undertaken by trained researchers using  
14  
15 standard protocols.

16  
17  
18 Dietary intake was assessed using the Child And Dietary Evaluation Tool (CADET)[17]; a  
19  
20 24-hour food tick list that has been validated against a semi-weighed diary in children aged 3-  
21  
22 7 years. A researcher completed the CADET for children during school hours, and parents  
23  
24 were given instructions for completing it for the remainder of the 24 hour period. Physical  
25  
26 activity levels were assessed using the Actiheart monitor (CamnTech, Papworth UK) worn  
27  
28 for five consecutive days, including a weekend. This is validated for use in children<sup>18</sup> and  
29  
30 was set up to measure acceleration and heart rate at 30 second epochs. In addition, parents  
31  
32 were asked to complete questionnaires which included questions on family composition, and  
33  
34 family dietary and physical activity habits.  
35  
36  
37  
38

### 39 ***Intervention***

40  
41  
42 The process for intervention development has been reported elsewhere,[12] but in brief, the  
43  
44 multicomponent intervention was developed by combining evidence from the literature with  
45  
46 views from key stakeholders drawn from SA communities (including parents, teachers,  
47  
48 school nurses, dieticians, community leaders, school governors, and retail and leisure  
49  
50 representatives close to schools) and a multi-disciplinary group of relevant professionals.  
51  
52 Important contextual data were gained from stakeholders, which was critical for informing  
53  
54 intervention development and highlighted potential barriers (e.g. cultural unacceptability of  
55  
56 certain types of physical activity for girls), as well as opportunities for intervention (e.g.  
57  
58  
59  
60



1  
2  
3 schools being considered a natural environment for providing skills to families), in relation to  
4  
5 SA communities.[18,19] A review of local facilities, resources and opportunities related to  
6  
7 healthy eating and the promotion of physical activity targeting children was used to inform  
8  
9 the design and encourage longer term sustainability of the intervention. We also took  
10  
11 account of national childhood obesity prevention policy during the development process to  
12  
13 try and ensure that the intervention had an impact that was additional to existing national  
14  
15 initiatives. The intervention targeted both diet and physical activity behaviours and consisted  
16  
17 of two main strands: i) increasing children's physical activity levels and promoting healthy  
18  
19 eating through schools, and ii) increasing skills among family members through family  
20  
21 educational activities. A number of intervention techniques (as defined in the CALO-RE  
22  
23 Taxonomy of behaviour changed techniques for physical activity and healthy eating[20])  
24  
25 were utilised to deliver each intervention component. A more detailed description of the  
26  
27 intervention is provided in Table 1.  
28  
29  
30  
31  
32  
33  
34  
35  
36  
37  
38  
39  
40  
41  
42  
43  
44  
45  
46  
47  
48  
49  
50  
51  
52  
53  
54  
55  
56  
57  
58  
59  
60

**Table 1: Intervention components and techniques<sup>20</sup> included in the BEACHeS intervention programme and findings from the process evaluation**

| Intervention component                                        | Aim                                                                                                          | Intervention techniques                                                                                      | Description                                                                                                                                                                                                                                                                                                                                                                                 | Agent responsible for delivery                                                                                                                                                                                                                            | Evaluation method                                                                                                                                                                                                            | Evaluation findings                                                                                                                                                                                                                                                                                                                                                                                                      |
|---------------------------------------------------------------|--------------------------------------------------------------------------------------------------------------|--------------------------------------------------------------------------------------------------------------|---------------------------------------------------------------------------------------------------------------------------------------------------------------------------------------------------------------------------------------------------------------------------------------------------------------------------------------------------------------------------------------------|-----------------------------------------------------------------------------------------------------------------------------------------------------------------------------------------------------------------------------------------------------------|------------------------------------------------------------------------------------------------------------------------------------------------------------------------------------------------------------------------------|--------------------------------------------------------------------------------------------------------------------------------------------------------------------------------------------------------------------------------------------------------------------------------------------------------------------------------------------------------------------------------------------------------------------------|
| <b>School based activities</b>                                |                                                                                                              |                                                                                                              |                                                                                                                                                                                                                                                                                                                                                                                             |                                                                                                                                                                                                                                                           |                                                                                                                                                                                                                              |                                                                                                                                                                                                                                                                                                                                                                                                                          |
| Physical activities within school day                         | To increase the amount of time that children are physically active within the school day                     | Environmental restructuring<br>Prompt practice                                                               | Three elements introduced into schools:<br>1. 'Wake Up Shake Up': a short (10 minutes) organised daily dance or exercise routine to music<br>2. Organised playground activities at lunch and break times through the training of school staff to act as "play leaders"<br>3. 'Take 10': teaching resource which links 10 minutes physical activity in the classroom to curricular subjects. | Trained school staff (including teachers, teaching assistants or lunch time assistants). The decision of which staff members to train for this component took into account individual school circumstances and was made in consultation with each school. | <ul style="list-style-type: none"> <li>• Interviews with school staff</li> <li>• Observation of sessions in schools</li> <li>• Self-completion questionnaires administered to children and parents</li> </ul>                | Overall, school staff with a responsibility for health were enthusiastic and committed to introducing these schemes, and all schemes were acceptable to children. Individual school and staff factors strongly influence the success of each element in the different schools. Parents, in general felt that the amount of physical activity their children were undertaking in school had increased over the last year. |
| Incentive scheme to encourage physical activity out of school | To increase the amount of time outside of school hours that children spend doing leisure physical activities | Prompt self monitoring of behaviour<br>Prompt practice<br>Provide rewards contingent on successful behaviour | Children received a sticker collection card from school and information on local participating sports and leisure venues. Each time a child attended a venue, they collected a sticker. The child with the most stickers in each school received a prize.                                                                                                                                   | Sticker collection card delivered through school class teacher. Stickers handed out by staff at leisure venues.                                                                                                                                           | <ul style="list-style-type: none"> <li>• Interviews with school staff</li> <li>• Telephone survey of leisure venue staff</li> <li>• Assessment of returned collection cards</li> <li>• Questionnaires to children</li> </ul> | Although this type of incentive scheme appears acceptable to children, parents and school staff alike, it was not feasible in terms of maintaining cooperation of participating venues. An element that was well received and could be retained, is the signposting information given to children and families.                                                                                                          |
| Attendance at a course run by a Premier league                | To encourage physical activity and healthy eating through                                                    | Provide information on consequences of behaviour<br>Model/demonstrate                                        | School classes attend a 'Villa Vitality' day. Half the day is spent with Football Club coaches, exercising and learning football                                                                                                                                                                                                                                                            | Aston Villa Football Club Community programme staff deliver on day of visit to club.                                                                                                                                                                      | <ul style="list-style-type: none"> <li>• Interviews with school staff</li> <li>• Self-completion questionnaires to parents</li> </ul>                                                                                        | This was highly acceptable to children and school staff and is feasible to deliver to the target age group. There is some evidence that it may favourably alter children's health-                                                                                                                                                                                                                                       |

|                                                             |               |                                |                                                                                               |                                                                                                                                                                                                                                             |                                                                  |                                                                                                               |             |
|-------------------------------------------------------------|---------------|--------------------------------|-----------------------------------------------------------------------------------------------|---------------------------------------------------------------------------------------------------------------------------------------------------------------------------------------------------------------------------------------------|------------------------------------------------------------------|---------------------------------------------------------------------------------------------------------------|-------------|
| 1<br>2<br>3<br>4<br>5<br>6<br>7<br>8<br>9<br>10<br>11<br>12 | football club | an iconic sporting institution | behaviour<br><br>Prompt identification of role model/advocate<br><br>Goal setting (behaviour) | skills, and the other half of the day is an interactive learning session on healthy eating and healthy lifestyles. Teachers provided with material to deliver over 6 weeks to reinforce messages, and encourage weekly challenges or goals. | School class teachers deliver 6 weekly lessons after club visit. | •Pre- and 6-week post intervention questionnaires (knowledge, attitudes & behaviour) administered to children | behaviours. |
|-------------------------------------------------------------|---------------|--------------------------------|-----------------------------------------------------------------------------------------------|---------------------------------------------------------------------------------------------------------------------------------------------------------------------------------------------------------------------------------------------|------------------------------------------------------------------|---------------------------------------------------------------------------------------------------------------|-------------|

### Increasing skills of families through activity-based learning

|                                                                                  |                                                                               |                                                                                                                            |                                                                                                                                                                                                     |                                                                                                                                                                                                                                                                                                                                  |                                                                                                                                                                                              |                                                                                                                                                                                          |                                                                                                                                                                                                                                                                                                                             |
|----------------------------------------------------------------------------------|-------------------------------------------------------------------------------|----------------------------------------------------------------------------------------------------------------------------|-----------------------------------------------------------------------------------------------------------------------------------------------------------------------------------------------------|----------------------------------------------------------------------------------------------------------------------------------------------------------------------------------------------------------------------------------------------------------------------------------------------------------------------------------|----------------------------------------------------------------------------------------------------------------------------------------------------------------------------------------------|------------------------------------------------------------------------------------------------------------------------------------------------------------------------------------------|-----------------------------------------------------------------------------------------------------------------------------------------------------------------------------------------------------------------------------------------------------------------------------------------------------------------------------|
| 13<br>14<br>15<br>16<br>17<br>18<br>19<br>20<br>21<br>22<br>23<br>24<br>25<br>26 | Cooking courses for family members                                            | To increase healthy cooking skills and confidence and influence dietary behaviour                                          | Provide information on consequences of behaviour in general<br><br>Model/demonstrate behaviour<br><br>Provide instruction on how to perform the behaviour<br><br>Prompt generalisation of behaviour | Five week courses on healthy cooking were delivered through schools to parents or other family members, some courses include children. Courses ran successively to allow all parents to attend if they wanted. Healthy recipes were distributed to support the course content.                                                   | Birmingham Community NHS Trust dietetics staff.                                                                                                                                              | <ul style="list-style-type: none"> <li>•Interviews with school staff</li> <li>•Uptake rates for courses</li> <li>•Participant pre and post-course questionnaires</li> </ul>              | This component was popular with those who participated and there was some evidence that it influenced confidence and cooking practices. Running sessions for parents and children was the most popular model, and having the sessions based in school time for children and inviting parents to attend improved attendance. |
| 27<br>28<br>29<br>30<br>31<br>32<br>33<br>34<br>35<br>36<br>37<br>38             | Information on local leisure opportunities and “taster” sessions for families | To equip families with the knowledge and skills to undertake physical activities with their children in their leisure time | Provide information on when and where to perform behaviour<br><br>Model/demonstrate behaviour                                                                                                       | Parents were given information on local sporting and leisure venues and events. They were invited to attend weekend taster sessions with their children, through school. Activities range from cricket and football, to archery, climbing and dry-slope skiing. There was no cost for the activities and transport was provided. | BEACHEs research staff compiled list of venues and prepared signposting sheets. BEACHEs research staff accompanied families to leisure venues, where leisure venue staff delivered sessions. | <ul style="list-style-type: none"> <li>•Interviews with school staff</li> <li>•Uptake of the taster sessions</li> <li>•Self-completion questionnaires to parents and children</li> </ul> | This component was resource intensive to deliver, and uptake was very low. However, the signposting information was used by families, and was appreciated.                                                                                                                                                                  |

1  
2  
3  
4  
5  
6  
7  
8  
9  
10  
11  
12  
13  
14  
15  
16  
17  
18  
19  
20  
21  
22  
23  
24  
25  
26  
27  
28  
29  
30  
31  
32  
33  
34  
35  
36  
37  
38  
39  
40  
41  
42  
43  
44  
45  
46  
47  
48  
49

---

|                                                                |                                                                                             |                                                    |                                                                                                                                                                                    |                                                                                 |                                                                                                                                                                    |                                                                                                                                                                                                                                                                                              |
|----------------------------------------------------------------|---------------------------------------------------------------------------------------------|----------------------------------------------------|------------------------------------------------------------------------------------------------------------------------------------------------------------------------------------|---------------------------------------------------------------------------------|--------------------------------------------------------------------------------------------------------------------------------------------------------------------|----------------------------------------------------------------------------------------------------------------------------------------------------------------------------------------------------------------------------------------------------------------------------------------------|
| Training walk leaders to initiate community walking programmes | To increase walking by families and other community members through organised leisure walks | Model/demonstrate behaviour<br><br>Prompt practice | Community volunteers were recruited through schools to become trained walk leaders. Training was provided to equip volunteers to organise and lead walks in their local community. | Walk-leader training programme delivered through Heart of Birmingham NHS Trust. | <ul style="list-style-type: none"> <li>•Assessment of numbers attending training to be walk leaders</li> <li>•Monitoring numbers joining walking groups</li> </ul> | This component proved unfeasible, as there was a lack of volunteers. Even those who expressed an initial interest failed to attend the training. Despite repeated efforts to recruit community volunteers, no one attended the training in any of the four BEACHeS intervention communities. |
|----------------------------------------------------------------|---------------------------------------------------------------------------------------------|----------------------------------------------------|------------------------------------------------------------------------------------------------------------------------------------------------------------------------------------|---------------------------------------------------------------------------------|--------------------------------------------------------------------------------------------------------------------------------------------------------------------|----------------------------------------------------------------------------------------------------------------------------------------------------------------------------------------------------------------------------------------------------------------------------------------------|

---

For peer review only

### *Allocation of intervention*

This was a non-randomised feasibility trial. After baseline measurements were completed, schools were allocated to intervention or control arms. We matched schools by size, and proportion of children eligible for FSM. We then took the geographical location of the schools into account and allocated the matched pairs to either the intervention or control arm so that we minimised the chance of contamination between the two arms.

### *Process measures*

The main aim of the study was to assess intervention feasibility and acceptability. Each component was evaluated separately, using a variety of methods. These included collection of uptake data, direct observation, questionnaires to children and parents and interviews with key school staff. The questionnaires were also used to evaluate overall perceptions of the intervention and engagement with different intervention components. Topics covered in the semi-structured interviews included exploration of how the different intervention components were implemented, which elements were perceived to work well and ideas for further development. The interviews were tape-recorded, transcribed and analysed thematically.

### *Other measures and analysis*

We assessed the feasibility of obtaining outcome data, primarily body mass index (BMI), but also diet and physical activity and other anthropometric measures as described above.

Exploratory comparison between intervention and control children was also undertaken to determine effect size.

Height and weight data were used to calculate BMI ( $\text{kg/m}^2$ ) and converted into standard deviation scores (BMI z-score) using the UK 1990 growth reference charts.[21] Children were categorised as underweight, healthy weight, overweight or obese using the 2<sup>nd</sup>, 85<sup>th</sup> and 95<sup>th</sup> centile cut-offs. For waist circumference and skinfolds, the mean was used for analyses.

1  
2  
3 Skinfold measures were combined to obtain sum, upper (biceps, triceps and subscapular) and  
4  
5 lower (suprailiac and thigh) skinfolds.  
6

7  
8 Data from the CADET were coded and analysed by a food diary analysis program (DANTE,  
9  
10 University of Leeds) to estimate total energy intake (KJ) and amount of fruit and vegetables,  
11  
12 and sugar consumed. Data on foods consumed in school and at home were analysed  
13  
14 separately, then combined to obtain estimates for the complete 24 hour measurement period.  
15

16  
17 Accelerometry data were used to assess physical activity levels ([http://www.mrc-epid.cam.ac.uk/Research/Programmes/Programme\\_5/InDepth/Programme%205\\_Downloads.html](http://www.mrc-epid.cam.ac.uk/Research/Programmes/Programme_5/InDepth/Programme%205_Downloads.html)).  
18  
19 Total daily volume of physical activity was estimated and expressed as average counts  
20  
21 per minute (cpm). The mean duration of daily moderate to vigorous physical activity  
22  
23 (MVPA, min/day) was calculated (400 cpm cut-off for lower threshold).[22] The proportion  
24  
25 participating in  $\geq 60$  minutes MVPA (as recommended by international guidelines) was also  
26  
27 calculated.  
28  
29  
30  
31

32  
33 Statistical analyses were undertaken using STATA (v11). The intraclass correlation  
34  
35 coefficient (ICC) for the main outcome (BMI z-score) was calculated, but because of the  
36  
37 small number of schools, clustering was not taken into account for the analysis. We analysed  
38  
39 final BMI, diet and physical activity levels of children in the intervention, compared with  
40  
41 those in the control group. To adjust for baseline differences, we initially developed multiple  
42  
43 linear regression models, which included the relevant baseline values of BMI, dietary factors  
44  
45 or physical activity measures as covariates. Further models were then developed which also  
46  
47 included potential confounders as covariates (age, sex, ethnicity). Logistic regression was  
48  
49 used to assess risk of obesity (compared with all non-obese children), and likelihood of  
50  
51 meeting  $\geq 60$  minutes MVPA at follow up in the intervention, compared with control children.  
52  
53  
54

### 55 56 *Ethical approval* 57 58 59 60

1  
2  
3 Ethical approval was granted by The Black Country Research Ethics Committee  
4  
5 (08/H1202/22). Approval was sought for active consent from parents for the child  
6  
7 measurements, whilst consent for participation in the intervention was at school level.  
8  
9  
10  
11  
12  
13  
14  
15  
16  
17  
18  
19  
20  
21  
22  
23  
24  
25  
26  
27  
28  
29  
30  
31  
32  
33  
34  
35  
36  
37  
38  
39  
40  
41  
42  
43  
44  
45  
46  
47  
48  
49  
50  
51  
52  
53  
54  
55  
56  
57  
58  
59  
60

## Results

### *Feasibility and acceptability of intervention components*

Some intervention components (particularly those delivered through school) were more successfully delivered than others. Intervention was modified during the course of delivery to optimise participation and in response to feedback. The findings are summarised in Table 1, and details are reported in the appendix.

Two intervention components were found to be unsuitable to include within an intervention programme in the format delivered. First was the scheme to incentivise out of school leisure activities. Poor co-operation from leisure venues and lack of resources to continually remind and motivate children contributed to the failure of this component. Second was the training of walk leaders. Despite effort to recruit through school staff, influential parents and various forms of publicity, volunteers were not forthcoming. The only person who underwent training did not undertake any walking groups.

One component was partially successful. Signposting of leisure facilities in the local area was popular among parents and school staff. However, attendance at organised taster sessions was poor, which was outweighed by the high staff and monetary resources required to deliver the component. The taster sessions were therefore not feasible to include in a larger trial.

The other intervention components had varying degrees of success, and the process evaluation highlighted how delivery could be improved. Individual school characteristics and differences between staff members strongly influenced the success of each element in the different schools.



### *Acceptability of allocation to control*

Acceptability of non-intervention was assessed through interviews with control school staff. All understood the need for a control arm. One would have liked alternative support to compensate for not being offered the intervention. In other control schools, staff expressed that being part of the study had benefitted them in other ways, and contributed to the school's status as a 'healthy school'.

### *Outcomes*

#### *Feasibility of outcome measures*

There were 1090 eligible children in the eight participating schools (range 54-180). Of these, 606 (55.6%) had parental consent and anthropometric measures were completed on those in school on measurement days (n=571, 94.2% of consented). Useable data ( $\geq 3$  days) for Actiheart were available for 508 (89.0%). Completion of CADET was more variable. Although 445 (77.9%) were returned at baseline, 269 (47.1%) were complete, of which two thirds (n=174) had usable data. Two years after the baseline measures, 488 children (85.5%) were successfully followed up. The proportion with usable Actiheart data was similar to baseline. However a higher proportion (n=454, 93%) had a completed CADET, although only 163 (36%) had usable home data.

#### *Findings from the feasibility study*

A total of 574 children were included in the trial (Figure 1), of whom 85.9% were SA. Baseline characteristics are summarised in Table 2 (anthropometric measures were completed for 571 of the 574 participating children). The age, sex and ethnicity of those who took part were similar in distribution to the characteristics of the non-consented eligible children.

1  
2  
3 Over 90% in both arms were from the most deprived areas, in keeping with the location and  
4  
5 ethnic composition of the population. Around one in five (n=115) were overweight or obese.  
6  
7 This proportion was slightly higher in the control (21.7%) compared to the intervention  
8  
9 (18.3%) schools. A similar pattern was seen for other measures of body fat (skinfold  
10  
11 measures, bioimpedance), but not for waist circumference which was similar in intervention  
12  
13 and control groups. Under half of the children (47.9%) undertook  $\geq 60$  minutes of MVPA.  
14  
15 Levels of physical activity (total cpm) and duration of time spent in MVPA were slightly  
16  
17 higher among children from control, compared with intervention schools. Total dietary  
18  
19 energy, fruit and vegetable and sugar intake were slightly higher among children in  
20  
21 intervention, compared with control schools.  
22  
23  
24

25  
26 Two-years post baseline, 254 (83.3%) children in the control and 234 (86.2%) in the  
27  
28 intervention schools were successfully followed up. There was no significant difference in  
29  
30 baseline weight status, MVPA, diet or sex, between those followed up, and those lost to  
31  
32 follow up (data not shown). However, SA children were less likely to be lost to follow up  
33  
34 (n=58; 11.9%) compared with those from other ethnic groups (n=28; 34.6%).  
35  
36  
37  
38  
39  
40  
41  
42  
43  
44  
45  
46  
47  
48  
49  
50  
51  
52  
53  
54  
55  
56  
57  
58  
59  
60

**Table 2: Baseline characteristics of children measured for the BEACHes feasibility study**

| Characteristic/Measure*             | Intervention group: N=269<br>n (%) or mean (SD) | Control group: N=305<br>n (%) or mean (SD) |
|-------------------------------------|-------------------------------------------------|--------------------------------------------|
| Sex (n=574)                         |                                                 |                                            |
| Male                                | 144 (53.5)                                      | 142 (49.8)                                 |
| Female                              | 125 (46.5)                                      | 153 (50.2)                                 |
| Age in years (n=574)                | 6.53 (0.59)                                     | 6.44 (0.58)                                |
| Ethnicity (n=574)                   |                                                 |                                            |
| Bangladeshi                         | 36 (13.4)                                       | 46 (15.1)                                  |
| Indian                              | 22 (8.2)                                        | 5 (1.6)                                    |
| Pakistani                           | 181 (67.3)                                      | 203 (66.6)                                 |
| Other                               | 30 (11.2)                                       | 51 (16.7)                                  |
| Townsend score decile (n=572)       |                                                 |                                            |
| 1 (most deprived)                   | 250 (93.3)                                      | 285 (93.8)                                 |
| 2                                   | 6 (2.2)                                         | 9 (3.0)                                    |
| 3                                   | 8 (3.0)                                         | 5 (1.6)                                    |
| 4-7                                 | 4 (1.5)                                         | 5 (1.6)                                    |
| BMI-SDS score (n=571)               | -0.03 (1.37)                                    | 0.08 (1.39)                                |
| Weight status (n=571)               |                                                 |                                            |
| Underweight                         | 6 (2.3)                                         | 10 (3.3)                                   |
| Healthy weight                      | 212 (79.4)                                      | 228 (75.0)                                 |
| Overweight                          | 15 (5.6)                                        | 27 (8.9)                                   |
| Obese                               | 34 (12.7)                                       | 39 (12.8)                                  |
| Waist circumference in cm (n=569)   | 55.6 (7.7)                                      | 55.3 (6.9)                                 |
| Skinfold measures in mm             |                                                 |                                            |
| Biceps (n=563)                      | 7.5 (3.6)                                       | 8.0 (4.0)                                  |
| Triceps (n=563)                     | 10.9 (4.1)                                      | 11.6 (4.5)                                 |
| Subscapular (n=559)                 | 7.5 (4.4)                                       | 7.9 (5.0)                                  |
| Suprailiac (n=561)                  | 7.0 (4.4)                                       | 7.4 (4.7)                                  |
| Sum of 4 skinfolds (n=556)          | 32.5 (14.7)                                     | 34.8 (16.8)                                |
| Thigh (n=433)                       | 14.4 (5.5)                                      | 15.7 (6.3)                                 |
| Sum of upper skinfolds (n=557)      | 25.7 (10.9)                                     | 27.5 (12.5)                                |
| Sum of lower skinfolds (n=433)      | 21.0 (8.8)                                      | 22.9 (10.1)                                |
| Bioimpedance ( $\Omega$ ) (n=521)   | 692.6 (72.5)                                    | 695.1 (80.8)                               |
| Physical activity (n=535)           |                                                 |                                            |
| Counts/min                          | 79.9 (23.4)                                     | 83.4 (27.3)                                |
| MVPA min/24h                        | 52.8 (28.4)                                     | 62.9 (25.0)                                |
| $\geq 60$ mins MVPA per day (n=535) | 100 (40.2)                                      | 156 (54.5)                                 |
| 1 day school dietary intake (n=441) |                                                 |                                            |
| Mean energy (KJ)                    | 2378.2 (1619.2)                                 | 1917.1 (1821.7)                            |
| Fruit and vegetables (grams)        | 140.6 (121.4)                                   | 105.8 (118.7)                              |
| Sugar (grams)                       | 41.0 (60.9)                                     | 35.3 (62.9)                                |
| 1 day home dietary intake (n=174)   |                                                 |                                            |
| Mean energy (KJ)                    | 7021.3 (3181.1)                                 | 6058.34 (3138.2)                           |
| Fruit and vegetables (grams)        | 329.85 (232.2)                                  | 267.95 (193.3)                             |
| Sugar (grams)                       | 105.36 (50.2)                                   | 93.50 (36.6)                               |
| 24h dietary intake (n=173)          |                                                 |                                            |
| Total energy (KJ)                   | 9326.6 (3083.7)                                 | 8397.3 (4035.5)                            |
| Fruit and vegetables (grams)        | 475.6 (261.4)                                   | 368.7 (220.2)                              |
| Sugar (grams)                       | 154.1 (108.7)                                   | 129.7 (85.8)                               |

\*n in this column indicates how many children had useable data for each characteristic/measure

### ***Estimation of effect size to inform definitive trial***

Anthropometric, physical activity and dietary measures in intervention and control groups at follow up are shown in Table 3. The proportion of children who were overweight or obese had increased in all schools from baseline to follow up (from 7.3% to 9.9%, and from 12.8% to 19.1% for overweight and obese respectively). The risk of obesity was significantly lower in the intervention compared with the control group (OR 0.41; 0.19 to 0.89). The increase in BMI z-score was also significantly lower in the intervention compared with control, after adjustment [-0.15kg/m<sup>2</sup> (-0.27, -0.03)] (Table 4). A similar trend was seen for all other anthropometric measures, although none were statistically significant.

The ICC for the outcome “overweight/obese” compared to non-overweight, was 0.00 (95% CI (0, 0.02)), whilst for BMI z-score, the ICC was 0.01 (95% CI (0, 0.04)). Therefore, taking account of clustering in the analysis would make marginal difference to the findings.

The proportion of children who undertook ≥60 minutes MVPA reduced (from 48.8% to 27.1%) at follow up, with the reduction being greater among control (30.2%) compared with intervention (23.8%) children. The differences in physical activity levels at follow up were not significant between groups (Table 4).

Total energy intake had increased slightly at follow up (7473 KJ at baseline to 8130 KJ at follow up). There were no significant differences in dietary intake between control and intervention children, although 24 hour dietary intake data were only available for 163 (33%) children at follow up, and only 61 children had dietary data at both baseline and follow up. However, school dietary intake data were more complete (93% with follow up data and 73% with both baseline and follow up data), and children in intervention schools had significantly more fruits and vegetables and lower sugar intake, compared with those in control schools (Table 4).

1  
2  
3 As the intervention was designed to be particularly relevant to SA children, we repeated the  
4  
5 multivariate analyses including only children of SA ethnicity. The mean differences and odd  
6  
7 ratios for the outcomes were of a similar magnitude to the main analyses (results not shown).  
8  
9  
10  
11  
12  
13  
14  
15  
16  
17  
18  
19  
20  
21  
22  
23  
24  
25  
26  
27  
28  
29  
30  
31  
32  
33  
34  
35  
36  
37  
38  
39  
40  
41  
42  
43  
44  
45  
46  
47  
48  
49  
50  
51  
52  
53  
54  
55  
56  
57  
58  
59  
60

**Table 3: Anthropometric, diet and physical activity measures in intervention and control groups at follow up**

| Measure*                            | Intervention group (N=234)<br>n (%) or mean (SD) | Control group (N=254)<br>n (%) or mean (SD) |
|-------------------------------------|--------------------------------------------------|---------------------------------------------|
| <b>Anthropometric measures</b>      |                                                  |                                             |
| BMI z-score (n=488)                 | 0.13 (1.5)                                       | 0.40 (1.5)                                  |
| Weight status (n=488)               |                                                  |                                             |
| Underweight                         | 11 (4.7)                                         | 8 (3.2)                                     |
| Healthy weight                      | 160 (68.4)                                       | 168 (66.1)                                  |
| Overweight                          | 27 (11.5)                                        | 21 (8.3)                                    |
| Obese                               | 36 (15.4)                                        | 57 (22.4)                                   |
| Waist circumference (cm)<br>(n=472) | 59.4 (9.5)                                       | 60.4 (9.1)                                  |
| <b>Skinfold measures (mm)</b>       |                                                  |                                             |
| Biceps (n=486)                      | 6.9(3.5)                                         | 7.7 (3.8)                                   |
| Triceps (n=485)                     | 11.2 (4.8)                                       | 11.9 (4.6)                                  |
| Subscapular (n=479)                 | 8.5 (5.3)                                        | 9.3 (5.8)                                   |
| Suprailiac (n=475)                  | 8.8 (5.9)                                        | 9.4 (5.9)                                   |
| Sum of 4 skinfolds (n=471)          | 35.2 (18.1)                                      | 37.6 (18.4)                                 |
| Thigh (n=404)                       | 17.3 (7.5)                                       | 18.9 (8.1)                                  |
| Sum of upper skinfolds (n=479)      | 26.5 (12.7)                                      | 28.7 (13.1)                                 |
| Sum of lower skinfolds (n=402)      | 25.3(11.8)                                       | 27.6 (13.1)                                 |
| Bioimpedance ( $\Omega$ ) (n=453)   | 692.0 (83.1)                                     | 688.3 (81.3)                                |
| <b>Physical Activity (n=467)</b>    |                                                  |                                             |
| Counts/min                          | 68.7 (33.4)                                      | 71.0 (22.9)                                 |
| MVPA min/24h                        | 49.1 (21.8)                                      | 51.1 (20.2)                                 |
| Achieving $\geq$ 60 mins MVPA       | 53 (23.6)                                        | 73 (30.2)                                   |
| <b>Dietary intake</b>               |                                                  |                                             |
| <b>School (n=454)</b>               |                                                  |                                             |
| Energy (KJ)                         | 1908.7 (831.8) <sup>S</sup>                      | 2045.1 (777.9)                              |
| Fruit and vegetables (grams)        | 143.1 (135.0)                                    | 93.9 (94.0)                                 |
| Sugar (grams)                       | 25.0 (15.7)                                      | 29.8 (16.7)                                 |
| <b>Home (n=163)</b>                 |                                                  |                                             |
| Energy (KJ)                         | 7860.5 (4366.4)                                  | 8145.4 (4004.5)                             |
| Fruit & vegetables (grams)          | 367.5 (316.6)                                    | 342.0 (224.9)                               |
| Sugar (grams)                       | 113.8 (63.7)                                     | 121.0 (56.8)                                |
| <b>24h dietary intake (n=163)</b>   |                                                  |                                             |
| Energy (KJ)                         | 9527.8 (4400.3)                                  | 9820.7 (3773.1)                             |
| Fruit & vegetables (grams)          | 519.1 (350.2)                                    | 446.0 (238.5)                               |
| Sugar (grams)                       | 137.2 (64.2)                                     | 150.5 (59.9)                                |

\*n in this column indicates how many children had useable data for each measure

**Table 4: Adjusted differences in anthropometric, diet and physical activity measures between control and intervention groups**

| Outcome variable*                     | Intervention vs. Control (adjusted for baseline) | p value | Intervention vs. Control (finally adjusted)† | p value |
|---------------------------------------|--------------------------------------------------|---------|----------------------------------------------|---------|
|                                       | <b>OR (95% CI)</b>                               |         | <b>Adjusted†OR (95% CI)</b>                  |         |
| Obese (n=486)                         | 0.36 (0.17, 0.77)                                | 0.01    | 0.41 (0.19, 0.89)                            | 0.02    |
| Achieving ≥60 mins MVPA (n=441)       | 0.82 (0.52, 1.28)                                | 0.38    | 0.74 (0.45, 1.20)                            | 0.22    |
|                                       | <b>Mean difference (95%CI)</b>                   |         | <b>Adjusted† mean difference (95%CI)</b>     |         |
| BMI z-score (n=486)                   | -0.15 (-0.26, -0.03)                             | 0.02    | -0.15 (-0.27, -0.03)                         | 0.02    |
| Waist circumference (cm) (n=482)      | -0.88 (-1.87, 0.10)                              | 0.08    | -0.86 (-1.87, 0.15)                          | 0.09    |
| Skinfold measures (mm)                |                                                  |         |                                              |         |
| Biceps (n=479)                        | -0.48 (-0.98, 0.01)                              | 0.06    | -0.44 (-0.93, 0.06)                          | 0.08    |
| Triceps (n=478)                       | -0.14 (-0.68, 0.40)                              | 0.61    | -0.10 (-0.64, 0.45)                          | 0.71    |
| Subscapular (n=469)                   | -0.46 (-0.98, 0.06)                              | 0.09    | -0.38 (-0.89, 0.14)                          | 0.15    |
| Suprailiac (n=468)                    | -0.23 (-0.84, 0.37)                              | 0.45    | -0.23 (-0.83, 0.37)                          | 0.46    |
| Sum of 4 skinfolds (n=461)            | -1.09 (-2.85, 0.67)                              | 0.23    | -0.97 (-2.70, 0.77)                          | 0.27    |
| Thigh (n=324)                         | -0.31 (-1.39, 0.78)                              | 0.58    | -0.27 (-1.38, 0.84)                          | 0.63    |
| Sum of upper skinfolds (n=468)        | -0.90 (-2.21, 0.42)                              | 0.18    | -0.76 (-2.05, 0.53)                          | 0.25    |
| Sum of lower skinfolds (n=323)        | -0.36 (-1.91, 1.19)                              | 0.65    | -0.40 (-1.98, 1.18)                          | 0.62    |
| Bioimpedance (Ω) (n=409)              | 3.33 (-5.23, 11.89)                              | 0.45    | 3.50 (-5.14, 12.15)                          | 0.43    |
| Counts/min (increments of 20) (n=441) | -0.15 <sup>#</sup> (-0.34, 0.04)                 | 0.12    | -0.18 <sup>#</sup> (-0.36, 0.01)             | 0.06    |
| MVPA min/24h (n=441)                  | 1.52 (-2.14, 5.17)                               | 0.42    | 0.51 (-2.97, 3.99)                           | 0.77    |
| <b>School</b>                         |                                                  |         |                                              |         |
| Energy (KJ) (n=358)                   | -78.78 (-240.75, 83.18)                          | 0.34    | -86.02 (-250.29, 78.20)                      | 0.30    |
| Fruit and vegetables (grams) (n=358)  | 59.88 (34.56, 85.19)                             | <0.001  | 63.35 (37.53, 89.17)                         | <0.001  |
| Sugar (grams) (n=358)                 | -3.86 (-7.27, -0.45)                             | 0.03    | -3.86 (-7.37, -0.36)                         | 0.03    |
| <b>Home</b>                           |                                                  |         |                                              |         |
| Energy (KJ)(n=61)                     | 1322.94 (-292.75, 2938.60)                       | 0.12    | 1534.73 (-117.74, 3187.20)                   | 0.07    |
| Fruit & vegetables (grams) (n=61)     | 21.61 (-81.26, 124.47)                           | 0.68    | 18.98 (-89.43, 127.40)                       | 0.73    |
| Sugar (grams) (n=61)                  | 6.88 (-17.04, 30.81)                             | 0.57    | 9.17 (-15.16, 33.51)                         | 0.45    |
| <b>24h dietary intake</b>             |                                                  |         |                                              |         |
| Energy (KJ) (n=61)                    | 883.16 (-888.31, 2654.66)                        | 0.32    | 1092.36 (-723.33, 2908.09)                   | 0.23    |

1  
2  
3  
4  
5  
6  
7  
8  
9  
10  
11  
12  
13  
14  
15  
16  
17  
18  
19  
20  
21  
22  
23  
24  
25  
26  
27  
28  
29  
30  
31  
32  
33  
34  
35  
36  
37  
38  
39  
40  
41  
42  
43  
44  
45  
46  
47  
48  
49

| Outcome variable*                 | Intervention vs. Control (adjusted for baseline) | p value | Intervention vs. Control (finally adjusted)† | p value |
|-----------------------------------|--------------------------------------------------|---------|----------------------------------------------|---------|
| Fruit & vegetables (grams) (n=61) | 89.64 (-32.51, 211.79)                           | 0.15    | 86.70 (-42.92, 216.32)                       | 0.19    |
| Sugar (grams) (n=61)              | 3.16 (-22.74, 29.07)                             | 0.81    | 4.23 (-22.00, 30.47)                         | 0.75    |

\*n indicates the number of participants included in each finally adjusted model

†Adjusted for age, sex, ethnicity and baseline values

For peer review only



## Discussion

We demonstrated the feasibility of delivering a multicomponent obesity prevention intervention targeting dietary and physical activity behaviours to a socioeconomically disadvantaged, multiethnic population of primary school aged children. The feasibility study provided an opportunity to refine and modify the programme and yielded important information on acceptability and feasibility of both the intervention and measurements required for assessing outcomes in a definitive RCT.

### *Strengths and limitations*

This is one of few studies focusing on SA populations, which comprise the largest minority ethnic group in the UK, with higher risk of obesity and its consequences. The iterative process of intervention refinement was informed by the MRC framework for complex interventions. Whilst the framework has been used for development of other interventions in NHS settings, we have demonstrated its use in the wider community setting.

The components of the intervention were influenced by stakeholder views and available resources, thus its applicability for wider populations and settings is potentially limited. However, the multifaceted intervention aimed to modify school and family environments and included elements that have been identified as promising in systematic reviews.[7,23] Furthermore the intervention components have theoretical validity for behaviour change in any population, and the incorporated techniques are transferrable. The targeting of South Asian stakeholders for intervention development is likely to have allowed us to exclude intervention components that would not be acceptable to this sub-population. Nevertheless, the developed intervention is likely to be acceptable not only in these ethnic groups, but also in the wider UK population.

Delivery of intervention, undertaken by staff outside the research team, was non-standardised. This allowed a pragmatic approach to be tested, which could be more easily rolled out. Intervention components delivered directly to the children and through school staff (physical activity component and Villa Vitality) were more likely to have high uptake than those delivered to families (leisure taster

1  
2 sessions or walk leader training). The complexity of delivering community based interventions targeting  
3  
4 children probably explains why most previous trials are school based.  
5

6  
7 During the trial, all children in schools allocated to the intervention arm were exposed to the intervention  
8  
9 components. However, only about half had consent for measurements. We found no significant  
10  
11 differences in sex and ethnicity between consented and non-consented children. Further, the distribution  
12  
13 of weight status among children who were measured is similar to national data for this age group[24],  
14  
15 suggesting that selection bias was unlikely.  
16

### 17 18 19 ***Intervention acceptability and feasibility***

20  
21 A variety of intervention techniques were incorporated with variable success. Environmental restructuring  
22  
23 (structured physical activity and play opportunities in school) was feasible and generally accepted.

24  
25 Demonstration of the target behaviour and prompting practice (Villa Vitality, cooking workshops, taster  
26  
27 activity sessions and walking groups) had mixed results. Apart from Villa Vitality which was  
28  
29 incorporated within the school setting, there was limited participation, despite enthusiasm amongst those  
30  
31 who did take part. At a population level, these types of intervention are less feasible to deliver, unless  
32  
33 they are incorporated within the school setting. Providing information and prompting identification of  
34  
35 role models were feasible and acceptable and would be replicable in a larger trial. Techniques to prompt  
36  
37 self monitoring and rewarding successful behaviour were acceptable, but had limited success in this  
38  
39 community setting.  
40  
41  
42

43  
44 During the period of intervention delivery, we used a variety of methods and involved different  
45  
46 stakeholders (school staff, parents and children), to assess the acceptability of the intervention  
47  
48 components. We also allowed the programme to be modified and the implementation of elements to vary  
49  
50 in the different intervention schools. This tailoring to the local school context was critical in determining  
51  
52 the success of the intervention. For example in one school, lunchtime supervisors were trained to deliver a  
53  
54 structured physical activity programme at lunchtime, but did not go on to deliver the programme.  
55  
56

57  
58 Following this failure of implementation, an enthusiastic teaching assistant was trained, who successfully  
59  
60

1  
2 delivered the intervention. Thus, whilst standardisation of aspects of the intervention is important, some  
3  
4 scope for tailoring to local context in terms of implementation and delivery needs to be considered.[25]  
5  
6  
7  
8  
9

### 10 *Informing a definitive RCT*

11  
12 The intervention was aimed at predominantly SA populations residing in inner city settings. Despite  
13  
14 challenges, including language barriers, 80% were successfully followed up. We demonstrated the  
15  
16 feasibility of undertaking a wide range of anthropometric measures within school and the feasibility of  
17  
18 Actiheart monitors for assessing physical activity in free living children (approximately 90% had usable  
19  
20 data). Assessment of dietary intake was less successful at baseline, mainly due to language barriers and  
21  
22 difficulties for parents in completing the forms, but the feasibility study allowed us to refine the  
23  
24 administration of the tool, so that measurement was more complete at follow up.  
25  
26  
27

28  
29 Although the feasibility study was not powered to examine intervention outcomes, we did find that the  
30  
31 direction of effect for most outcomes were in favour of the intervention, supporting the need for a  
32  
33 definitive trial. In particular, at follow up children in intervention schools had BMI z-scores on average  
34  
35 0.15kg/m<sup>2</sup> lower than children in control schools, which is in keeping with the effect size reported in a  
36  
37 meta-analysis of childhood obesity prevention trials.[7]  
38  
39

40  
41 The costs of the intervention were not formally examined, as this was a feasibility study and the  
42  
43 intervention components were being modified and tested. Nevertheless the feasibility stage provided an  
44  
45 opportunity to consider resource requirements and to modify the intervention accordingly to inform a  
46  
47 definitive study. In order to ensure sustainability, most intervention components were adapted from  
48  
49 existing services commissioned by the local NHS bodies at the time (including Villa Vitality, cooking  
50  
51 courses and training of walk leaders). The resources for training teachers to deliver structured physical  
52  
53 activity sessions are available commercially to schools, and were compiled by the research team. The  
54  
55 signposting information for local leisure facilities and for the weekend activities was similarly compiled  
56  
57 by the research team, summarising already available services and facilities.  
58  
59  
60

## Conclusions

We have used the MRC framework for complex interventions to develop a childhood obesity prevention intervention that can be evaluated within the context of a cluster-RCT. Although the intervention was informed by stakeholders, and evidence and guidelines from previous literature, some elements were found not to be feasible or acceptable to participants in practice. The feasibility study was an essential step in finalising the intervention programme prior to definitive evaluation. Based on the findings from this study, a definitive cluster-RCT is currently underway to assess the clinical and cost-effectiveness of the finalised intervention in primary school children (ISRCTN97000586).

## Acknowledgements

S Passmore (Birmingham City Council) advised the study team on identification and engaging of schools and pupils, and the tailoring of interventions to be acceptable to schools.

M Howard (Heart of Birmingham PCT) facilitated the delivery of some of the intervention components through the Primary Care Trust.

E McGee (Birmingham Community Nutrition and Dietetic Service) oversaw the delivery of the cooking workshops and contributed to their evaluation.

K Westgate and S Mayle (MRC Epidemiology Unit, Cambridge) undertook cleaning, reducing and analysing the physical activity data.

C Cleghorn (University of Leeds) contributed to the development of the CADET, oversaw staff training and administration of the tool, and undertook cleaning and analysis of the dietary data.

The sponsor of the study (University of Birmingham) had no role in the study design, data collection, data analysis, data interpretation, writing of the report, or in the decision to submit the paper.

## Contributors Statement

Peymané Adab: Dr. Adab conceptualized and designed the study overall, oversaw study planning, delivery and evaluation, wrote the analysis plan and drafted and revised the paper and approved the final manuscript as submitted. She is a guarantor.

Miranda Pallan: Dr. Pallan assisted in the overall delivery of the study, designed the process evaluation, undertook the data cleaning and analysis. She has approved the final manuscript as submitted, and is also a guarantor.

Janet Cade: Professor Cade designed the dietary data assessment tool, oversaw training for researchers collecting data and the analysis of the dietary data obtained. She has approved the final manuscript as submitted.

Ulf Ekelund: Dr. Ekelund advised on physical activity assessment, provided training of researchers in collecting Actiheart data and oversaw the analysis of physical activity data from Actihearts. He has approved the final manuscript as submitted.

Timothy Barrett: Professor Barrett advised on anthropometric measurement tools used, arranged for training of research staff to undertaken measures and advised on interpretation of the anthropometric data obtained. He has approved the final manuscript as submitted.

Amanda Daley: Dr. Daley advised on physical activity components of the intervention and use of incentives to motivate children. She has approved the final manuscript as submitted.

Jonathan Deeks: Professor Deeks provided statistical support, advised on statistical analysis and on using the data obtained to inform sample size estimation for the definitive trial. He has approved the final manuscript as submitted.

Joan Duda: Professor Duda advised on the psychological measurement instruments, advised research staff on child protection issues and contributed to shaping the physical activity components of the intervention. She has approved the final manuscript as submitted.

Paramjit Gill: Dr. Gill advised on anthropometric measurements to be included, the sampling strategy and on ethnic minority health. He has approved the final manuscript as submitted.

Jayne Parry: Professor Parry advised on process evaluation and contributed to the interpretation of qualitative data obtained. She has approved the final manuscript as submitted.

1  
2  
3 Raj Bhopal: Professor Bhopal advised on the anthropometric measurements, definition of the target  
4 population, tailoring of the intervention to be culturally appropriate and relevant literature on ethnicity  
5 and health. He also provided important comments on the final draft and has approved the final manuscript  
6 as submitted.  
7

8  
9 Kar Keung Cheng: Professor Cheng conceived the original idea informing this study, contributed to the  
10 planning and delivery. He has approved the final manuscript as submitted.  
11

12 All authors have contributed to the design of the intervention, advised on study progress and critically  
13 revised and approved the final manuscript.  
14

### 15 **Conflict of Interest Statement**

16  
17 All authors declare there was no support from any organisation for the submitted work; no financial  
18 relationships with any organisations that might have an interest in the submitted work in the previous  
19 three years; no other relationships or activities that could appear to have influenced the submitted work.  
20 Amanda Daley is supported by an NIHR Senior Research Fellowship award. The other authors have no  
21 disclosures relevant to this article. The views expressed in this publication are those of the authors and not  
22 necessarily those of the NHS, The National Institute for Health Research or the Department of Health.  
23 Primary Care Clinical Sciences is a member of the NIHR National School for Primary Care Research.  
24 The funding organisation did not play any role in design and conduct of the study; collection,  
25 management, analysis, and interpretation of the data; and preparation, review, or approval of the  
26 manuscript.  
27  
28  
29

### 30 **Data Sharing Statement**

31  
32 The BEACHeS study dataset is available on request from the study investigators.  
33

### 34 **Funding source**

35  
36 The Birmingham healthy Eating, Active lifestyle for Children Study (BEACHeS) was funded by the  
37 National Prevention Research Initiative (NPRI, <http://www.npri.org.uk>), Grant no. G0501292 and we are  
38 grateful to all the funding partners for their support: British Heart Foundation; Cancer Research UK;  
39 Department of Health; Diabetes UK; Economic and Social Research Council; Medical Research Council;  
40 Research and Development Office for the Northern Ireland Health and Social Services; Chief Scientist  
41 Office, Scottish Executive Health Department; Welsh Assembly Government and World Cancer Research  
42 Fund.  
43  
44

45 **Clinical Trial Registration:** ISRCTN51016370. The date of trial registration was delayed because this  
46 was a feasibility study. At the time of starting the study (2006), guidance on whether registration is  
47 required was ambiguous.  
48  
49

### 50 **Licence for Publication Statement**

51  
52  
53 “I Miranda Pallan, the Corresponding Author of this article contained within the original manuscript  
54 which includes any diagrams & photographs, other illustrative material, video, film or any other material  
55 howsoever submitted by the Contributor(s) at any time and related to the Contribution (“the  
56 Contribution”), have the right to grant on behalf of all authors and do grant on behalf of all authors, a  
57 licence to the BMJ Publishing Group Ltd and its licensees, to permit this Contribution (if accepted) to be  
58 published in BMJ Open and any other BMJ Group products and to exploit all subsidiary rights, as set out  
59 in the licence at: ([http://group.bmj.com/products/journals/instructions-for-authors/BMJOpen\\_licence.pdf](http://group.bmj.com/products/journals/instructions-for-authors/BMJOpen_licence.pdf))  
60

## References

- 1  
2  
3  
4  
5  
6 (1) Lobstein T, Baur L, Uauy R. Obesity in children and young people: a crisis in public health. *Obes Rev* 2004; **5**(Suppl. 1):4-85.
- 7  
8  
9  
10 (2) Baker JL, Olsen LW, Sorensen TIA. Childhood Body-Mass Index and the risk of coronary heart  
11 disease in adulthood. *N Engl J Med* 2007; **357**:2329-37.
- 12  
13 (3) Stamatakis E, Wardle J, Cole TJ. Childhood obesity and overweight prevalence trends in England:  
14 evidence for growing socioeconomic disparities. *Int J Obes* 2010; **34**:41-7.
- 15  
16 (4) NHS Information Centre for Health and Social Care. National Child Measurement Programme:  
17 England, 2011/12 school year. The Health and Social Care Information Centre, 2012.
- 18  
19 (5) Dinsdale H, Ridler C, Rutter H. National Child Measurement Programme: Changes in children's  
20 body mass index between 2006/7 and 2010/11. Oxford, National Obesity Observatory, 2012.
- 21  
22 (6) Summerbell CD, Waters E, Edmunds LD, et al. Interventions for preventing obesity in children.  
23 *Cochrane Database of Systematic Reviews* 2005, Issue 3, John Wiley & Sons, Ltd Chichester,  
24 UK, DOI: 10 1002/14651858 CD001871 pub2.
- 25  
26 (7) Waters E, de Silva-Sanigorski A, Hall B J, et al. Interventions for preventing obesity in children.  
27 *Cochrane Database of Systematic Reviews* 2011, Issue 12, John Wiley & Sons, Ltd Chichester,  
28 UK, DOI:10 1002/14651858 CD001871 pub3.
- 29  
30 (8) McPherson K, Marsh T, Brown M. Tackling obesities: future choices - modelling future trends in  
31 obesity and the impact on health. Report No. 2. London, Government Office for Science, 2007.
- 32  
33 (9) Wang Y, Wu Y, Wilson RF, et al. Childhood obesity prevention programs: comparative  
34 effectiveness review and meta-analysis. *Comparative Effectiveness Review* No. 115. Rockville,  
35 MD, Agency for Healthcare Research and Quality, 2013.
- 36  
37 (10) National Institute for Health and Clinical Excellence. Obesity: the prevention, identification,  
38 assessment and management of overweight and obesity in adults and children. London, 2006.
- 39  
40 (11) Campbell M, Fitzpatrick R, Haines A, et al. Framework for design and evaluation of complex  
41 interventions to improve health. *BMJ* 2000; **321**:694-6.
- 42  
43 (12) Pallan M, Parry J, Cheng KK, et al. Development of a childhood obesity prevention programme  
44 with a focus on UK South Asian Communities. *Prev Med* 2013; **57**:948-54.
- 45  
46 (13) Varni JW, Limbers CA, Burwinkle TM. How can young children reliably and validly self-report  
47 their health-related quality of life?: an analysis of 8,591 children across age subgroups with the  
48 PedsQL 4.0 generic core scales. *Health Qual Life Outcomes* 2007; **5**:1.
- 49  
50 (14) Marsh HW, Barnes J, Cairns L, et al. Self-Description Questionnaire: Age and sex effects in the  
51 structure and level of self-concept for preadolescent children. *J Educ Psychol* 1984; **76**:940-56.
- 52  
53 (15) Harter S, Pike R. The pictorial scale of perceived competence and social acceptance for young  
54 children. *Child Dev* 1984; **55**:1969-82.
- 55  
56 (16) Collins ME. Body figure perceptions and preferences among preadolescent children. *Int J Eat*  
57 *Disord* 1991; **10**:199-208.
- 58  
59  
60

- 1
  - 2
  - 3
  - 4
  - 5
  - 6
  - 7
  - 8
  - 9
  - 10
  - 11
  - 12
  - 13
  - 14
  - 15
  - 16
  - 17
  - 18
  - 19
  - 20
  - 21
  - 22
  - 23
  - 24
  - 25
  - 26
  - 27
  - 28
  - 29
  - 30
  - 31
  - 32
  - 33
  - 34
  - 35
  - 36
  - 37
  - 38
  - 39
  - 40
  - 41
  - 42
  - 43
  - 44
  - 45
  - 46
  - 47
  - 48
  - 49
  - 50
  - 51
  - 52
  - 53
  - 54
  - 55
  - 56
  - 57
  - 58
  - 59
  - 60
- (17) Cade JE, Frear L, Greenwood DC. Assessment of diet in young children with an emphasis on fruit and vegetable intake: using CADET – Child and Diet Evaluation Tool. *Public Health Nutr* 2006; **9**:501-8.
- (18) Brage S, Brage N, Franks P, et al. Reliability and validity of the combined heart rate and movement sensor Actiheart. *Eur J Clin Nutr* 2005; **59**:561-70.
- (19) Pallan M., Parry J., Adab P. Contextual influences on the development of obesity in children: a case study of UK South Asian communities. *Prev Med* 2012; **54**:205-11.
- (20) Michie S, Ashford S, Sniehotta FF, et al. A refined taxonomy of behaviour change techniques to help people change their physical activity and healthy eating behaviours: the CALO-RE taxonomy. *Psychol Health* 2011; **26**:1479-98.
- (21) Cole TJ, Freeman JV, Preece MA. Body mass index reference curves for the UK, 1990. *Arch Dis Child* 1995; **73**:25-9.
- (22) Corder K, Brage S, Wareham NJ, et al. Comparison of PAEE from combined and separate HR and movement models in children. *Med Sci Sports Exerc* 2005; **37**:1761-7.
- (23) Lavelle HV, Mackay DF, Pell JP. Systematic review and meta-analysis of school-based interventions to reduce body mass index. *J Public Health* 2012; **34**:360-9.
- (24) National Obesity Observatory. National Child Measurement Programme: detailed analysis of the 2007/08 national dataset. London, 2009.
- (25) Hawe P, Shiell A, Riley T. Complex interventions: how "out of control" can a randomised controlled trial be? *BMJ* 2004; **328**:1561-3.



1  
2  
3  
4  
5  
6  
7  
8  
9  
10  
11  
12  
13  
14  
15  
16  
17  
18  
19  
20  
21  
22  
23  
24  
25  
26  
27  
28  
29  
30  
31  
32  
33  
34  
35  
36  
37  
38  
39  
40  
41  
42  
43  
44  
45  
46  
47  
48  
49  
50  
51  
52  
53  
54  
55  
56  
57  
58  
59  
60

**Figure 1: Flow diagram of recruitment and follow up of participants in the feasibility study**

For peer review only

**Title: Preventing childhood obesity, phase II feasibility study focusing on South Asians: BEACHeS**

**Authors:** Peymané Adab (MD)<sup>1</sup>, Miranda Pallan (PhD)<sup>1</sup>, Janet Cade (PhD)<sup>2</sup>, Ulf Ekelund (PhD)<sup>3</sup>, Timothy Barrett (PhD)<sup>4</sup>, Amanda Daley (PhD)<sup>1</sup>, Jonathan Deeks (PhD)<sup>1</sup>, Joan Duda (PhD)<sup>5</sup>, Paramjit Gill (DM)<sup>1</sup>, Jayne Parry (MD)<sup>1</sup>, Raj Bhopal (PhD)<sup>6</sup>, KK Cheng (PhD)<sup>1</sup>

**Affiliations:**

<sup>1</sup>School of Health & Population Sciences (Public Health, Epidemiology and Biostatistics and Primary Care Clinical Sciences), University of Birmingham

<sup>2</sup>Nutritional Epidemiology Group, School of Food Science and Nutrition, University of Leeds

<sup>3</sup>MRC Epidemiology Unit, Institute of Metabolic Science, Cambridge & Department of Sport Medicine, Norwegian School of Sport Sciences

<sup>4</sup>School of Clinical and Experimental Medicine, University of Birmingham

<sup>5</sup>Sport & Exercise Sciences, The University of Birmingham

<sup>6</sup>Edinburgh Ethnicity and Health Research Group, Centre for Population Health Sciences, University of Edinburgh

**Address correspondence to:**

Miranda J Pallan, Public Health, Epidemiology and Biostatistics, University of Birmingham, Edgbaston, Birmingham, B15 2TT, UK.

Tel: +441214147990

Fax: +441214147878

E-mail: m.j.pallan@bham.ac.uk

**Key words:** Childhood obesity prevention; feasibility study; MRC framework for complex interventions

**Word count:**

Abstract: 273

Manuscript: 3743

## Abstract

**Objectives:** To assess feasibility and acceptability of a multifaceted, culturally appropriate intervention for preventing obesity in South Asian children, and to obtain data to inform sample size for a definitive trial.

**Design:** Phase II **feasibility study** of a complex intervention.

**Setting:** Eight primary schools in inner city Birmingham, UK, within populations that are predominantly South Asian.

**Participants:** 1090 children aged 6-8 years took part in the intervention. 571 (85.9% from South Asian background) underwent baseline measures. 85.5% (n=488) were followed up 2 years later.

**Interventions:** The one-year intervention consisted of school and family based activities, targeting dietary and physical activity behaviours. The intervention was modified and refined throughout the period of delivery.

**Main outcome measures:** Acceptability and feasibility of the intervention and of measurements required to assess outcomes in a definitive trial. The difference in BMI z-score between arms was used to inform sample size calculations for a definitive trial.

**Results:** Some intervention components (increasing school physical activity opportunities, family cooking skills workshops, signposting of local leisure facilities and attending day event at a football club) were feasible and acceptable. Other components were acceptable, but not feasible. Promoting walking groups was neither acceptable nor feasible. At follow up, children in the intervention compared with the control group were less likely to be obese (OR 0.41; 0.19 to 0.89), and had lower adjusted BMI z-score [-0.15 (-0.27, -0.03)].

**Conclusions:** The **feasibility study** informed components for an intervention programme. The favourable direction of outcome for weight status in the intervention group supports the need for a definitive trial. A cluster randomised controlled trial is now underway to assess the clinical and cost-effectiveness of the intervention.

## Article Summary

### *Strengths and limitations of the study*

- We report the findings of a **feasibility study** of a childhood obesity prevention intervention that focuses on primary school-aged children from South Asian communities in the UK. Despite their susceptibility to the cardiometabolic consequences of obesity, little obesity prevention research has been undertaken in these communities previously.
- The early phases of the UK Medical Research Framework for complex health interventions has guided the intervention development and evaluation process undertaken in this **feasibility study**.
- The feasibility and acceptability of the childhood obesity prevention intervention components was variable and context dependent, however, the exploratory nature of the study enabled us to modify and refine delivery of the intervention throughout.
- Development and evaluation of the feasibility and acceptability of the intervention was undertaken in materially disadvantaged, predominantly South Asian communities, thus its transferability would be dependent on tailoring to the specific local context.
- The final intervention programme, following modification and refinement in this **feasibility study**, is being definitively evaluated in an ongoing cluster-randomised controlled trial.

## Introduction

Childhood obesity is a growing problem worldwide.[1] Apart from psychological and social problems, longitudinal studies show adverse future health consequences in children as young as 7 years old who are obese.[2] In the UK, although childhood overweight prevalence has stabilised, socioeconomic disparities have widened, with increasing trend in more deprived sub-populations.[3] Data from the national childhood surveillance programmes in England show that at school entry (age 4-5 years), 9.5% of children are obese (i.e., above 95<sup>th</sup> percentile for national reference standards), but this prevalence doubles (19.2%) by the end of primary school (age 11).[4] The rate of increase among children from South Asian (SA) ethnic groups, especially girls, is greater than that for the population as a whole (increasing trend of 1.13% and 0.66% per year for Bangladeshi and Pakistani girls respectively, compared with 0.35% yearly increase in White British).[5] Thus the primary school period presents a key phase for prevention, and SA are an important target group.

However, despite numerous systematic reviews,[6,7] reports[8,9] and guidelines,[10] evidence for effective approaches to prevention is limited, particularly among minority ethnic groups. Relevant trials suggest that multifaceted school-based interventions have potential, particularly those that also include a home or community element, but the most effective combination of components is not clear.[7,9] The need for involving stakeholders, such as families, schools and local communities, in the decision making regarding potential intervention strategies has been highlighted.[6] Furthermore, for a complex intervention such as obesity prevention, which has several interconnecting components, a rigorous and iterative phased approach is required to improve study design, execution and applicability of results. The UK Medical Research Council (MRC) proposed a framework for such interventions.[11] Given the growing problem of obesity and lack of clarity on effective approaches to

1  
2  
3 prevention, it would be unwise to embark on another trial without thorough attention to the  
4  
5 early phases described in the MRC framework.  
6

7  
8 The Birmingham healthy Eating and Active lifestyle for CHildren Study (BEACHeS  
9  
10 <http://www.birmingham.ac.uk/research/activity/mds/projects/HaPS/PHEB/WAVES/BEACH>  
11 [eS/index.aspx](http://www.birmingham.ac.uk/research/activity/mds/projects/HaPS/PHEB/WAVES/BEACH)), used the theoretical and modelling phases of the MRC framework to develop  
12  
13 a multifaceted childhood obesity prevention programme, targeting SA children (phase I).[12]  
14  
15 Here we report on the **feasibility study** (phase II). The aim was to assess feasibility and  
16  
17 acceptability of the intervention. In addition we wanted to obtain data to inform a definitive  
18  
19 (phase III) cluster-randomised controlled trial (RCT).  
20  
21  
22  
23  
24  
25  
26  
27  
28  
29  
30  
31  
32  
33  
34  
35  
36  
37  
38  
39  
40  
41  
42  
43  
44  
45  
46  
47  
48  
49  
50  
51  
52  
53  
54  
55  
56  
57  
58  
59  
60

## Materials and Methods

The **feasibility study** was conducted in eight Birmingham primary schools from 2006 to 2009. Children underwent baseline measures between December 2006 and June 2007. Four schools were selected to receive the intervention (2007/8 academic year), and the remainder had no active intervention. Follow up data were collected two years after baseline.

### *Setting*

Birmingham is UK's second city with a high minority ethnic population (34%), one fifth being from the three main SA communities (Pakistani, Bangladeshi and Indian). We obtained a list of all Local Authority-maintained primary schools in Birmingham. Of 304 schools, 52 had  $\geq 50\%$  of pupils from SA background (mean 75%). These, compared with the remainder, had a higher proportion of children eligible for free school meals (FSM), indicating higher deprivation. Schools were ranked in order of FSM eligibility, and those from either extreme were successively invited until 8 agreed to take part.

### *Participants*

Pupils from years 1 and 2 (aged 5-7 years) were invited to participate. Parents of the children were approached by letter distributed through the schools, and active **opt-in** consent was sought for their child to participate in measurements.

### *Baseline and follow up measures*

Age, sex and ethnicity data (from parent report at school entry) were obtained from school records on all eligible children in participating schools. Children with consent also underwent a range of anthropometric measurements, including standing height (measured to nearest 0.1cm with a Leicester Height Measure), weight (measured to nearest 0.1 kg with aTanita bioimpedance monitor), two measures of waist circumference (measured to nearest 0.5cm),

1  
2  
3 and skinfold thickness at five sites (biceps, triceps, subscapular, suprailiac and thigh;  
4  
5 measured using a Holtain calliper). Children also completed interviewer administered  
6  
7 questionnaires (not discussed in this paper, but including: quality of life (PedsQL),[13] self  
8  
9 concept (Marsh self-description questionnaire),[14] perceived physical competence (Harter  
10  
11 Pictorial Scale for Young Children),[15] and body image perception (adapted Collin's  
12  
13 Pictorial Image Scale)[16]). All measures were undertaken by trained researchers using  
14  
15 standard protocols.

16  
17  
18 Dietary intake was assessed using the Child And Dietary Evaluation Tool (CADET)[17]; a  
19  
20 24-hour food tick list that has been validated against a semi-weighed diary in children aged 3-  
21  
22 7 years. A researcher completed the CADET for children during school hours, and parents  
23  
24 were given instructions for completing it for the remainder of the 24 hour period. Physical  
25  
26 activity levels were assessed using the Actiheart monitor (CamnTech, Papworth UK) worn  
27  
28 for five consecutive days, including a weekend. This is validated for use in children<sup>18</sup> and  
29  
30 was set up to measure acceleration and heart rate at 30 second epochs. In addition, parents  
31  
32 were asked to complete questionnaires which included questions on family composition, and  
33  
34 family dietary and physical activity habits.

### 35 36 37 38 39 *Intervention*

40  
41  
42 The process for intervention development has been reported elsewhere,[12] but in brief, the  
43  
44 multicomponent intervention was developed by combining evidence from the literature with  
45  
46 views from key stakeholders **drawn from SA communities** (including parents, teachers,  
47  
48 school nurses, dieticians, community leaders, school governors, and retail and leisure  
49  
50 representatives close to schools) and a multi-disciplinary group of relevant professionals.  
51  
52 Important contextual data were gained from stakeholders, which was critical for informing  
53  
54 intervention development **and highlighted potential barriers (e.g. cultural unacceptability of**  
55  
56 **certain types of physical activity for girls), as well as opportunities for intervention (e.g.**  
57  
58  
59  
60



1  
2  
3 schools being considered a natural environment for providing skills to families), in relation to  
4  
5 SA communities.[12,19] A review of local facilities, resources and opportunities related to  
6  
7 healthy eating and the promotion of physical activity targeting children was used to inform  
8  
9 the design and encourage longer term sustainability of the intervention. We also took  
10  
11 account of national childhood obesity prevention policy during the development process to  
12  
13 try and ensure that the intervention had an impact that was additional to existing national  
14  
15 initiatives. The intervention targeted both diet and physical activity behaviours and consisted  
16  
17 of two main strands: i) increasing children's physical activity levels and promoting healthy  
18  
19 eating through schools, and ii) increasing skills among family members through family  
20  
21 educational activities. A number of intervention techniques (as defined in the CALO-RE  
22  
23 Taxonomy of behaviour changed techniques for physical activity and healthy eating[20])  
24  
25 were utilised to deliver each intervention component. A more detailed description of the  
26  
27 intervention is provided in Table 1.  
28  
29  
30  
31  
32  
33  
34  
35  
36  
37  
38  
39  
40  
41  
42  
43  
44  
45  
46  
47  
48  
49  
50  
51  
52  
53  
54  
55  
56  
57  
58  
59  
60

**Table 1: Intervention components and techniques<sup>20</sup> included in the BEACHeS intervention programme and findings from the process evaluation**

| Intervention component                                        | Aim                                                                                                          | Intervention techniques                                                                                      | Description                                                                                                                                                                                                                                                                                                                                                                                 | Agent responsible for delivery                                                                                                                                                                                                                            | Evaluation method                                                                                                                                                                                                            | Evaluation findings                                                                                                                                                                                                                                                                                                                                                                                                      |
|---------------------------------------------------------------|--------------------------------------------------------------------------------------------------------------|--------------------------------------------------------------------------------------------------------------|---------------------------------------------------------------------------------------------------------------------------------------------------------------------------------------------------------------------------------------------------------------------------------------------------------------------------------------------------------------------------------------------|-----------------------------------------------------------------------------------------------------------------------------------------------------------------------------------------------------------------------------------------------------------|------------------------------------------------------------------------------------------------------------------------------------------------------------------------------------------------------------------------------|--------------------------------------------------------------------------------------------------------------------------------------------------------------------------------------------------------------------------------------------------------------------------------------------------------------------------------------------------------------------------------------------------------------------------|
| <b>School based activities</b>                                |                                                                                                              |                                                                                                              |                                                                                                                                                                                                                                                                                                                                                                                             |                                                                                                                                                                                                                                                           |                                                                                                                                                                                                                              |                                                                                                                                                                                                                                                                                                                                                                                                                          |
| Physical activities within school day                         | To increase the amount of time that children are physically active within the school day                     | Environmental restructuring<br>Prompt practice                                                               | Three elements introduced into schools:<br>1. 'Wake Up Shake Up': a short (10 minutes) organised daily dance or exercise routine to music<br>2. Organised playground activities at lunch and break times through the training of school staff to act as "play leaders"<br>3. 'Take 10': teaching resource which links 10 minutes physical activity in the classroom to curricular subjects. | Trained school staff (including teachers, teaching assistants or lunch time assistants). The decision of which staff members to train for this component took into account individual school circumstances and was made in consultation with each school. | <ul style="list-style-type: none"> <li>• Interviews with school staff</li> <li>• Observation of sessions in schools</li> <li>• Self-completion questionnaires administered to children and parents</li> </ul>                | Overall, school staff with a responsibility for health were enthusiastic and committed to introducing these schemes, and all schemes were acceptable to children. Individual school and staff factors strongly influence the success of each element in the different schools. Parents, in general felt that the amount of physical activity their children were undertaking in school had increased over the last year. |
| Incentive scheme to encourage physical activity out of school | To increase the amount of time outside of school hours that children spend doing leisure physical activities | Prompt self monitoring of behaviour<br>Prompt practice<br>Provide rewards contingent on successful behaviour | Children received a sticker collection card from school and information on local participating sports and leisure venues. Each time a child attended a venue, they collected a sticker. The child with the most stickers in each school received a prize.                                                                                                                                   | Sticker collection card delivered through school class teacher. Stickers handed out by staff at leisure venues.                                                                                                                                           | <ul style="list-style-type: none"> <li>• Interviews with school staff</li> <li>• Telephone survey of leisure venue staff</li> <li>• Assessment of returned collection cards</li> <li>• Questionnaires to children</li> </ul> | Although this type of incentive scheme appears acceptable to children, parents and school staff alike, it was not feasible in terms of maintaining cooperation of participating venues. An element that was well received and could be retained, is the signposting information given to children and families.                                                                                                          |
| Attendance at a course run by a Premier league                | To encourage physical activity and healthy eating through                                                    | Provide information on consequences of behaviour<br>Model/demonstrate                                        | School classes attend a 'Villa Vitality' day. Half the day is spent with Football Club coaches, exercising and learning football                                                                                                                                                                                                                                                            | Aston Villa Football Club Community programme staff deliver on day of visit to club.                                                                                                                                                                      | <ul style="list-style-type: none"> <li>• Interviews with school staff</li> <li>• Self-completion questionnaires to parents</li> </ul>                                                                                        | This was highly acceptable to children and school staff and is feasible to deliver to the target age group. There is some evidence that it may favourably alter children's health-                                                                                                                                                                                                                                       |

|                                                             |               |                                |                                                                                       |                                                                                                                                                                                                                                             |                                                                  |                                                                                                               |             |
|-------------------------------------------------------------|---------------|--------------------------------|---------------------------------------------------------------------------------------|---------------------------------------------------------------------------------------------------------------------------------------------------------------------------------------------------------------------------------------------|------------------------------------------------------------------|---------------------------------------------------------------------------------------------------------------|-------------|
| 1<br>2<br>3<br>4<br>5<br>6<br>7<br>8<br>9<br>10<br>11<br>12 | football club | an iconic sporting institution | behaviour<br>Prompt identification of role model/advocate<br>Goal setting (behaviour) | skills, and the other half of the day is an interactive learning session on healthy eating and healthy lifestyles. Teachers provided with material to deliver over 6 weeks to reinforce messages, and encourage weekly challenges or goals. | School class teachers deliver 6 weekly lessons after club visit. | •Pre- and 6-week post intervention questionnaires (knowledge, attitudes & behaviour) administered to children | behaviours. |
|-------------------------------------------------------------|---------------|--------------------------------|---------------------------------------------------------------------------------------|---------------------------------------------------------------------------------------------------------------------------------------------------------------------------------------------------------------------------------------------|------------------------------------------------------------------|---------------------------------------------------------------------------------------------------------------|-------------|

### Increasing skills of families through activity-based learning

|                                                                                  |                                                                               |                                                                                                                            |                                                                                                                                                                                         |                                                                                                                                                                                                                                                                                                                                  |                                                                                                                                                                                              |                                                                                                                            |                                                                                                                                                                                                                                                                                                                             |
|----------------------------------------------------------------------------------|-------------------------------------------------------------------------------|----------------------------------------------------------------------------------------------------------------------------|-----------------------------------------------------------------------------------------------------------------------------------------------------------------------------------------|----------------------------------------------------------------------------------------------------------------------------------------------------------------------------------------------------------------------------------------------------------------------------------------------------------------------------------|----------------------------------------------------------------------------------------------------------------------------------------------------------------------------------------------|----------------------------------------------------------------------------------------------------------------------------|-----------------------------------------------------------------------------------------------------------------------------------------------------------------------------------------------------------------------------------------------------------------------------------------------------------------------------|
| 13<br>14<br>15<br>16<br>17<br>18<br>19<br>20<br>21<br>22<br>23<br>24<br>25<br>26 | Cooking courses for family members                                            | To increase healthy cooking skills and confidence and influence dietary behaviour                                          | Provide information on consequences of behaviour in general<br>Model/demonstrate behaviour<br>Provide instruction on how to perform the behaviour<br>Prompt generalisation of behaviour | Five week courses on healthy cooking were delivered through schools to parents or other family members, some courses include children. Courses ran successively to allow all parents to attend if they wanted. Healthy recipes were distributed to support the course content.                                                   | Birmingham Community NHS Trust dietetics staff.                                                                                                                                              | •Interviews with school staff<br>•Uptake rates for courses<br>•Participant pre and post-course questionnaires              | This component was popular with those who participated and there was some evidence that it influenced confidence and cooking practices. Running sessions for parents and children was the most popular model, and having the sessions based in school time for children and inviting parents to attend improved attendance. |
| 27<br>28<br>29<br>30<br>31<br>32<br>33<br>34<br>35<br>36<br>37<br>38             | Information on local leisure opportunities and “taster” sessions for families | To equip families with the knowledge and skills to undertake physical activities with their children in their leisure time | Provide information on when and where to perform behaviour<br>Model/demonstrate behaviour                                                                                               | Parents were given information on local sporting and leisure venues and events. They were invited to attend weekend taster sessions with their children, through school. Activities range from cricket and football, to archery, climbing and dry-slope skiing. There was no cost for the activities and transport was provided. | BEACHeS research staff compiled list of venues and prepared signposting sheets. BEACHeS research staff accompanied families to leisure venues, where leisure venue staff delivered sessions. | •Interviews with school staff<br>•Uptake of the taster sessions<br>•Self-completion questionnaires to parents and children | This component was resource intensive to deliver, and uptake was very low. However, the signposting information was used by families, and was appreciated.                                                                                                                                                                  |

1  
2  
3  
4  
5  
6  
7  
8  
9  
10  
11  
12  
13  
14  
15  
16  
17  
18  
19  
20  
21  
22  
23  
24  
25  
26  
27  
28  
29  
30  
31  
32  
33  
34  
35  
36  
37  
38  
39  
40  
41  
42  
43  
44  
45  
46  
47  
48  
49

|                                                                |                                                                                             |                                                    |                                                                                                                                                                                    |                                                                                 |                                                                                                                                                                      |                                                                                                                                                                                                                                                                                              |
|----------------------------------------------------------------|---------------------------------------------------------------------------------------------|----------------------------------------------------|------------------------------------------------------------------------------------------------------------------------------------------------------------------------------------|---------------------------------------------------------------------------------|----------------------------------------------------------------------------------------------------------------------------------------------------------------------|----------------------------------------------------------------------------------------------------------------------------------------------------------------------------------------------------------------------------------------------------------------------------------------------|
| Training walk leaders to initiate community walking programmes | To increase walking by families and other community members through organised leisure walks | Model/demonstrate behaviour<br><br>Prompt practice | Community volunteers were recruited through schools to become trained walk leaders. Training was provided to equip volunteers to organise and lead walks in their local community. | Walk-leader training programme delivered through Heart of Birmingham NHS Trust. | <ul style="list-style-type: none"> <li>• Assessment of numbers attending training to be walk leaders</li> <li>• Monitoring numbers joining walking groups</li> </ul> | This component proved unfeasible, as there was a lack of volunteers. Even those who expressed an initial interest failed to attend the training. Despite repeated efforts to recruit community volunteers, no one attended the training in any of the four BEACHeS intervention communities. |
|----------------------------------------------------------------|---------------------------------------------------------------------------------------------|----------------------------------------------------|------------------------------------------------------------------------------------------------------------------------------------------------------------------------------------|---------------------------------------------------------------------------------|----------------------------------------------------------------------------------------------------------------------------------------------------------------------|----------------------------------------------------------------------------------------------------------------------------------------------------------------------------------------------------------------------------------------------------------------------------------------------|

For peer review only

### *Allocation of intervention*

This was a non-randomised feasibility trial. After baseline measurements were completed, schools were allocated to intervention or control arms. We matched schools by size, and proportion of children eligible for FSM. We then took the geographical location of the schools into account and allocated the matched pairs to either the intervention or control arm so that we minimised the chance of contamination between the two arms.

### *Process measures*

The main aim of the study was to assess intervention feasibility and acceptability. Each component was evaluated separately, using a variety of methods. These included collection of uptake data, direct observation, questionnaires to children and parents and interviews with key school staff. The questionnaires were also used to evaluate overall perceptions of the intervention and engagement with different intervention components. Topics covered in the semi-structured interviews included exploration of how the different intervention components were implemented, which elements were perceived to work well and ideas for further development. The interviews were tape-recorded, transcribed and analysed thematically.

### *Other measures and analysis*

We assessed the feasibility of obtaining outcome data, primarily body mass index (BMI), but also diet and physical activity and other anthropometric measures as described above.

Exploratory comparison between intervention and control children was also undertaken to determine effect size.

Height and weight data were used to calculate BMI ( $\text{kg}/\text{m}^2$ ) and converted into standard deviation scores (BMI z-score) using the UK 1990 growth reference charts.[21] Children were categorised as underweight, healthy weight, overweight or obese using the 2<sup>nd</sup>, 85<sup>th</sup> and 95<sup>th</sup> centile cut-offs. For waist circumference and skinfolds, the mean was used for analyses.

1  
2  
3 Skinfold measures were combined to obtain sum, upper (biceps, triceps and subscapular) and  
4  
5 lower (suprailiac and thigh) skinfolds.  
6

7  
8 Data from the CADET were coded and analysed by a food diary analysis program (DANTE,  
9  
10 University of Leeds) to estimate total energy intake (KJ) and amount of fruit and vegetables,  
11  
12 and sugar consumed. Data on foods consumed in school and at home were analysed  
13  
14 separately, then combined to obtain estimates for the complete 24 hour measurement period.  
15

16  
17 Accelerometry data were used to assess physical activity levels ([http://www.mrc-  
18  
19  
20  
21  
22  
23  
24  
25  
26  
27  
28  
29  
30  
31  
32](http://www.mrc-epid.cam.ac.uk/Research/Programmes/Programme_5/InDepth/Programme%205_Downloads.html)). Total daily volume of physical activity was estimated and expressed as average counts  
per minute (cpm). The mean duration of daily moderate to vigorous physical activity  
(MVPA, min/day) was calculated (400 cpm cut-off for lower threshold).[22] The proportion  
participating in  $\geq 60$  minutes MVPA (as recommended by international guidelines) was also  
calculated.

33  
34 **Statistical analyses were undertaken using STATA (v11).** The intraclass correlation  
35  
36 coefficient (ICC) for the main outcome (BMI z-score) was calculated, but because of the  
37  
38 small number of schools, clustering was not taken into account for the analysis. We analysed  
39  
40 final BMI, diet and physical activity levels of children in the intervention, compared with  
41  
42 those in the control group. **To adjust for baseline differences, we initially developed multiple  
43  
44  
45  
46  
47  
48  
49  
50  
51  
52  
53  
54** linear regression models, which included the relevant baseline values of BMI, dietary factors  
or physical activity measures as covariates. Further models were then developed which also  
included potential confounders as covariates (age, sex, ethnicity). Logistic regression was  
used to assess risk of obesity (compared with all non-obese children), and likelihood of  
meeting  $\geq 60$  minutes MVPA at follow up in the intervention, compared with control children.

### 55 56 57 ***Ethical approval*** 58 59 60

1  
2  
3 Ethical approval was granted by The Black Country Research Ethics Committee  
4  
5 (08/H1202/22). Approval was sought for active consent from parents for the child  
6  
7 measurements, whilst consent for participation in the intervention was at school level.  
8  
9  
10  
11  
12  
13  
14  
15  
16  
17  
18  
19  
20  
21  
22  
23  
24  
25  
26  
27  
28  
29  
30  
31  
32  
33  
34  
35  
36  
37  
38  
39  
40  
41  
42  
43  
44  
45  
46  
47  
48  
49  
50  
51  
52  
53  
54  
55  
56  
57  
58  
59  
60

## Results

### *Feasibility and acceptability of intervention components*

Some intervention components (particularly those delivered through school) were more successfully delivered than others. Intervention was modified during the course of delivery to optimise participation and in response to feedback. The findings are summarised in Table 1, and details are reported in the appendix.

Two intervention components were found to be unsuitable to include within an intervention programme in the format delivered. First was the scheme to incentivise out of school leisure activities. Poor co-operation from leisure venues and lack of resources to continually remind and motivate children contributed to the failure of this component. Second was the training of walk leaders. Despite effort to recruit through school staff, influential parents and various forms of publicity, volunteers were not forthcoming. The only person who underwent training did not undertake any walking groups.

One component was partially successful. Signposting of leisure facilities in the local area was popular among parents and school staff. However, attendance at organised taster sessions was poor, which was outweighed by the high staff and monetary resources required to deliver the component. The taster sessions were therefore not feasible to include in a larger trial.

The other intervention components had varying degrees of success, and the process evaluation highlighted how delivery could be improved. Individual school characteristics and differences between staff members strongly influenced the success of each element in the different schools.



### *Acceptability of allocation to control*

Acceptability of non-intervention was assessed through interviews with control school staff. All understood the need for a control arm. One would have liked alternative support to compensate for not being offered the intervention. In other control schools, staff expressed that being part of the study had benefitted them in other ways, and contributed to the school's status as a 'healthy school'.

### *Outcomes*

#### *Feasibility of outcome measures*

There were 1090 eligible children in the eight participating schools (range 54-180). Of these, 606 (55.6%) had parental consent and anthropometric measures were completed on those in school on measurement days (n=571, 94.2% of consented). Useable data ( $\geq 3$  days) for Actiheart were available for 508 (89.0%). Completion of CADET was more variable. Although 445 (77.9%) were returned at baseline, 269 (47.1%) were complete, of which two thirds (n=174) had usable data. Two years after the baseline measures, 488 children (85.5%) were successfully followed up. The proportion with usable Actiheart data was similar to baseline. However a higher proportion (n=454, 93%) had a completed CADET, although only 163 (36%) had usable home data.

#### *Findings from the feasibility study*

A total of 574 children were included in the trial (Figure 1), of whom 85.9% were SA. Baseline characteristics are summarised in Table 2 (anthropometric measures were completed for 571 of the 574 participating children). The age, sex and ethnicity of those who took part were similar in distribution to the characteristics of the non-consented eligible children.

1  
2  
3 Over 90% in both arms were from the most deprived areas, in keeping with the location and  
4 ethnic composition of the population. Around one in five (n=115) were overweight or obese.  
5  
6 This proportion was slightly higher in the control (21.7%) compared to the intervention  
7 (18.3%) schools. A similar pattern was seen for other measures of body fat (skinfold  
8 measures, bioimpedance), but not for waist circumference which was similar in intervention  
9 and control groups. Under half of the children (47.9%) undertook  $\geq 60$  minutes of MVPA.  
10  
11 Levels of physical activity (total cpm) and duration of time spent in MVPA were slightly  
12 higher among children from control, compared with intervention schools. Total dietary  
13 energy, fruit and vegetable and sugar intake were slightly higher among children in  
14 intervention, compared with control schools.  
15  
16  
17  
18  
19  
20  
21  
22  
23  
24

25  
26 Two-years post baseline, 254 (83.3%) children in the control and 234 (86.2%) in the  
27 intervention schools were successfully followed up. There was no significant difference in  
28 baseline weight status, MVPA, diet or sex, between those followed up, and those lost to  
29 follow up (data not shown). However, SA children were less likely to be lost to follow up  
30 (n=58; 11.9%) compared with those from other ethnic groups (n=28; 34.6%).  
31  
32  
33  
34  
35  
36  
37  
38  
39  
40  
41  
42  
43  
44  
45  
46  
47  
48  
49  
50  
51  
52  
53  
54  
55  
56  
57  
58  
59  
60

**Table 2: Baseline characteristics of children measured for the BEACHes feasibility study**

| Characteristic/Measure*             | Intervention group: N=269<br>n (%) or mean (SD) | Control group: N=305<br>n (%) or mean (SD) |
|-------------------------------------|-------------------------------------------------|--------------------------------------------|
| Sex (n=574)                         |                                                 |                                            |
| Male                                | 144 (53.5)                                      | 142 (49.8)                                 |
| Female                              | 125 (46.5)                                      | 153 (50.2)                                 |
| Age in years (n=574)                | 6.53 (0.59)                                     | 6.44 (0.58)                                |
| Ethnicity (n=574)                   |                                                 |                                            |
| Bangladeshi                         | 36 (13.4)                                       | 46 (15.1)                                  |
| Indian                              | 22 (8.2)                                        | 5 (1.6)                                    |
| Pakistani                           | 181 (67.3)                                      | 203 (66.6)                                 |
| Other                               | 30 (11.2)                                       | 51 (16.7)                                  |
| Townsend score decile (n=572)       |                                                 |                                            |
| 1 (most deprived)                   | 250 (93.3)                                      | 285 (93.8)                                 |
| 2                                   | 6 (2.2)                                         | 9 (3.0)                                    |
| 3                                   | 8 (3.0)                                         | 5 (1.6)                                    |
| 4-7                                 | 4 (1.5)                                         | 5 (1.6)                                    |
| BMI-SDS score (n=571)               | -0.03 (1.37)                                    | 0.08 (1.39)                                |
| Weight status (n=571)               |                                                 |                                            |
| Underweight                         | 6 (2.3)                                         | 10 (3.3)                                   |
| Healthy weight                      | 212 (79.4)                                      | 228 (75.0)                                 |
| Overweight                          | 15 (5.6)                                        | 27 (8.9)                                   |
| Obese                               | 34 (12.7)                                       | 39 (12.8)                                  |
| Waist circumference in cm (n=569)   | 55.6 (7.7)                                      | 55.3 (6.9)                                 |
| Skinfold measures in mm             |                                                 |                                            |
| Biceps (n=563)                      | 7.5 (3.6)                                       | 8.0 (4.0)                                  |
| Triceps (n=563)                     | 10.9 (4.1)                                      | 11.6 (4.5)                                 |
| Subscapular (n=559)                 | 7.5 (4.4)                                       | 7.9 (5.0)                                  |
| Suprailiac (n=561)                  | 7.0 (4.4)                                       | 7.4 (4.7)                                  |
| Sum of 4 skinfolds (n=556)          | 32.5 (14.7)                                     | 34.8 (16.8)                                |
| Thigh (n=433)                       | 14.4 (5.5)                                      | 15.7 (6.3)                                 |
| Sum of upper skinfolds (n=557)      | 25.7 (10.9)                                     | 27.5 (12.5)                                |
| Sum of lower skinfolds (n=433)      | 21.0 (8.8)                                      | 22.9 (10.1)                                |
| Bioimpedance ( $\Omega$ ) (n=521)   | 692.6 (72.5)                                    | 695.1 (80.8)                               |
| Physical activity (n=535)           |                                                 |                                            |
| Counts/min                          | 79.9 (23.4)                                     | 83.4 (27.3)                                |
| MVPA min/24h                        | 52.8 (28.4)                                     | 62.9 (25.0)                                |
| ≥60 mins MVPA per day (n=535)       | 100 (40.2)                                      | 156 (54.5)                                 |
| 1 day school dietary intake (n=441) |                                                 |                                            |
| Mean energy (KJ)                    | 2378.2 (1619.2)                                 | 1917.1 (1821.7)                            |
| Fruit and vegetables (grams)        | 140.6 (121.4)                                   | 105.8 (118.7)                              |
| Sugar (grams)                       | 41.0 (60.9)                                     | 35.3 (62.9)                                |
| 1 day home dietary intake (n=174)   |                                                 |                                            |
| Mean energy (KJ)                    | 7021.3 (3181.1)                                 | 6058.34 (3138.2)                           |
| Fruit and vegetables (grams)        | 329.85 (232.2)                                  | 267.95 (193.3)                             |
| Sugar (grams)                       | 105.36 (50.2)                                   | 93.50 (36.6)                               |
| 24h dietary intake (n=173)          |                                                 |                                            |
| Total energy (KJ)                   | 9326.6 (3083.7)                                 | 8397.3 (4035.5)                            |
| Fruit and vegetables (grams)        | 475.6 (261.4)                                   | 368.7 (220.2)                              |
| Sugar (grams)                       | 154.1 (108.7)                                   | 129.7 (85.8)                               |

\*n in this column indicates how many children had useable data for each characteristic/measure

### *Estimation of effect size to inform definitive trial*

Anthropometric, physical activity and dietary measures in intervention and control groups at follow up are shown in Table 3. The proportion of children who were overweight or obese had increased in all schools from baseline to follow up (from 7.3% to 9.9%, and from 12.8% to 19.1% for overweight and obese respectively). The risk of obesity was significantly lower in the intervention compared with the control group (OR 0.41; 0.19 to 0.89). The increase in BMI z-score was also significantly lower in the intervention compared with control, after adjustment [-0.15kg/m<sup>2</sup> (-0.27, -0.03)] (Table 4). A similar trend was seen for all other anthropometric measures, although none were statistically significant.

The ICC for the outcome “overweight/obese” compared to non-overweight, was 0.00 (95% CI (0, 0.02)), whilst for BMI z-score, the ICC was 0.01 (95% CI (0, 0.04)). Therefore, taking account of clustering in the analysis would make marginal difference to the findings.

The proportion of children who undertook ≥60 minutes MVPA reduced (from 48.8% to 27.1%) at follow up, with the reduction being greater among control (30.2%) compared with intervention (23.8%) children. The differences in physical activity levels at follow up were not significant between groups (Table 4).

Total energy intake had increased slightly at follow up (7473 KJ at baseline to 8130 KJ at follow up). There were no significant differences in dietary intake between control and intervention children, although 24 hour dietary intake data were only available for 163 (33%) children at follow up, and only 61 children had dietary data at both baseline and follow up.

However, school dietary intake data were more complete (93% with follow up data and 73% with both baseline and follow up data), and children in intervention schools had significantly more fruits and vegetables and lower sugar intake, compared with those in control schools (Table 4).

1  
2  
3 As the intervention was designed to be particularly relevant to SA children, we repeated the  
4  
5 multivariate analyses including only children of SA ethnicity. The mean differences and odd  
6  
7 ratios for the outcomes were of a similar magnitude to the main analyses (results not shown).  
8  
9  
10  
11  
12  
13  
14  
15  
16  
17  
18  
19  
20  
21  
22  
23  
24  
25  
26  
27  
28  
29  
30  
31  
32  
33  
34  
35  
36  
37  
38  
39  
40  
41  
42  
43  
44  
45  
46  
47  
48  
49  
50  
51  
52  
53  
54  
55  
56  
57  
58  
59  
60

**Table 3: Anthropometric, diet and physical activity measures in intervention and control groups at follow up**

| <b>Measure*</b>                     | <b>Intervention group (N=234)<br/>n (%) or mean (SD)</b> | <b>Control group (N=254)<br/>n (%) or mean (SD)</b> |
|-------------------------------------|----------------------------------------------------------|-----------------------------------------------------|
| <b>Anthropometric measures</b>      |                                                          |                                                     |
| BMI z-score (n=488)                 | 0.13 (1.5)                                               | 0.40 (1.5)                                          |
| <b>Weight status (n=488)</b>        |                                                          |                                                     |
| Underweight                         | 11 (4.7)                                                 | 8 (3.2)                                             |
| Healthy weight                      | 160 (68.4)                                               | 168 (66.1)                                          |
| Overweight                          | 27 (11.5)                                                | 21 (8.3)                                            |
| Obese                               | 36 (15.4)                                                | 57 (22.4)                                           |
| Waist circumference (cm)<br>(n=472) | 59.4 (9.5)                                               | 60.4 (9.1)                                          |
| <b>Skinfold measures (mm)</b>       |                                                          |                                                     |
| Biceps (n=486)                      | 6.9(3.5)                                                 | 7.7 (3.8)                                           |
| Triceps (n=485)                     | 11.2 (4.8)                                               | 11.9 (4.6)                                          |
| Subscapular (n=479)                 | 8.5 (5.3)                                                | 9.3 (5.8)                                           |
| Suprailiac (n=475)                  | 8.8 (5.9)                                                | 9.4 (5.9)                                           |
| Sum of 4 skinfolds (n=471)          | 35.2 (18.1)                                              | 37.6 (18.4)                                         |
| Thigh (n=404)                       | 17.3 (7.5)                                               | 18.9 (8.1)                                          |
| Sum of upper skinfolds (n=479)      | 26.5 (12.7)                                              | 28.7 (13.1)                                         |
| Sum of lower skinfolds (n=402)      | 25.3(11.8)                                               | 27.6 (13.1)                                         |
| Bioimpedance (Ω) (n=453)            | 692.0 (83.1)                                             | 688.3 (81.3)                                        |
| <b>Physical Activity (n=467)</b>    |                                                          |                                                     |
| Counts/min                          | 68.7 (33.4)                                              | 71.0 (22.9)                                         |
| MVPA min/24h                        | 49.1 (21.8)                                              | 51.1 (20.2)                                         |
| Achieving ≥60 mins MVPA             | 53 (23.6)                                                | 73 (30.2)                                           |
| <b>Dietary intake</b>               |                                                          |                                                     |
| <b>School (n=454)</b>               |                                                          |                                                     |
| Energy (KJ)                         | 1908.7 (831.8) <sup>S</sup>                              | 2045.1 (777.9)                                      |
| Fruit and vegetables (grams)        | 143.1 (135.0)                                            | 93.9 (94.0)                                         |
| Sugar (grams)                       | 25.0 (15.7)                                              | 29.8 (16.7)                                         |
| <b>Home (n=163)</b>                 |                                                          |                                                     |
| Energy (KJ)                         | 7860.5 (4366.4)                                          | 8145.4 (4004.5)                                     |
| Fruit & vegetables (grams)          | 367.5 (316.6)                                            | 342.0 (224.9)                                       |
| Sugar (grams)                       | 113.8 (63.7)                                             | 121.0 (56.8)                                        |
| <b>24h dietary intake (n=163)</b>   |                                                          |                                                     |
| Energy (KJ)                         | 9527.8 (4400.3)                                          | 9820.7 (3773.1)                                     |
| Fruit & vegetables (grams)          | 519.1 (350.2)                                            | 446.0 (238.5)                                       |
| Sugar (grams)                       | 137.2 (64.2)                                             | 150.5 (59.9)                                        |

\*n in this column indicates how many children had useable data for each measure

**Table 4: Adjusted differences in anthropometric, diet and physical activity measures between control and intervention groups**

| Outcome variable*                     | Intervention vs. Control (adjusted for baseline) | p value | Intervention vs. Control (finally adjusted)† | p value |
|---------------------------------------|--------------------------------------------------|---------|----------------------------------------------|---------|
|                                       | <b>OR (95% CI)</b>                               |         | <b>Adjusted†OR (95% CI)</b>                  |         |
| Obese (n=486)                         | 0.36 (0.17, 0.77)                                | 0.01    | 0.41 (0.19, 0.89)                            | 0.02    |
| Achieving ≥60 mins MVPA (n=441)       | 0.82 (0.52, 1.28)                                | 0.38    | 0.74 (0.45, 1.20)                            | 0.22    |
|                                       | <b>Mean difference (95%CI)</b>                   |         | <b>Adjusted† mean difference (95%CI)</b>     |         |
| BMI z-score (n=486)                   | -0.15 (-0.26, -0.03)                             | 0.02    | -0.15 (-0.27, -0.03)                         | 0.02    |
| Waist circumference (cm) (n=482)      | -0.88 (-1.87, 0.10)                              | 0.08    | -0.86 (-1.87, 0.15)                          | 0.09    |
| Skinfold measures (mm)                |                                                  |         |                                              |         |
| Biceps (n=479)                        | -0.48 (-0.98, 0.01)                              | 0.06    | -0.44 (-0.93, 0.06)                          | 0.08    |
| Triceps (n=478)                       | -0.14 (-0.68, 0.40)                              | 0.61    | -0.10 (-0.64, 0.45)                          | 0.71    |
| Subscapular (n=469)                   | -0.46 (-0.98, 0.06)                              | 0.09    | -0.38 (-0.89, 0.14)                          | 0.15    |
| Suprailiac (n=468)                    | -0.23 (-0.84, 0.37)                              | 0.45    | -0.23 (-0.83, 0.37)                          | 0.46    |
| Sum of 4 skinfolds (n=461)            | -1.09 (-2.85, 0.67)                              | 0.23    | -0.97 (-2.70, 0.77)                          | 0.27    |
| Thigh (n=324)                         | -0.31 (-1.39, 0.78)                              | 0.58    | -0.27 (-1.38, 0.84)                          | 0.63    |
| Sum of upper skinfolds (n=468)        | -0.90 (-2.21, 0.42)                              | 0.18    | -0.76 (-2.05, 0.53)                          | 0.25    |
| Sum of lower skinfolds (n=323)        | -0.36 (-1.91, 1.19)                              | 0.65    | -0.40 (-1.98, 1.18)                          | 0.62    |
| Bioimpedance (Ω) (n=409)              | 3.33 (-5.23, 11.89)                              | 0.45    | 3.50 (-5.14, 12.15)                          | 0.43    |
| Counts/min (increments of 20) (n=441) | -0.15 <sup>#</sup> (-0.34, 0.04)                 | 0.12    | -0.18 <sup>#</sup> (-0.36, 0.01)             | 0.06    |
| MVPA min/24h (n=441)                  | 1.52 (-2.14, 5.17)                               | 0.42    | 0.51 (-2.97, 3.99)                           | 0.77    |
| <b>School</b>                         |                                                  |         |                                              |         |
| Energy (KJ) (n=358)                   | -78.78 (-240.75, 83.18)                          | 0.34    | -86.02 (-250.29, 78.20)                      | 0.30    |
| Fruit and vegetables (grams) (n=358)  | 59.88 (34.56, 85.19)                             | <0.001  | 63.35 (37.53, 89.17)                         | <0.001  |
| Sugar (grams) (n=358)                 | -3.86 (-7.27, -0.45)                             | 0.03    | -3.86 (-7.37, -0.36)                         | 0.03    |
| <b>Home</b>                           |                                                  |         |                                              |         |
| Energy (KJ)(n=61)                     | 1322.94 (-292.75, 2938.60)                       | 0.12    | 1534.73 (-117.74, 3187.20)                   | 0.07    |
| Fruit & vegetables (grams) (n=61)     | 21.61 (-81.26, 124.47)                           | 0.68    | 18.98 (-89.43, 127.40)                       | 0.73    |
| Sugar (grams) (n=61)                  | 6.88 (-17.04, 30.81)                             | 0.57    | 9.17 (-15.16, 33.51)                         | 0.45    |
| <b>24h dietary intake</b>             |                                                  |         |                                              |         |
| Energy (KJ) (n=61)                    | 883.16 (-888.31, 2654.66)                        | 0.32    | 1092.36 (-723.33, 2908.09)                   | 0.23    |

1  
2  
3  
4  
5  
6  
7  
8  
9  
10  
11  
12  
13  
14  
15  
16  
17  
18  
19  
20  
21  
22  
23  
24  
25  
26  
27  
28  
29  
30  
31  
32  
33  
34  
35  
36  
37  
38  
39  
40  
41  
42  
43  
44  
45  
46  
47  
48  
49

| Outcome variable*                 | Intervention vs. Control (adjusted for baseline) | p value | Intervention vs. Control (finally adjusted)† | p value |
|-----------------------------------|--------------------------------------------------|---------|----------------------------------------------|---------|
| Fruit & vegetables (grams) (n=61) | 89.64 (-32.51, 211.79)                           | 0.15    | 86.70 (-42.92, 216.32)                       | 0.19    |
| Sugar (grams) (n=61)              | 3.16 (-22.74, 29.07)                             | 0.81    | 4.23 (-22.00, 30.47)                         | 0.75    |

\*n indicates the number of participants included in each finally adjusted model

†Adjusted for age, sex, ethnicity and baseline values

For peer review only



## Discussion

We demonstrated the feasibility of delivering a multicomponent obesity prevention intervention targeting dietary and physical activity behaviours to a socioeconomically disadvantaged, multiethnic population of primary school aged children. The **feasibility study** provided an opportunity to refine and modify the programme and yielded important information on acceptability and feasibility of both the intervention and measurements required for assessing outcomes in a definitive RCT.

### *Strengths and limitations*

This is one of few studies focusing on SA populations, which comprise the largest minority ethnic group in the UK, with higher risk of obesity and its consequences. The iterative process of intervention refinement was informed by the MRC framework for complex interventions. Whilst the framework has been used for development of other interventions in NHS settings, we have demonstrated its use in the wider community setting.

The components of the intervention were influenced by stakeholder views and available resources, thus its applicability for wider populations and settings is potentially limited. However, the multifaceted intervention aimed to modify school and family environments and included elements that have been identified as promising in systematic reviews.[7,23] Furthermore the intervention components have theoretical validity for behaviour change in any population, and the incorporated techniques are transferrable. The targeting of South Asian stakeholders for intervention development is likely to have allowed us to exclude intervention components that would not be acceptable to this sub-population. Nevertheless, the developed intervention is likely to be acceptable not only in these ethnic groups, but also in the wider UK population.

Delivery of intervention, undertaken by staff outside the research team, was non-standardised. This allowed a pragmatic approach to be tested, which could be more easily rolled out. **Intervention components delivered directly to the children and through school staff (physical activity component and Villa Vitality) were more likely to have high uptake than those delivered to families (leisure taster**

1  
2 sessions or walk leader training). The complexity of delivering community based interventions targeting  
3  
4 children probably explains why most previous trials are school based.  
5

6  
7 During the trial, all children in schools allocated to the intervention arm were exposed to the intervention  
8  
9 components. However, only about half had consent for measurements. We found no significant  
10  
11 differences in sex and ethnicity between consented and non-consented children. Further, the distribution  
12  
13 of weight status among children who were measured is similar to national data for this age group[24],  
14  
15 suggesting that selection bias was unlikely.  
16

### 17 18 19 *Intervention acceptability and feasibility*

20  
21 A variety of intervention techniques were incorporated with variable success. Environmental restructuring  
22  
23 (structured physical activity and play opportunities in school) was feasible and generally accepted.

24  
25 Demonstration of the target behaviour and prompting practice (Villa Vitality, cooking workshops, taster  
26  
27 activity sessions and walking groups) had mixed results. Apart from Villa Vitality which was  
28  
29 incorporated within the school setting, there was limited participation, despite enthusiasm amongst those  
30  
31 who did take part. At a population level, these types of intervention are less feasible to deliver, unless  
32  
33 they are incorporated within the school setting. Providing information and prompting identification of  
34  
35 role models were feasible and acceptable and would be replicable in a larger trial. Techniques to prompt  
36  
37 self monitoring and rewarding successful behaviour were acceptable, but had limited success in this  
38  
39 community setting.  
40  
41  
42

43  
44 During the period of intervention delivery, we used a variety of methods and involved different  
45  
46 stakeholders (school staff, parents and children), to assess the acceptability of the intervention  
47  
48 components. We also allowed the programme to be modified and the implementation of elements to vary  
49  
50 in the different intervention schools. This tailoring to the local school context was critical in determining  
51  
52 the success of the intervention. For example in one school, lunchtime supervisors were trained to deliver a  
53  
54 structured physical activity programme at lunchtime, but did not go on to deliver the programme.  
55  
56

57  
58 Following this failure of implementation, an enthusiastic teaching assistant was trained, who successfully  
59  
60

1  
2 delivered the intervention. Thus, whilst standardisation of aspects of the intervention is important, some  
3  
4 scope for tailoring to local context in terms of implementation and delivery needs to be considered.[25]  
5  
6  
7  
8  
9

### 10 *Informing a definitive RCT*

11  
12 The intervention was aimed at predominantly SA populations residing in inner city settings. Despite  
13  
14 challenges, including language barriers, 80% were successfully followed up. We demonstrated the  
15  
16 feasibility of undertaking a wide range of anthropometric measures within school and the feasibility of  
17  
18 Actiheart monitors for assessing physical activity in free living children (approximately 90% had usable  
19  
20 data). Assessment of dietary intake was less successful at baseline, mainly due to language barriers and  
21  
22 difficulties for parents in completing the forms, but the **feasibility study** allowed us to refine the  
23  
24 administration of the tool, so that measurement was more complete at follow up.  
25  
26  
27

28  
29 Although the **feasibility study** was not powered to examine intervention outcomes, we did find that the  
30  
31 direction of effect for most outcomes were in favour of the intervention, supporting the need for a  
32  
33 definitive trial. In particular, at follow up children in intervention schools had BMI z-scores on average  
34  
35 0.15kg/m<sup>2</sup> lower than children in control schools, which is in keeping with the effect size reported in a  
36  
37 meta-analysis of childhood obesity prevention trials.[7]  
38  
39

40  
41 **The costs of the intervention were not formally examined, as this was a feasibility study and the**  
42  
43 **intervention components were being modified and tested. Nevertheless the feasibility stage provided an**  
44  
45 **opportunity to consider resource requirements and to modify the intervention accordingly to inform a**  
46  
47 **definitive study. In order to ensure sustainability, most intervention components were adapted from**  
48  
49 **existing services commissioned by the local NHS bodies at the time (including Villa Vitality, cooking**  
50  
51 **courses and training of walk leaders). The resources for training teachers to deliver structured physical**  
52  
53 **activity sessions are available commercially to schools, and were compiled by the research team. The**  
54  
55 **signposting information for local leisure facilities and for the weekend activities was similarly compiled**  
56  
57 **by the research team, summarising already available services and facilities.**  
58  
59  
60

## Conclusions

We have used the MRC framework for complex interventions to develop a childhood obesity prevention intervention that can be evaluated within the context of a cluster-RCT. Although the intervention was informed by stakeholders, and evidence and guidelines from previous literature, some elements were found not to be feasible or acceptable to participants in practice. The **feasibility study** was an essential step in finalising the intervention programme prior to definitive evaluation. Based on the findings from this study, a definitive cluster-RCT is currently underway to assess the clinical and cost-effectiveness of the finalised intervention in primary school children (ISRCTN97000586).

## Acknowledgements

S Passmore (Birmingham City Council) advised the study team on identification and engaging of schools and pupils, and the tailoring of interventions to be acceptable to schools.

M Howard (Heart of Birmingham PCT) facilitated the delivery of some of the intervention components through the Primary Care Trust.

E McGee (Birmingham Community Nutrition and Dietetic Service) oversaw the delivery of the cooking workshops and contributed to their evaluation.

K Westgate and S Mayle (MRC Epidemiology Unit, Cambridge) undertook cleaning, reducing and analysing the physical activity data.

C Cleghorn (University of Leeds) contributed to the development of the CADET, oversaw staff training and administration of the tool, and undertook cleaning and analysis of the dietary data.

The sponsor of the study (University of Birmingham) had no role in the study design, data collection, data analysis, data interpretation, writing of the report, or in the decision to submit the paper.

## Contributors Statement

Peymané Adab: Dr. Adab conceptualized and designed the study overall, oversaw study planning, delivery and evaluation, wrote the analysis plan and drafted and revised the paper and approved the final manuscript as submitted. She is a guarantor.

Miranda Pallan: Dr. Pallan assisted in the overall delivery of the study, designed the process evaluation, undertook the data cleaning and analysis. She has approved the final manuscript as submitted, and is also a guarantor.

Janet Cade: Professor Cade designed the dietary data assessment tool, oversaw training for researchers collecting data and the analysis of the dietary data obtained. She has approved the final manuscript as submitted.

Ulf Ekelund: Dr. Ekelund advised on physical activity assessment, provided training of researchers in collecting Actiheart data and oversaw the analysis of physical activity data from Actihearts. He has approved the final manuscript as submitted.

Timothy Barrett: Professor Barrett advised on anthropometric measurement tools used, arranged for training of research staff to undertaken measures and advised on interpretation of the anthropometric data obtained. He has approved the final manuscript as submitted.

Amanda Daley: Dr. Daley advised on physical activity components of the intervention and use of incentives to motivate children. She has approved the final manuscript as submitted.

Jonathan Deeks: Professor Deeks provided statistical support, advised on statistical analysis and on using the data obtained to inform sample size estimation for the definitive trial. He has approved the final manuscript as submitted.

Joan Duda: Professor Duda advised on the psychological measurement instruments, advised research staff on child protection issues and contributed to shaping the physical activity components of the intervention. She has approved the final manuscript as submitted.

Paramjit Gill: Dr. Gill advised on anthropometric measurements to be included, the sampling strategy and on ethnic minority health. He has approved the final manuscript as submitted.

Jayne Parry: Professor Parry advised on process evaluation and contributed to the interpretation of qualitative data obtained. She has approved the final manuscript as submitted.

1  
2  
3 Raj Bhopal: Professor Bhopal advised on the anthropometric measurements, definition of the target  
4 population, tailoring of the intervention to be culturally appropriate and relevant literature on ethnicity  
5 and health. He also provided important comments on the final draft and has approved the final manuscript  
6 as submitted.  
7

8  
9 Kar Keung Cheng: Professor Cheng conceived the original idea informing this study, contributed to the  
10 planning and delivery. He has approved the final manuscript as submitted.  
11

12 All authors have contributed to the design of the intervention, advised on study progress and critically  
13 revised and approved the final manuscript.  
14

### 15 **Conflict of Interest Statement**

16  
17 All authors declare there was no support from any organisation for the submitted work; no financial  
18 relationships with any organisations that might have an interest in the submitted work in the previous  
19 three years; no other relationships or activities that could appear to have influenced the submitted work.  
20 Amanda Daley is supported by an NIHR Senior Research Fellowship award. The other authors have no  
21 disclosures relevant to this article. The views expressed in this publication are those of the authors and not  
22 necessarily those of the NHS, The National Institute for Health Research or the Department of Health.  
23 Primary Care Clinical Sciences is a member of the NIHR National School for Primary Care Research.  
24 The funding organisation did not play any role in design and conduct of the study; collection,  
25 management, analysis, and interpretation of the data; and preparation, review, or approval of the  
26 manuscript.  
27  
28  
29

### 30 **Data Sharing Statement**

31  
32 The BEACHeS study dataset is available on request from the study investigators.  
33

### 34 **Funding source**

35  
36 The Birmingham healthy Eating, Active lifestyle for Children Study (BEACHeS) was funded by the  
37 National Prevention Research Initiative (NPRI, <http://www.npri.org.uk>), Grant no. G0501292 and we are  
38 grateful to all the funding partners for their support: British Heart Foundation; Cancer Research UK;  
39 Department of Health; Diabetes UK; Economic and Social Research Council; Medical Research Council;  
40 Research and Development Office for the Northern Ireland Health and Social Services; Chief Scientist  
41 Office, Scottish Executive Health Department; Welsh Assembly Government and World Cancer Research  
42 Fund.  
43  
44

45 **Clinical Trial Registration:** ISRCTN51016370. The date of trial registration was delayed because this  
46 was a feasibility study. At the time of starting the study (2006), guidance on whether registration is  
47 required was ambiguous.  
48  
49  
50

### 51 **Licence for Publication Statement**

52  
53 “I Miranda Pallan, the Corresponding Author of this article contained within the original manuscript  
54 which includes any diagrams & photographs, other illustrative material, video, film or any other material  
55 howsoever submitted by the Contributor(s) at any time and related to the Contribution (“the  
56 Contribution”), have the right to grant on behalf of all authors and do grant on behalf of all authors, a  
57 licence to the BMJ Publishing Group Ltd and its licensees, to permit this Contribution (if accepted) to be  
58 published in BMJ Open and any other BMJ Group products and to exploit all subsidiary rights, as set out  
59 in the licence at: ([http://group.bmj.com/products/journals/instructions-for-authors/BMJOpen\\_licence.pdf](http://group.bmj.com/products/journals/instructions-for-authors/BMJOpen_licence.pdf))  
60

## References

- 1  
2  
3  
4  
5  
6 (1) Lobstein T, Baur L, Uauy R. Obesity in children and young people: a crisis in public health. *Obes Rev* 2004; **5**(Suppl. 1):4-85.
- 7  
8  
9  
10 (2) Baker JL, Olsen LW, Sorensen TIA. Childhood Body-Mass Index and the risk of coronary heart  
11 disease in adulthood. *N Engl J Med* 2007; **357**:2329-37.
- 12  
13 (3) Stamatakis E, Wardle J, Cole TJ. Childhood obesity and overweight prevalence trends in England:  
14 evidence for growing socioeconomic disparities. *Int J Obes* 2010; **34**:41-7.
- 15  
16 (4) NHS Information Centre for Health and Social Care. National Child Measurement Programme:  
17 England, 2011/12 school year. The Health and Social Care Information Centre, 2012.
- 18  
19 (5) Dinsdale H, Ridler C, Rutter H. National Child Measurement Programme: Changes in children's  
20 body mass index between 2006/7 and 2010/11. Oxford, National Obesity Observatory, 2012.
- 21  
22 (6) Summerbell CD, Waters E, Edmunds LD, et al. Interventions for preventing obesity in children.  
23 *Cochrane Database of Systematic Reviews* 2005, Issue 3, John Wiley & Sons, Ltd Chichester,  
24 UK, DOI: 10 1002/14651858 CD001871 pub2.
- 25  
26 (7) Waters E, de Silva-Sanigorski A, Hall B J, et al. Interventions for preventing obesity in children.  
27 *Cochrane Database of Systematic Reviews* 2011, Issue 12, John Wiley & Sons, Ltd Chichester,  
28 UK, DOI:10 1002/14651858 CD001871 pub3.
- 29  
30 (8) McPherson K, Marsh T, Brown M. Tackling obesities: future choices - modelling future trends in  
31 obesity and the impact on health. Report No. 2. London, Government Office for Science, 2007.
- 32  
33 (9) Wang Y, Wu Y, Wilson RF, et al. Childhood obesity prevention programs: comparative  
34 effectiveness review and meta-analysis. *Comparative Effectiveness Review* No. 115. Rockville,  
35 MD, Agency for Healthcare Research and Quality, 2013.
- 36  
37 (10) National Institute for Health and Clinical Excellence. Obesity: the prevention, identification,  
38 assessment and management of overweight and obesity in adults and children. London, 2006.
- 39  
40 (11) Campbell M, Fitzpatrick R, Haines A, et al. Framework for design and evaluation of complex  
41 interventions to improve health. *BMJ* 2000; **321**:694-6.
- 42  
43 (12) Pallan M, Parry J, Cheng KK, Adab P. Development of a childhood obesity prevention  
44 programme with a focus on UK South Asian Communities. *Prev Med* 2013; **57**:948-54.
- 45  
46 (13) Varni JW, Limbers CA, Burwinkle TM. How can young children reliably and validly self-report  
47 their health-related quality of life?: an analysis of 8,591 children across age subgroups with the  
48 PedsQL 4.0 generic core scales. *Health Qual Life Outcomes* 2007; **5**:1.
- 49  
50 (14) Marsh HW, Barnes J, Cairns L, Tidman M. Self-Description Questionnaire: Age and sex effects in  
51 the structure and level of self-concept for preadolescent children . *J Educ Psychol* 1984; **76**:940-  
52 56.
- 53  
54 (15) Harter S, Pike R. The pictorial scale of perceived competence and social acceptance for young  
55 children. *Child Dev* 1984; **55**:1969-82.
- 56  
57  
58  
59  
60

- 1  
2  
3  
4  
5  
6  
7  
8  
9  
10  
11  
12  
13  
14  
15  
16  
17  
18  
19  
20  
21  
22  
23  
24  
25  
26  
27  
28  
29  
30  
31  
32  
33  
34  
35  
36  
37  
38  
39  
40  
41  
42  
43  
44  
45  
46  
47  
48  
49  
50  
51  
52  
53  
54  
55  
56  
57  
58  
59  
60
- (16) Collins ME. Body figure perceptions and preferences among preadolescent children. *Int J Eat Disord* 1991; **10**:199-208.
- (17) Cade JE, Frewer L, Greenwood DC. Assessment of diet in young children with an emphasis on fruit and vegetable intake: using CADET – Child and Diet Evaluation Tool. *Public Health Nutr* 2006; **9**:501-8.
- (18) Brage S, Brage N, Franks P, et al. Reliability and validity of the combined heart rate and movement sensor Actiheart. *Eur J Clin Nutr* 2005; **59**:561-70.
- (19) Pallan M., Parry J., Adab P. Contextual influences on the development of obesity in children: a case study of UK South Asian communities. *Prev Med* 2012; **54**:205-11.
- (20) Michie S, Ashford S, Sniehotta FF, et al. A refined taxonomy of behaviour change techniques to help people change their physical activity and healthy eating behaviours: the CALO-RE taxonomy. *Psychol Health* 2011; **26**:1479-98.
- (21) Cole TJ, Freeman JV, Preece MA. Body mass index reference curves for the UK, 1990. *Arch Dis Child* 1995; **73**:25-9.
- (22) Corder K, Brage S, Wareham NJ, et al. Comparison of PAEE from combined and separate HR and movement models in children. *Med Sci Sports Exerc* 2005; **37**:1761-7.
- (23) Lavelle HV, Mackay DF, Pell JP. Systematic review and meta-analysis of school-based interventions to reduce body mass index. *J Public Health* 2012; **34**:360-9.
- (24) National Obesity Observatory. National Child Measurement Programme: detailed analysis of the 2007/08 national dataset. London, 2009.
- (25) Hawe P, Shiell A, Riley T. Complex interventions: how "out of control" can a randomised controlled trial be? *BMJ* 2004; **328**:1561-3.



1  
2  
3  
4  
5  
6  
7  
8  
9  
10  
11  
12  
13  
14  
15  
16  
17  
18  
19  
20  
21  
22  
23  
24  
25  
26  
27  
28  
29  
30  
31  
32  
33  
34  
35  
36  
37  
38  
39  
40  
41  
42  
43  
44  
45  
46  
47  
48  
49  
50  
51  
52  
53  
54  
55  
56  
57  
58  
59  
60

Figure 1: Flow diagram of recruitment and follow up of participants in the **feasibility study**

For peer review only

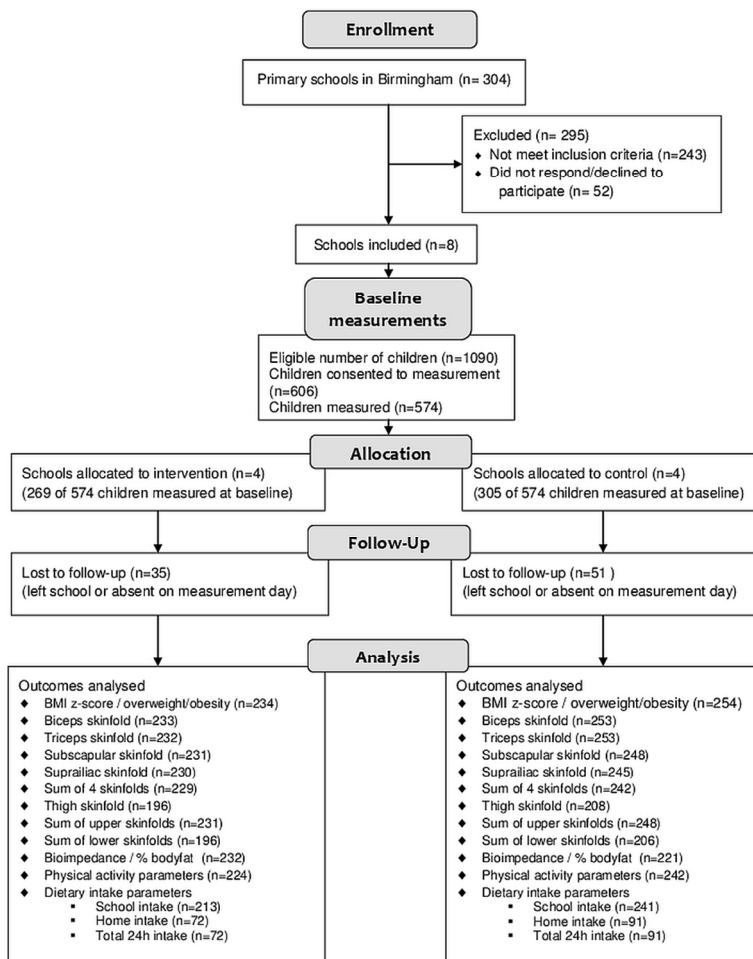

90x127mm (300 x 300 DPI)

## Preventing childhood obesity, exploratory trial focusing on South Asians: BEACHEs

### Appendix: Detailed findings from the process evaluation of intervention components included in the BEACHEs programme

| Intervention component                                                  | Evaluation findings                                                                                                                                                                                                                                                                                                                                                                                                                                                                                                                                                                                                                                                                                                                                                                                                                                                                                                                                                                                                                                                                                                                                                                                                                                                                                                                                                                                                                                                                                                                                                                                                                                                                                                                                                                                                                                                                                                                                                                                                                                                                                                                                                                                                                                                                                                                                                                                                                                   |
|-------------------------------------------------------------------------|-------------------------------------------------------------------------------------------------------------------------------------------------------------------------------------------------------------------------------------------------------------------------------------------------------------------------------------------------------------------------------------------------------------------------------------------------------------------------------------------------------------------------------------------------------------------------------------------------------------------------------------------------------------------------------------------------------------------------------------------------------------------------------------------------------------------------------------------------------------------------------------------------------------------------------------------------------------------------------------------------------------------------------------------------------------------------------------------------------------------------------------------------------------------------------------------------------------------------------------------------------------------------------------------------------------------------------------------------------------------------------------------------------------------------------------------------------------------------------------------------------------------------------------------------------------------------------------------------------------------------------------------------------------------------------------------------------------------------------------------------------------------------------------------------------------------------------------------------------------------------------------------------------------------------------------------------------------------------------------------------------------------------------------------------------------------------------------------------------------------------------------------------------------------------------------------------------------------------------------------------------------------------------------------------------------------------------------------------------------------------------------------------------------------------------------------------------|
| <b>School based activities</b><br>Physical activities within school day | <p><b>“Wake Up Shake Up”:</b> 3 intervention schools implemented this to varying degrees (twice a day in one school, once or less in others). Participation by children was greater if session was compulsory rather than optional. Questionnaire responses from the children suggested that it was generally well received, although a few children were reluctant to join in. Staff were generally enthusiastic about running this, but identified lack of time and lack of space as potential barriers to success.</p> <p><i>“[Wake Up Shake Up is] really popular, going really well, parents are now starting to join in a lot more because the idea was that the parents would join in as well. So I am really pleased with how that’s coming on”</i> (teacher and school physical education lead)</p> <p><b>Organised playground activities:</b> All 4 schools received training and attempted to introduce this at lunch times. Implementation varied greatly between schools, with some schools not consistently being able to deliver. A key factor for successful implementation was having an enthusiastic member of staff to inspire the play leaders. The school that had the least success with implementation was where the lunchtime supervisors were trained as play leaders but did not have a member of staff to lead them. Provision of playground equipment and using a zoning system in the playground supported successful delivery. Children and staff indicated that they enjoyed the scheme and supported it.</p> <p><i>“What I have found with [a teaching assistant] going out, who’s doing like the parachute games and that with them is much better, because the dinner ladies just didn’t take it on board. I think they came to the training because they had to but it’s had no impact, I’ve got to be honest”</i> (deputy head teacher)</p> <p><b>Take 10 curricular materials:</b> 2 of the schools implemented this component. Success depended on the enthusiasm and motivation of the class teachers. Teachers who used Take 10 were keen to continue and expand its use. Some members of staff identified lack of training and familiarity with the material as barriers to its implementation.</p> <p><i>“I know it [Take 10] works really well, I know it’s really accessible....the only problems I have is with the staff doing it or not doing it”</i> (teacher and school physical education lead)</p> |
| Incentive scheme to encourage physical activity out of school           | <p>The major obstacle to the success of this component was retention of leisure venues and maintenance of enthusiasm. Most venues that were initially recruited no longer actively participated after 2-3 months. Staff turnover, change in management, high frequency of temporary staff, low perceived importance and lack of interest from leisure centre staff contributed to the failure of this component. School staff felt that incentive schemes were generally a good way of motivating children. However, in addition to problems with venue participation, other problems were identified. Teachers felt that motivation needed regular reinforcement (e.g. by class teachers), children</p>                                                                                                                                                                                                                                                                                                                                                                                                                                                                                                                                                                                                                                                                                                                                                                                                                                                                                                                                                                                                                                                                                                                                                                                                                                                                                                                                                                                                                                                                                                                                                                                                                                                                                                                                              |

|                                                                      |                                                                                        |                                                                                                                                                                                                                                                                                                                                                                                                                                                                                                                                                                                                                                                                                                                                                                                                                                                                                                                                                                                                                                                                                                                                                                                                                                                                                                                                                                                                                                                                                |
|----------------------------------------------------------------------|----------------------------------------------------------------------------------------|--------------------------------------------------------------------------------------------------------------------------------------------------------------------------------------------------------------------------------------------------------------------------------------------------------------------------------------------------------------------------------------------------------------------------------------------------------------------------------------------------------------------------------------------------------------------------------------------------------------------------------------------------------------------------------------------------------------------------------------------------------------------------------------------------------------------------------------------------------------------------------------------------------------------------------------------------------------------------------------------------------------------------------------------------------------------------------------------------------------------------------------------------------------------------------------------------------------------------------------------------------------------------------------------------------------------------------------------------------------------------------------------------------------------------------------------------------------------------------|
|                                                                      |                                                                                        | <p>needed a specific goal to work towards, and a shorter time frame (e.g. one term rather than one school year) and tangible reward (named item, rather than an unspecified prize) would have helped to focus the children.</p> <p>Children were generally enthusiastic about collecting stickers. However difficulties experienced with receiving stickers from the majority of venues de-motivated them.</p> <p>Parents had found information on local sporting and leisure venues useful. The majority of parents were also in favour of incentive schemes to encourage children to undertake physical activities.</p> <p><i>“they [the children] were so eager to collect the stickers... especially at the beginning when we were having trouble with the stickers, when they [the leisure venues] weren’t giving them”</i> (deputy head teacher)</p>                                                                                                                                                                                                                                                                                                                                                                                                                                                                                                                                                                                                                     |
|                                                                      | Attendance at a course run by a Premier league football club                           | <p>This component was extremely popular both with children and school staff, with high (near 100%) attendance</p> <p>Most parents did not recall that their children attended the ‘Villa Vitality’ day</p> <p>Children attending Villa Vitality reported significantly greater levels of physical activity outside of school time 6-weeks post attendance, compared to control children.</p> <p><i>“they really enjoyed that [Villa Vitality], I think that was... you know, once they got into it and realised what it was about and that they got a lot out of it, then they really enjoyed it”</i> (deputy head teacher)</p>                                                                                                                                                                                                                                                                                                                                                                                                                                                                                                                                                                                                                                                                                                                                                                                                                                                |
| <b>Increasing skills of families through activity-based learning</b> | Cooking courses for family members                                                     | <p>Uptake was generally lower than capacity (4-10 participants / course). Uptake was highest in one school with an enthusiastic parent link worker.</p> <p>There was some drop out over the 5 weeks of the course but over 90% of participants attended 3 or more sessions.</p> <p>The courses were well received by those who attended. Compared to parents who did not participate, participants had lower baseline confidence in their cooking ability. Following the course, participants had higher levels of reported confidence than at baseline in shopping for healthy food and cooking healthy meals. They also reported that the family was eating more healthily.</p> <p>Courses where the children were also invited to cook with their parents were generally better attended. The model of parents learning about healthy cooking with their children was popular with parents, children and school staff.</p> <p>School staff thought it was feasible to use school time for healthy cooking sessions for children where parents could be invited along.</p> <p>Supporting information such as healthy eating tips and recipes in newsletters was well received by parents.</p> <p><i>“[cooking courses were] very, very successful, wonderful way of doing it. So the parents were learning about healthy ways of cooking and so on without it looking as if they were having a finger wagged at them”</i> (teacher and school-community liaison manager)</p> |
|                                                                      | Information on local leisure opportunities and week-end “taster” sessions for families | <p>Uptake of the taster activity sessions was generally poor, although it did increase through the year through recommendations by those who attended.</p> <p>Activities were very well received by those who did attend.</p> <p>School staff were supportive by the taster activity sessions and expressed surprise and disappointment by the low uptake rates.</p> <p>The taster sessions were extremely resource intensive to run, in terms of cost and staff time.</p> <p>Most parents (&gt;90%) found the information signposting healthy activities and venues useful, and school staff also felt this had been useful for</p>                                                                                                                                                                                                                                                                                                                                                                                                                                                                                                                                                                                                                                                                                                                                                                                                                                           |

---

parents and served to motivate them to try out local facilities.

*"I was so disappointed that out of 120 children, so few families took up these free visits when they were actually picked up and taken somewhere"*  
(deputy head teacher)

---

Training walk  
leaders to initiate  
community walking  
programmes

This component proved unfeasible, as there was a lack of volunteers to train as walk leaders. Even those who expressed an initial interest failed to attend the training. Despite repeated efforts to recruit community volunteers, only one person attended a training session, but they failed to organise any walking trips.

*"we put signs up and sent leaflets out to see if anybody was interested in being a walk leader or training and I don't think we got anybody back at all"* (deputy head teacher)

---
